# Supplementary material for: Identification of a Novel Small RNA srvg23535 in Vibrio alginolyticus ZJ-T and Its Characterization With Phenotype MicroArray Technology
Source: Front Microbiol. 2018 Oct 5;9:2394. doi: 10.3389/fmicb.2018.02394 (PMC6186989; doi:10.3389/fmicb.2018.02394)
Supplement: TABLE S1 — Nucleotide sequences of primers or probes used in this study. [file Table_1.XLSX]

## Sheet: Sheet1
Supplementary Table 1 Nucleotide sequences of primers or probes used in this study
Name	Sequence (5'-3')	Goal
NB-srvg23535	TCCTGAGGAGAAACTCGCGAAGTCTA	Northern blot
NB-5.0S RNA	CCCCACACTACCATCGGCGCTATT
RACE-UPML	TAATACGACTCACTATAGGGCAAGCAGTGGTATCAACGCAGAGT	Race
RACE-UPMS	CTAATACGACTCACTATAGGGC
race-srvg23535-F	GATTACGCCAAGCTTACATTCATTCTGAATAGACTTCGC
race-srvg23535 -R	GATTACGCCAAGCTTAGTTTCCTGAGGAGAAACTCGC
psW7848-F	GTCTGATTCGTTACCAATTATGACAAC	Mutatenesis
psW7848-R	GAATTCGATATCAAGCTTATCGATAC
srvg23535-UP-F	aagcttgatatcgaattcGAGGCACCTGTGGAGGGA
srvg23535-UP-R	gaattttaggTAAGAGTTAAGTCTGTTTTTTATCATCGAAAG
srvg23535-DOWN-F	ttaactcttaCCTAAAATTCCGCTAATTAAG
srvg23535-DOWN-R	ttggtaacgaatcagacCCATCACCTAACACGTCC
Del-check-pSW7848-F	TCACTGTCCCTTATTCGCACC
Del-check-pSW7848-R	CTGCTTTTGAGCACTACCCG
△srvg23535-check-F	GGCACTCCTATGCCTCAATCAAAG
△srvg23535-check-R	CATGTTGCGTTGATGCGTTCATTAC
RT-BAU10_23535-UP-F	GGAGGGAAGCGATGGTGAAA	qPCR
RT-BAU10_23535-UP-R	GACGACGAACCATGCGACTA
RT-BAU10_23540-DOWN-F	CGGTGAGATGCTGAAGTCGT
RT-BAU10_23540-DOWN-R	TGGTACGAACAGCGGAAACA
RT-srvg23535-F	ACCTTTTGTCCTTTCTGATGATTAA
RT-srvg23535-R	AAAGCGAGTTTCCTGAGGAG
gyrA-F	TCGAAGAAGGTGAGCGCATT
gyrA-R	TCACAGCGATTAGGCCGTTT
uvrA-F	GAAGGAAATCAACGACCGCC
uvrA-R	GGCCAATCGACGGTTCATCT
recA-F	TCTTCATCAACCAAATCCGTA
recA-R	GCTGCAATCTTATTCTTAACAACTT
