# Supplementary material for: Identification of a Novel Small RNA srvg23535 in Vibrio alginolyticus ZJ-T and Its Characterization With Phenotype MicroArray Technology
Source: Front Microbiol. 2018 Oct 5;9:2394. doi: 10.3389/fmicb.2018.02394 (PMC6186989; doi:10.3389/fmicb.2018.02394)
Supplement: TABLE S3 — Details of common targets predicted by IntaRNA and target RNA2. [file Table_3.XLSX]

## Sheet: targetRNA2-150-150-ZJ-T ok (2)
****************************************																****************************************
PROGRAM PARAMETERS																PROGRAM PARAMETERS
TargetRNA version: 2.01																TargetRNA version: 2.01
Replicon: Vibrio alginolyticus NBRC 15630 = ATCC 17749 chromosome 1																Replicon: Vibrio alginolyticus NBRC 15630 = ATCC 17749 chromosome 2
NTs before start codon: 150																NTs before start codon: 150
NTs after start codon: 150																NTs after start codon: 150
Seed length: 7																Seed length: 7
sRNA conservation and accessibility: true																sRNA conservation and accessibility: true
sRNA window size: 13																sRNA window size: 13
mRNA structural accessibility: true																mRNA structural accessibility: true
Interaction region: 20																Interaction region: 20
Filter size: 400																Filter size: 400
Single target: -																Single target: -
File of candidate targets: -																File of candidate targets: -
p-value: 0.05																p-value: 0.05
****************************************																****************************************
Rank Gene Synonym Energy Pvalue sRNA_start sRNA_stop mRNA_start mRNA_stop																Rank Gene Synonym Energy Pvalue sRNA_start sRNA_stop mRNA_start mRNA_stop
1 - N646_1196 -16.46 0.000 38 53 -6 10																1 - N646_3861 -14.77 0.001 27 44 129 146
2 - N646_2839 -13.95 0.002 34 48 126 140																2 - N646_4042 -12.63 0.005 36 46 -134 -124
3 - N646_1652 -13.69 0.002 12 26 -15 -1																3 - N646_3168 -11.75 0.009 37 53 -103 -88
4 - N646_1320 -13.58 0.002 69 84 -35 -20																4 - N646_4478 -11.41 0.011 25 43 -128 -110
5 - N646_2230 -11.75 0.009 36 52 -5 12																5 - N646_4551 -11.3 0.012 27 44 24 41
6 - N646_1334 -11.44 0.011 57 74 -13 5																6 - N646_4686 -11.27 0.012 12 30 -20 -1
7 - N646_0016 -11.25 0.012 25 44 9 27																7 - N646_3113 -11.14 0.013 26 44 75 92
8 - N646_1776 -11.1 0.013 70 85 -96 -81																8 - N646_3505 -11.04 0.013 33 44 2 13
9 - N646_2091 -10.67 0.017 62 78 18 34																9 - N646_3154 -10.53 0.018 16 30 -59 -45
10 - N646_2234 -10.65 0.017 41 56 136 149																10 - N646_4083 -10.28 0.020 37 51 -53 -38
11 - N646_3023 -10.62 0.017 40 54 58 72																11 - N646_4470 -9.96 0.024 38 48 -125 -115
12 - N646_0855 -10.56 0.018 33 46 -131 -118																12 - N646_4055 -9.8 0.026 11 29 -22 -3
13 - N646_2605 -10.5 0.018 54 74 127 147																13 - N646_3447 -9.64 0.028 11 22 -140 -129
14 - N646_2382 -10.06 0.023 60 75 49 63																14 - N646_4021 -9.57 0.029 36 46 12 22
15 - N646_0440 -9.89 0.025 40 54 -120 -106																15 - N646_3159 -9.35 0.032 39 54 -80 -65
16 - N646_1350 -9.58 0.029 36 52 18 34																16 - N646_4433 -9.28 0.033 41 56 -9 7
17 - N646_2243 -9.58 0.029 36 46 -136 -126																17 - N646_3604 -9.21 0.034 22 35 -138 -125
18 - N646_1371 -9.53 0.029 69 78 139 148																18 - N646_3571 -9.2 0.034 38 48 -1 10
19 - N646_2264 -9.31 0.032 39 55 -8 9																19 - N646_4001 -9.11 0.035 15 30 128 144
20 - N646_3052 -9.26 0.033 56 69 -8 6																20 - N646_4544 -9.07 0.036 14 27 -92 -79
21 - N646_1323 -9.15 0.035 19 33 -76 -61																21 - N646_4248 -9.07 0.036 36 51 36 51
22 - N646_0145 -9.14 0.035 27 42 -28 -13																22 - N646_3634 -9.03 0.037 14 29 -48 -34
23 - N646_0589 -9.12 0.035 88 103 -46 -30																23 - N646_4230 -8.79 0.041 48 67 -6 13
24 - N646_0194 -9.11 0.036 1 15 -45 -30																24 - N646_4179 -8.66 0.043 59 71 17 29
25 - N646_0503 -9.1 0.036 34 54 -56 -36																25 - N646_3167 -8.61 0.044 67 78 -42 -31
26 - N646_1565 -9.06 0.036 54 73 -16 3																26 - N646_3232 -8.43 0.047 61 76 11 26
27 - N646_0526 -8.96 0.038 36 51 103 118																27 - N646_4240 -8.35 0.049 90 102 96 108
28 - N646_0804 -8.73 0.042 7 21 69 83																28 - N646_4503 -8.34 0.049 54 65 133 144
29 - N646_2788 -8.71 0.042 39 54 -150 -136
30 - N646_0557 -8.63 0.044 15 31 -24 -7																%%%%%%%%%%%%%%%%%%%%%%%%%%%%%%%%%%%%%%%%%%%%%%%%%%%%%%%%%%%%%%%%%%%%%%%%%%%%%%%%
31 - N646_1299 -8.61 0.044 12 27 133 149																N646_3861 1
32 - N646_2882 -8.61 0.044 33 45 -61 -49																misc_RNA_3465 44 3' UCGGUUAGAUAAUUAGUA 5' 27
33 - N646_1035 -8.59 0.044 35 48 -1 13																|:||||||||| :|:|
34 - N646_0734 -8.56 0.045 13 27 -16 -2																N646_3861 129 5' CGUCAAUCUAUUCGUUAA 3' 146
35 - N646_1379 -8.51 0.046 12 26 -23 -9
36 - N646_2055 -8.38 0.048 1 12 68 80																Energy: -14.77
37 - N646_2415 -8.33 0.049 41 54 -7 7																p-value: 0.001
38 - N646_0768 -8.3 0.050 19 31 120 132																543973992 gene product: hypothetical protein
%%%%%%%%%%%%%%%%%%%%%%%%%%%%%%%%%%%%%%%%%%%%%%%%%%%%%%%%%%%%%%%%%%%%%%%%%%%%%%%%																%%%%%%%%%%%%%%%%%%%%%%%%%%%%%%%%%%%%%%%%%%%%%%%%%%%%%%%%%%%%%%%%%%%%%%%%%%%%%%%%
N646_1196 1																N646_4042 2
misc_RNA_3465 53 3' UUGUUAUACUCGGUUA 5' 38																misc_RNA_3465 46 3' ACUCGGUUAGA 5' 36
|||:||||||||||																|||||||||
N646_1196 -6 5' UACAGUAUGAGCCAAA 3' 10																N646_4042 -134 5' CGAGCCAAUCA 3' -124
Energy: -16.46																Energy: -12.63
p-value: 0.000																p-value: 0.005
543943110 gene product: hypothetical protein																543974173 gene product: putative acetyltransferase
%%%%%%%%%%%%%%%%%%%%%%%%%%%%%%%%%%%%%%%%%%%%%%%%%%%%%%%%%%%%%%%%%%%%%%%%%%%%%%%%																%%%%%%%%%%%%%%%%%%%%%%%%%%%%%%%%%%%%%%%%%%%%%%%%%%%%%%%%%%%%%%%%%%%%%%%%%%%%%%%%
N646_2839 2																N646_3168 3
misc_RNA_3465 48 3' AUACUCGGUUAGAUA 5' 34																misc_RNA_3465 53 3' UUGUUAUACUCGGUUAG 5' 37
:||||||||||||																|| |||||||||:||
N646_2839 126 5' AGUGAGCCAAUCUAG 3' 140																N646_3168 -103 5' UAC-AUAUGAGCCGAUA 3' -88
Energy: -13.95																Energy: -11.75
p-value: 0.002																p-value: 0.009
543944730 gene product: 1-deoxyxylulose-5-phosphate synthase																543973300 gene product: methyl-accepting chemotaxis protein
%%%%%%%%%%%%%%%%%%%%%%%%%%%%%%%%%%%%%%%%%%%%%%%%%%%%%%%%%%%%%%%%%%%%%%%%%%%%%%%%																%%%%%%%%%%%%%%%%%%%%%%%%%%%%%%%%%%%%%%%%%%%%%%%%%%%%%%%%%%%%%%%%%%%%%%%%%%%%%%%%
N646_1652 3																N646_4478 4
misc_RNA_3465 26 3' GUCUUUCCUGUUUUC 5' 12																misc_RNA_3465 43 3' CGGUUAGAUAAUUAGUAGU- 5' 25
||||||||:|:||																|| |||||| |||:|||
N646_1652 -15 5' AAGAAAGGAUAGAAA 3' -1																N646_4478 -128 5' UCCUUUCUAUU-AUCGUCAU 3' -110
Energy: -13.69																Energy: -11.41
p-value: 0.002																p-value: 0.011
543943566 gene product: 2-C-methyl-D-erythritol 2,4-cyclodiphosphate synthase																543974609 gene product: putative electron transfer flavoprotein, alpha subunit
%%%%%%%%%%%%%%%%%%%%%%%%%%%%%%%%%%%%%%%%%%%%%%%%%%%%%%%%%%%%%%%%%%%%%%%%%%%%%%%%																%%%%%%%%%%%%%%%%%%%%%%%%%%%%%%%%%%%%%%%%%%%%%%%%%%%%%%%%%%%%%%%%%%%%%%%%%%%%%%%%
N646_1320 4																N646_4551 5
misc_RNA_3465 84 3' CUUUGAGCGCUUCAGA 5' 69																misc_RNA_3465 44 3' UCGGUUAGAUAAUUAGUA 5' 27
|||| |||||||||																||| ||||||| |||
N646_1320 -35 5' GAAAAACGCGAAGUCA 3' -20																N646_4551 24 5' UGCCCCUCUAUUAUUCAA 3' 41
Energy: -13.58																Energy: -11.3
p-value: 0.002																p-value: 0.012
543943234 gene product: thiol:disulfide interchange protein DsbE																543974682 gene product: hypothetical protein
%%%%%%%%%%%%%%%%%%%%%%%%%%%%%%%%%%%%%%%%%%%%%%%%%%%%%%%%%%%%%%%%%%%%%%%%%%%%%%%%																%%%%%%%%%%%%%%%%%%%%%%%%%%%%%%%%%%%%%%%%%%%%%%%%%%%%%%%%%%%%%%%%%%%%%%%%%%%%%%%%
N646_2230 5																N646_4686 6
misc_RNA_3465 52 3' GUUA-UACUCGGUUAGA 5' 36																misc_RNA_3465 30 3' AGUAGUCUUUCCUG-UUUUC 5' 12
:||| |||||||||||																|||| ||||||| ||||
N646_2230 -5 5' UAAUCAUGAGCCAAUCA 3' 12																N646_4686 -20 5' ACAUCUCAAAGGACUAAAAA 3' -1
Energy: -11.75																Energy: -11.27
p-value: 0.009																p-value: 0.012
543944123 gene product: peptide ABC transporter, permease protein																543974817 gene product: hypothetical protein
%%%%%%%%%%%%%%%%%%%%%%%%%%%%%%%%%%%%%%%%%%%%%%%%%%%%%%%%%%%%%%%%%%%%%%%%%%%%%%%%																%%%%%%%%%%%%%%%%%%%%%%%%%%%%%%%%%%%%%%%%%%%%%%%%%%%%%%%%%%%%%%%%%%%%%%%%%%%%%%%%
N646_1334 6																N646_3113 7
misc_RNA_3465 74 3' UUCAGAUAAGUCUUACUU 5' 57																misc_RNA_3465 44 3' UCGGUUAGAUAAUUAGUAG- 5' 26
::|||||||||||||||																||:|||||||| ||:||
N646_1334 -13 5' GGGUCUAUUCAGAAUGAU 3' 5																N646_3113 75 5' UGCUAAUCUAUU--UCGUCG 3' 92
Energy: -11.44																Energy: -11.14
p-value: 0.011																p-value: 0.013
543943248 gene product: chemotaxis protein CheZ																543973245 gene product: hypothetical protein
%%%%%%%%%%%%%%%%%%%%%%%%%%%%%%%%%%%%%%%%%%%%%%%%%%%%%%%%%%%%%%%%%%%%%%%%%%%%%%%%																%%%%%%%%%%%%%%%%%%%%%%%%%%%%%%%%%%%%%%%%%%%%%%%%%%%%%%%%%%%%%%%%%%%%%%%%%%%%%%%%
N646_0016 7																N646_3505 8
misc_RNA_3465 44 3' UCGGUUAGAUAAUUAGUAGU 5' 25																misc_RNA_3465 44 3' UCGGUUAGAUAA 5' 33
|||| |||||| ||::||																||||||||||
N646_0016 9 5' CGCCAUUCUAUU-AUUGUCU 3' 27																N646_3505 2 5' UGCCAAUCUAUC 3' 13
Energy: -11.25																Energy: -11.04
p-value: 0.012																p-value: 0.013
543941930 gene product: putative outer membrane protein																543973637 gene product: Na+/H+ antiporter
%%%%%%%%%%%%%%%%%%%%%%%%%%%%%%%%%%%%%%%%%%%%%%%%%%%%%%%%%%%%%%%%%%%%%%%%%%%%%%%%																%%%%%%%%%%%%%%%%%%%%%%%%%%%%%%%%%%%%%%%%%%%%%%%%%%%%%%%%%%%%%%%%%%%%%%%%%%%%%%%%
N646_1776 8																N646_3154 9
misc_RNA_3465 85 3' CUUU-GAGCGCUUCAG 5' 70																misc_RNA_3465 30 3' AGUAGUCUUUCCUGU 5' 16
|||| :|||||||||																:|||||||:||||:
N646_1776 -96 5' GAAAUUUCGCGAAGUA 3' -81																N646_3154 -59 5' GUAUCAGAAGGGACG 3' -45
Energy: -11.1																Energy: -10.53
p-value: 0.013																p-value: 0.018
543943688 gene product: putative carbon-nitrogen hydrolase																543973286 gene product: DNA-binding response regulator KdpE
%%%%%%%%%%%%%%%%%%%%%%%%%%%%%%%%%%%%%%%%%%%%%%%%%%%%%%%%%%%%%%%%%%%%%%%%%%%%%%%%																%%%%%%%%%%%%%%%%%%%%%%%%%%%%%%%%%%%%%%%%%%%%%%%%%%%%%%%%%%%%%%%%%%%%%%%%%%%%%%%%
N646_2091 9																N646_4083 10
misc_RNA_3465 78 3' GCGCUUCAGAUAAGUCU 5' 62																misc_RNA_3465 51 3' GUUAUACUCGGUUAG 5' 37
|: ||||||||||||																|:||| ||||||||
N646_2091 18 5' AGUAAAGUCUAUUCAGC 3' 34																N646_4083 -53 5' CGAUAAGAGCCAAUA 3' -38
Energy: -10.67																Energy: -10.28
p-value: 0.017																p-value: 0.020
543943989 gene product: NAD(P)H-flavin reductase																543974214 gene product: hypothetical protein
%%%%%%%%%%%%%%%%%%%%%%%%%%%%%%%%%%%%%%%%%%%%%%%%%%%%%%%%%%%%%%%%%%%%%%%%%%%%%%%%																%%%%%%%%%%%%%%%%%%%%%%%%%%%%%%%%%%%%%%%%%%%%%%%%%%%%%%%%%%%%%%%%%%%%%%%%%%%%%%%%
N646_2234 10																N646_4470 11
misc_RNA_3465 56 3' ACAUUGUUAUACUCGG 5' 41																misc_RNA_3465 48 3' AUACUCGGUUA 5' 38
|| ||||||||||																|||||||||
N646_2234 136 5' CGU--CAAUAUGAGCG 3' 149																N646_4470 -125 5' GAUGAGCCAAA 3' -115
Energy: -10.65																Energy: -9.96
p-value: 0.017																p-value: 0.024
543944127 gene product: hypothetical protein																543974601 gene product: hypothetical protein
%%%%%%%%%%%%%%%%%%%%%%%%%%%%%%%%%%%%%%%%%%%%%%%%%%%%%%%%%%%%%%%%%%%%%%%%%%%%%%%%																%%%%%%%%%%%%%%%%%%%%%%%%%%%%%%%%%%%%%%%%%%%%%%%%%%%%%%%%%%%%%%%%%%%%%%%%%%%%%%%%
N646_3023 11																N646_4055 12
misc_RNA_3465 54 3' AUUGUUAUACUCGGU 5' 40																misc_RNA_3465 29 3' GUAGUCUUUCCUG-UUUUCC 5' 11
|:|||||||||:|																||:| ||||||| :||||
N646_3023 58 5' GAGCAAUAUGAGUCU 3' 72																N646_4055 -22 5' AAUUAAAAAGGACUGAAAGA 3' -3
Energy: -10.62																Energy: -9.8
p-value: 0.017																p-value: 0.026
543944914 gene product: acyl-CoA synthase																543974186 gene product: enoyl-CoA hydratase
%%%%%%%%%%%%%%%%%%%%%%%%%%%%%%%%%%%%%%%%%%%%%%%%%%%%%%%%%%%%%%%%%%%%%%%%%%%%%%%%																%%%%%%%%%%%%%%%%%%%%%%%%%%%%%%%%%%%%%%%%%%%%%%%%%%%%%%%%%%%%%%%%%%%%%%%%%%%%%%%%
N646_0855 12																N646_3447 13
misc_RNA_3465 46 3' ACUCGGUUAGAUAA 5' 33																misc_RNA_3465 22 3' UUCCUGUUUUCC 5' 11
||||||||||||																||||||||||
N646_0855 -131 5' AGAGCCAAUCUAUG 3' -118																N646_3447 -140 5' CAGGACAAAAGU 3' -129
Energy: -10.56																Energy: -9.64
p-value: 0.018																p-value: 0.028
543942769 gene product: hypothetical protein																543973579 gene product: hypothetical protein
%%%%%%%%%%%%%%%%%%%%%%%%%%%%%%%%%%%%%%%%%%%%%%%%%%%%%%%%%%%%%%%%%%%%%%%%%%%%%%%%																%%%%%%%%%%%%%%%%%%%%%%%%%%%%%%%%%%%%%%%%%%%%%%%%%%%%%%%%%%%%%%%%%%%%%%%%%%%%%%%%
N646_2605 13																N646_4021 14
misc_RNA_3465 74 3' UUCAGAUAAGUCUU-ACU-UACA 5' 54																misc_RNA_3465 46 3' ACUCGGUUAGA 5' 36
|||||:||||||| | | |||																| |||||||
N646_2605 127 5' CAGUCUGUUCAGAACU-AUAUG- 3' 147																N646_4021 12 5' AGUGCCAAUCA 3' 22
Energy: -10.5																Energy: -9.57
p-value: 0.018																p-value: 0.029
543944498 gene product: putative lipoprotein																543974152 gene product: electron transfer flavoprotein, beta-subunit
%%%%%%%%%%%%%%%%%%%%%%%%%%%%%%%%%%%%%%%%%%%%%%%%%%%%%%%%%%%%%%%%%%%%%%%%%%%%%%%%																%%%%%%%%%%%%%%%%%%%%%%%%%%%%%%%%%%%%%%%%%%%%%%%%%%%%%%%%%%%%%%%%%%%%%%%%%%%%%%%%
N646_2382 14																N646_3159 15
misc_RNA_3465 75 3' CUUCAGAUAAGUCUUA 5' 60																misc_RNA_3465 54 3' AUUGUUAUACUCGGUU 5' 39
||| ||||||||||																||| |||||||:||
N646_2382 49 5' CAAG-CUAUUCAGAAA 3' 63																N646_3159 -80 5' AAACUAUAUGAGUCAC 3' -65
Energy: -10.06																Energy: -9.35
p-value: 0.023																p-value: 0.032
543944275 gene product: lipopolysaccharide biosynthesis protein																543973291 gene product: iron(III) ABC transporter, periplasmic iron-compound-binding protein
%%%%%%%%%%%%%%%%%%%%%%%%%%%%%%%%%%%%%%%%%%%%%%%%%%%%%%%%%%%%%%%%%%%%%%%%%%%%%%%%																%%%%%%%%%%%%%%%%%%%%%%%%%%%%%%%%%%%%%%%%%%%%%%%%%%%%%%%%%%%%%%%%%%%%%%%%%%%%%%%%
N646_0440 15																N646_4433 16
misc_RNA_3465 54 3' AUUGUUAU-ACUCGGU 5' 40																misc_RNA_3465 56 3' ACAUUGUUAUACUCGG 5' 41
||||||| ||||||																| :: |||||||||
N646_0440 -120 5' CAACAAUAUUGAGCC- 3' -106																N646_4433 -9 5' CGAGGGAAUAUGAGCA 3' 7
Energy: -9.89																Energy: -9.28
p-value: 0.025																p-value: 0.033
543942354 gene product: DNA polymerase III subunit epsilon																543974564 gene product: hypothetical protein
%%%%%%%%%%%%%%%%%%%%%%%%%%%%%%%%%%%%%%%%%%%%%%%%%%%%%%%%%%%%%%%%%%%%%%%%%%%%%%%%																%%%%%%%%%%%%%%%%%%%%%%%%%%%%%%%%%%%%%%%%%%%%%%%%%%%%%%%%%%%%%%%%%%%%%%%%%%%%%%%%
N646_1350 16																N646_3604 17
misc_RNA_3465 52 3' GUUAU-ACUCGGUUAGA 5' 36																misc_RNA_3465 35 3' UAAUUAGUAGUCUU 5' 22
||||| |||||||||:																||||||||:|||
N646_1350 18 5' CAAUAUUGAGCCAAUUC 3' 34																N646_3604 -138 5' UUUAAUCAUUAGAC 3' -125
Energy: -9.58																Energy: -9.21
p-value: 0.029																p-value: 0.034
543943264 gene product: hypothetical protein																543973735 gene product: arginine decarboxylase
%%%%%%%%%%%%%%%%%%%%%%%%%%%%%%%%%%%%%%%%%%%%%%%%%%%%%%%%%%%%%%%%%%%%%%%%%%%%%%%%																%%%%%%%%%%%%%%%%%%%%%%%%%%%%%%%%%%%%%%%%%%%%%%%%%%%%%%%%%%%%%%%%%%%%%%%%%%%%%%%%
N646_2243 17																N646_3571 18
misc_RNA_3465 46 3' ACUCGGUUAGA 5' 36																misc_RNA_3465 48 3' AUACUCGGUUA 5' 38
||||||||:																|||||||||
N646_2243 -136 5' AGAGCCAAUUC 3' -126																N646_3571 -1 5' AAUGAGCCAAG 3' 10
Energy: -9.58																Energy: -9.2
p-value: 0.029																p-value: 0.034
543944136 gene product: phosphogluconate dehydratase																543973703 gene product: hypothetical protein
%%%%%%%%%%%%%%%%%%%%%%%%%%%%%%%%%%%%%%%%%%%%%%%%%%%%%%%%%%%%%%%%%%%%%%%%%%%%%%%%																%%%%%%%%%%%%%%%%%%%%%%%%%%%%%%%%%%%%%%%%%%%%%%%%%%%%%%%%%%%%%%%%%%%%%%%%%%%%%%%%
N646_1371 18																N646_4001 19
misc_RNA_3465 78 3' GCGCUUCAGA 5' 69																misc_RNA_3465 30 3' AGUAG--UCUUUCCUGUU 5' 15
||||||||																|||| ||||||| ||
N646_1371 139 5' GGCGAAGUCA 3' 148																N646_4001 128 5' GCAUCGAAGAAAGG-CAU 3' 144
Energy: -9.53																Energy: -9.11
p-value: 0.029																p-value: 0.035
543943285 gene product: putative outer membrane lipoprotein																543974132 gene product: hypothetical protein
%%%%%%%%%%%%%%%%%%%%%%%%%%%%%%%%%%%%%%%%%%%%%%%%%%%%%%%%%%%%%%%%%%%%%%%%%%%%%%%%																%%%%%%%%%%%%%%%%%%%%%%%%%%%%%%%%%%%%%%%%%%%%%%%%%%%%%%%%%%%%%%%%%%%%%%%%%%%%%%%%
N646_2264 19																N646_4544 20
misc_RNA_3465 55 3' CAUUGUUAUACUCGGUU 5' 39																misc_RNA_3465 27 3' AGUCUUUCCUGUUU 5' 14
||:|||||||||::|																||||||||||||
N646_2264 -8 5' AUAGCAAUAUGAGUUAC 3' 9																N646_4544 -92 5' CCAGAAAGGACAAU 3' -79
Energy: -9.31																Energy: -9.07
p-value: 0.032																p-value: 0.036
543944157 gene product: universal stress protein A																543974675 gene product: hypothetical protein
%%%%%%%%%%%%%%%%%%%%%%%%%%%%%%%%%%%%%%%%%%%%%%%%%%%%%%%%%%%%%%%%%%%%%%%%%%%%%%%%																%%%%%%%%%%%%%%%%%%%%%%%%%%%%%%%%%%%%%%%%%%%%%%%%%%%%%%%%%%%%%%%%%%%%%%%%%%%%%%%%
N646_3052 20																N646_4248 21
misc_RNA_3465 69 3' AUAAGUCUUACUUA 5' 56																misc_RNA_3465 51 3' GUUAUACUCGGUUAGA 5' 36
||||||||||||																|||| ||||||||||
N646_3052 -8 5' AAUUCAGAAUGAAA 3' 6																N646_4248 36 5' CAAU-UGAGCCAAUCG 3' 51
Energy: -9.26																Energy: -9.07
p-value: 0.033																p-value: 0.036
543944943 gene product: putative oxidoreductase protein																543974379 gene product: hypothetical protein
%%%%%%%%%%%%%%%%%%%%%%%%%%%%%%%%%%%%%%%%%%%%%%%%%%%%%%%%%%%%%%%%%%%%%%%%%%%%%%%%																%%%%%%%%%%%%%%%%%%%%%%%%%%%%%%%%%%%%%%%%%%%%%%%%%%%%%%%%%%%%%%%%%%%%%%%%%%%%%%%%
N646_1323 21																N646_3634 22
misc_RNA_3465 33 3' AUUAGUAGUC-UUUCC 5' 19																misc_RNA_3465 29 3' GUAGUCUUUCCUGUUU 5' 14
||||||||| ||||																|||||||||| :||
N646_1323 -76 5' AAAUCAUCAGUAAAGA 3' -61																N646_3634 -48 5' AAUCAGAAAGG-UAAC 3' -34
Energy: -9.15																Energy: -9.03
p-value: 0.035																p-value: 0.037
543943237 gene product: heme exporter protein D																543973765 gene product: hypothetical protein
%%%%%%%%%%%%%%%%%%%%%%%%%%%%%%%%%%%%%%%%%%%%%%%%%%%%%%%%%%%%%%%%%%%%%%%%%%%%%%%%																%%%%%%%%%%%%%%%%%%%%%%%%%%%%%%%%%%%%%%%%%%%%%%%%%%%%%%%%%%%%%%%%%%%%%%%%%%%%%%%%
N646_0145 22																N646_4230 23
misc_RNA_3465 42 3' GGUUAGAUAAUUAGUA 5' 27																misc_RNA_3465 67 3' AAGUCUUACUUACAUUGUUA 5' 48
|:||||||||||:|																||| :||||||| |||||
N646_0145 -28 5' GCGAUCUAUUAAUUAC 3' -13																N646_4230 -6 5' AUCAAGAUGAAUG-AACAAC 3' 13
Energy: -9.14																Energy: -8.79
p-value: 0.035																p-value: 0.041
543942059 gene product: tryptophanyl-tRNA synthetase																543974361 gene product: hypothetical protein
%%%%%%%%%%%%%%%%%%%%%%%%%%%%%%%%%%%%%%%%%%%%%%%%%%%%%%%%%%%%%%%%%%%%%%%%%%%%%%%%																%%%%%%%%%%%%%%%%%%%%%%%%%%%%%%%%%%%%%%%%%%%%%%%%%%%%%%%%%%%%%%%%%%%%%%%%%%%%%%%%
N646_0589 23																N646_4179 24
misc_RNA_3465 103 3' UUUC-GCUCAAAGGACU 5' 88																misc_RNA_3465 71 3' AGAUAAGUCUUAC 5' 59
|||| :||||||||||																|||||||||||
N646_0589 -46 5' AAAGUUGAGUUUCCUGC 3' -30																N646_4179 17 5' ACUAUUCAGAAUC 3' 29
Energy: -9.12																Energy: -8.66
p-value: 0.035																p-value: 0.043
543942503 gene product: cation transport ATPase, E1-E2 family protein																543974310 gene product: hypothetical protein
%%%%%%%%%%%%%%%%%%%%%%%%%%%%%%%%%%%%%%%%%%%%%%%%%%%%%%%%%%%%%%%%%%%%%%%%%%%%%%%%																%%%%%%%%%%%%%%%%%%%%%%%%%%%%%%%%%%%%%%%%%%%%%%%%%%%%%%%%%%%%%%%%%%%%%%%%%%%%%%%%
N646_0194 24																N646_3167 25
misc_RNA_3465 15 3' UUUCCAACAGAU-AAG 5' 1																misc_RNA_3465 78 3' GCGCUUCAGAUA 5' 67
:|||||||:|: ||:																|||||||:||
N646_0194 -45 5' UGAGGUUGUUUGUUUU 3' -30																N646_3167 -42 5' GGCGAAGUUUAA 3' -31
Energy: -9.11																Energy: -8.61
p-value: 0.036																p-value: 0.044
543942108 gene product: hypothetical protein																543973299 gene product: hypothetical protein
%%%%%%%%%%%%%%%%%%%%%%%%%%%%%%%%%%%%%%%%%%%%%%%%%%%%%%%%%%%%%%%%%%%%%%%%%%%%%%%%																%%%%%%%%%%%%%%%%%%%%%%%%%%%%%%%%%%%%%%%%%%%%%%%%%%%%%%%%%%%%%%%%%%%%%%%%%%%%%%%%
N646_0503 25																N646_3232 26
misc_RNA_3465 54 3' UUG-UUAUACUCGGUUA-GAUA 5' 34																misc_RNA_3465 76 3' GCUUCAGAUAAGUCUU 5' 61
||| ||||||||||||| ||:																|:| ||||||||||
N646_0503 -56 5' AACAAAUAUGAGCCAAUACUG- 3' -36																N646_3232 11 5' AGGAAUCUAUUCAGAC 3' 26
Energy: -9.1																Energy: -8.43
p-value: 0.036																p-value: 0.047
543942417 gene product: hypothetical protein																543973364 gene product: ScrA (aminotransferase)
%%%%%%%%%%%%%%%%%%%%%%%%%%%%%%%%%%%%%%%%%%%%%%%%%%%%%%%%%%%%%%%%%%%%%%%%%%%%%%%%																%%%%%%%%%%%%%%%%%%%%%%%%%%%%%%%%%%%%%%%%%%%%%%%%%%%%%%%%%%%%%%%%%%%%%%%%%%%%%%%%
N646_1565 26																N646_4240 27
misc_RNA_3465 73 3' UCAGAUAAGUCUUACUUACA 5' 54																misc_RNA_3465 102 3' UUCGCUCAAAGGA 5' 90
|||||||||||||| |||																||:|||||||:
N646_1565 -16 5' UGUCUAUUCAGAAUGUAUG- 3' 3																N646_4240 96 5' UAGUGAGUUUCUA 3' 108
Energy: -9.06																Energy: -8.35
p-value: 0.036																p-value: 0.049
543943479 gene product: hypothetical protein																543974371 gene product: hypothetical protein
%%%%%%%%%%%%%%%%%%%%%%%%%%%%%%%%%%%%%%%%%%%%%%%%%%%%%%%%%%%%%%%%%%%%%%%%%%%%%%%%																%%%%%%%%%%%%%%%%%%%%%%%%%%%%%%%%%%%%%%%%%%%%%%%%%%%%%%%%%%%%%%%%%%%%%%%%%%%%%%%%
N646_0526 27																N646_4503 28
misc_RNA_3465 51 3' GUUAUACUCGGUUAGA 5' 36																misc_RNA_3465 65 3' GUCUUACUUACA 5' 54
|:| ||||||| ||																::|||||||||
N646_0526 103 5' AAGUUUGAGCCAUUCG 3' 118																N646_4503 133 5' UGGAAUGAAUGG 3' 144
Energy: -8.96																Energy: -8.34
p-value: 0.038																p-value: 0.049
543942440 gene product: putative galactosyltransferase																543974634 gene product: cytochrome o ubiquinol oxidase, subunit I
%%%%%%%%%%%%%%%%%%%%%%%%%%%%%%%%%%%%%%%%%%%%%%%%%%%%%%%%%%%%%%%%%%%%%%%%%%%%%%%%
N646_0804 28
misc_RNA_3465 21 3' UCCUGUU-UUCCAACA 5' 7
||| || |||||||
N646_0804 69 5' CGGA-AAUAAGGUUGA 3' 83
Energy: -8.73
p-value: 0.042
543942718 gene product: putative alanyl-tRNA synthetase
%%%%%%%%%%%%%%%%%%%%%%%%%%%%%%%%%%%%%%%%%%%%%%%%%%%%%%%%%%%%%%%%%%%%%%%%%%%%%%%%
N646_2788 29
misc_RNA_3465 54 3' UUGUUAUACUCGGUU- 5' 39
||||||||| ||:||
N646_2788 -150 5' AACAAUAUG-GCUAAU 3' -136
Energy: -8.71
p-value: 0.042
543944679 gene product: hypothetical protein
%%%%%%%%%%%%%%%%%%%%%%%%%%%%%%%%%%%%%%%%%%%%%%%%%%%%%%%%%%%%%%%%%%%%%%%%%%%%%%%%
N646_0557 30
misc_RNA_3465 31 3' UAGUAGUCUUUCC-UGUU 5' 15
|||||::|||||| |||
N646_0557 -24 5' AUCAUUGGAAAGGAACAC 3' -7
Energy: -8.63
p-value: 0.044
543942471 gene product: hypothetical protein
%%%%%%%%%%%%%%%%%%%%%%%%%%%%%%%%%%%%%%%%%%%%%%%%%%%%%%%%%%%%%%%%%%%%%%%%%%%%%%%%
N646_1299 31
misc_RNA_3465 27 3' AGUCUUUCCUGUUUUC 5' 12
|:|| :||||||||:
N646_1299 133 5' UUAGCGAGGACAAAGA 3' 149
Energy: -8.61
p-value: 0.044
543943213 gene product: hypothetical protein
%%%%%%%%%%%%%%%%%%%%%%%%%%%%%%%%%%%%%%%%%%%%%%%%%%%%%%%%%%%%%%%%%%%%%%%%%%%%%%%%
N646_2882 32
misc_RNA_3465 45 3' CUCGGUUAGAUAA 5' 33
|||||||||:|
N646_2882 -61 5' UAGCCAAUCUGUA 3' -49
Energy: -8.61
p-value: 0.044
543944773 gene product: hypothetical protein
%%%%%%%%%%%%%%%%%%%%%%%%%%%%%%%%%%%%%%%%%%%%%%%%%%%%%%%%%%%%%%%%%%%%%%%%%%%%%%%%
N646_1035 33
misc_RNA_3465 48 3' AUACUCGGUUAGAU 5' 35
||||||||:|:|
N646_1035 -1 5' AAUGAGCCAGUUUU 3' 13
Energy: -8.59
p-value: 0.044
543942949 gene product: putative translation factor
%%%%%%%%%%%%%%%%%%%%%%%%%%%%%%%%%%%%%%%%%%%%%%%%%%%%%%%%%%%%%%%%%%%%%%%%%%%%%%%%
N646_0734 34
misc_RNA_3465 27 3' AGUCUUUCCUGUUUU 5' 13
|:||||||||:||
N646_0734 -16 5' CCGGAAAGGACGAAU 3' -2
Energy: -8.56
p-value: 0.045
543942648 gene product: hypothetical protein
%%%%%%%%%%%%%%%%%%%%%%%%%%%%%%%%%%%%%%%%%%%%%%%%%%%%%%%%%%%%%%%%%%%%%%%%%%%%%%%%
N646_1379 35
misc_RNA_3465 26 3' GUCUUUCCUGUUUUC 5' 12
|||||||||||:|
N646_1379 -23 5' AAGAAAGGACAAGAA 3' -9
Energy: -8.51
p-value: 0.046
543943293 gene product: putative glycine cleavage system transcriptional repressor
%%%%%%%%%%%%%%%%%%%%%%%%%%%%%%%%%%%%%%%%%%%%%%%%%%%%%%%%%%%%%%%%%%%%%%%%%%%%%%%%
N646_2055 36
misc_RNA_3465 12 3' CCAACAGAUAAG- 5' 1
|||||||||||
N646_2055 68 5' UGUUGUCUAUUCU 3' 80
Energy: -8.38
p-value: 0.048
543943955 gene product: hypothetical protein
%%%%%%%%%%%%%%%%%%%%%%%%%%%%%%%%%%%%%%%%%%%%%%%%%%%%%%%%%%%%%%%%%%%%%%%%%%%%%%%%
N646_2415 37
misc_RNA_3465 54 3' AUUGUUAUACUCGG 5' 41
:|||:|||||||
N646_2415 -7 5' AGACAGUAUGAGCG 3' 7
Energy: -8.33
p-value: 0.049
543944308 gene product: hypothetical protein
%%%%%%%%%%%%%%%%%%%%%%%%%%%%%%%%%%%%%%%%%%%%%%%%%%%%%%%%%%%%%%%%%%%%%%%%%%%%%%%%
N646_0768 38
misc_RNA_3465 31 3' UAGUAGUCUUUCC 5' 19
|||||||||||
N646_0768 120 5' CUCAUCAGAAAGC 3' 132
Energy: -8.3
p-value: 0.050
543942682 gene product: hypothetical protein

## Sheet: targetRNA2
****************************************													****************************************
PROGRAM PARAMETERS													PROGRAM PARAMETERS
TargetRNA version:			2.01										TargetRNA version: 2.01
Replicon:				Vibrio alginolyticus NBRC 15630 = ATCC 17749 chromosome 2									Replicon: Vibrio alginolyticus NBRC 15630 = ATCC 17749 chromosome 1
NTs before start codon:			200										NTs before start codon: 200
NTs after start codon:			100										NTs after start codon: 100
Seed length:				7									Seed length: 7
sRNA conservation and accessibility:	TRUE												sRNA conservation and accessibility: true
sRNA window size:			13										sRNA window size: 13
mRNA structural accessibility:		TRUE											mRNA structural accessibility: true
Interaction region:			20										Interaction region: 20
Filter size:				400									Filter size: 400
Single target:				-									Single target: -
File of candidate targets:		-											File of candidate targets: -
p-value:				0.05									p-value: 0.05
****************************************													****************************************
Rank	Gene	Synonym	Energy	Pvalue	sRNA_start	sRNA_stop	mRNA_start	mRNA_stop					Rank Gene Synonym Energy Pvalue sRNA_start sRNA_stop mRNA_start mRNA_stop
1	-	N646_4534	-12.82	0.004	87	105	-143	-126					1 - N646_1196 -16.46 0.000 38 53 -6 10
2	-	N646_4455	-11.62	0.01	88	107	81	97					2 - N646_1652 -13.69 0.002 12 26 -15 -1
3	-	N646_4042	-11.58	0.01	36	46	-134	-124					3 - N646_1320 -13.58 0.002 69 84 -35 -20
4	-	N646_3168	-11.52	0.01	37	53	-103	-88					4 - N646_1087 -12.19 0.007 30 46 -177 -161
5	-	N646_4295	-11.49	0.01	37	52	-148	-133					5 - N646_2820 -12.17 0.007 69 80 -156 -145
6	-	N646_4551	-11.3	0.012	27	44	24	41					6 - N646_1741 -12.13 0.007 20 33 -169 -156
7	-	N646_4686	-11.27	0.012	12	30	-20	-1					7 - N646_0217 -12.12 0.007 64 79 -181 -165
8	-	N646_3505	-11.04	0.013	33	44	2	13					8 - N646_2230 -11.75 0.009 36 52 -5 12
9	-	N646_3154	-10.53	0.018	16	30	-59	-45					9 - N646_1334 -11.44 0.011 57 74 -13 5
10	-	N646_3584	-10.5	0.018	17	32	-159	-144					10 - N646_3023 -11.34 0.011 40 54 58 72
11	-	N646_4478	-10.46	0.018	25	43	-128	-110					11 - N646_0016 -11.25 0.012 25 44 9 27
12	-	N646_3200	-10.42	0.019	12	26	82	96					12 - N646_1776 -11.1 0.013 70 85 -96 -81
13	-	N646_4195	-10.29	0.02	36	45	87	96					13 - N646_2762 -10.73 0.016 17 27 -16 -6
14	-	N646_4083	-10.28	0.02	37	51	-53	-38					14 - N646_2091 -10.67 0.017 62 78 18 34
15	-	N646_3113	-9.81	0.026	26	44	75	92					15 - N646_0855 -10.61 0.017 33 46 -131 -118
16	-	N646_4055	-9.8	0.026	11	29	-22	-3					16 - N646_0666 -10.4 0.019 40 54 83 100
17	-	N646_4327	-9.74	0.026	35	45	-149	-139					17 - N646_1720 -10.27 0.020 36 46 -171 -161
18	-	N646_4328	-9.59	0.028	35	45	57	67					18 - N646_2480 -10.17 0.021 14 26 -178 -166
19	-	N646_4021	-9.57	0.029	36	46	12	22					19 - N646_1350 -9.58 0.029 36 52 18 34
20	-	N646_4470	-9.5	0.03	38	48	-125	-115					20 - N646_2122 -9.52 0.029 61 78 79 96
21	-	N646_3159	-9.35	0.032	39	54	-80	-65					21 - N646_1033 -9.36 0.032 13 27 -191 -176
22	-	N646_4433	-9.28	0.033	41	56	-9	7					22 - N646_2264 -9.31 0.032 39 55 -8 9
23	-	N646_4248	-9.24	0.033	36	51	36	51					23 - N646_3052 -9.26 0.033 56 69 -8 6
24	-	N646_3571	-9.2	0.034	38	48	-1	10					24 - N646_1512 -9.22 0.034 40 52 -183 -171
25	-	N646_4544	-9.07	0.036	14	27	-92	-79					25 - N646_1323 -9.15 0.035 19 33 -76 -61
26	-	N646_3634	-9.03	0.037	14	29	-48	-34					26 - N646_0145 -9.14 0.035 27 42 -28 -13
27	-	N646_3138	-8.86	0.04	9	20	86	97					27 - N646_0589 -9.12 0.035 88 103 -46 -30
28	-	N646_4230	-8.79	0.041	48	67	-6	13					28 - N646_0194 -9.11 0.036 1 15 -45 -30
29	-	N646_4179	-8.66	0.043	59	71	17	29					29 - N646_0503 -9.1 0.036 34 54 -56 -36
30	-	N646_3167	-8.61	0.044	67	78	-42	-31					30 - N646_1565 -9.06 0.036 54 73 -16 3
31	-	N646_3232	-8.43	0.047	61	76	11	26					31 - N646_0714 -9.02 0.037 40 57 -195 -177
32	-	N646_3472	-8.31	0.05	34	45	-96	-85					32 - N646_1091 -8.94 0.038 69 78 -161 -152
													33 - N646_0440 -8.89 0.039 40 54 -120 -106
%%%%%%%%%%%%%%%%%%%%%%%%%%%%%%%%%%%%%%%%%%%%%%%%%%%%%%%%%%%%%%%%%%%%%%%%%%%%%%%%													34 - N646_0557 -8.63 0.044 15 31 -24 -7
N646_4534 1													35 - N646_2669 -8.62 0.044 16 30 80 94
	misc_RNA_3465	105	3' UUUUUCGCUCAAAGGACUC- 5'	87									36 - N646_2882 -8.61 0.044 33 45 -61 -49
			:||:||||| || |||||										37 - N646_1035 -8.59 0.044 35 48 -1 13
	N646_4534	-143	5' CGAAGGCGAG-UU-CUGAGA 3'	-126									38 - N646_0734 -8.56 0.045 13 27 -16 -2
													39 - N646_1379 -8.51 0.046 12 26 -23 -9
Energy:			-12.82										40 - N646_2415 -8.33 0.049 41 54 -7 7
p-value:		0.004
543974665 gene product:	hypothetical protein												%%%%%%%%%%%%%%%%%%%%%%%%%%%%%%%%%%%%%%%%%%%%%%%%%%%%%%%%%%%%%%%%%%%%%%%%%%%%%%%%
													N646_1196 1
%%%%%%%%%%%%%%%%%%%%%%%%%%%%%%%%%%%%%%%%%%%%%%%%%%%%%%%%%%%%%%%%%%%%%%%%%%%%%%%%													misc_RNA_3465 53 3' UUGUUAUACUCGGUUA 5' 38
N646_4455 2													|||:||||||||||
	misc_RNA_3465	107	3' UUUUUUUCGCUCAAAG-GACU 5'	88									N646_1196 -6 5' UACAGUAUGAGCCAAA 3' 10
			||||||||||| | |||
	N646_4455	81	5' CAAAAAAGCGAG---CACUG- 3'	97									Energy: -16.46
													p-value: 0.000
Energy:			-11.62										543943110 gene product: hypothetical protein
p-value:		0.01
543974586 gene product:	hypothetical protein												%%%%%%%%%%%%%%%%%%%%%%%%%%%%%%%%%%%%%%%%%%%%%%%%%%%%%%%%%%%%%%%%%%%%%%%%%%%%%%%%
													N646_1652 2
%%%%%%%%%%%%%%%%%%%%%%%%%%%%%%%%%%%%%%%%%%%%%%%%%%%%%%%%%%%%%%%%%%%%%%%%%%%%%%%%													misc_RNA_3465 26 3' GUCUUUCCUGUUUUC 5' 12
N646_4042 3													||||||||:|:||
	misc_RNA_3465	46	3' ACUCGGUUAGA 5'	36									N646_1652 -15 5' AAGAAAGGAUAGAAA 3' -1
			|||||||||
	N646_4042	-134	5' CGAGCCAAUCA 3'	-124									Energy: -13.69
													p-value: 0.002
Energy:			-11.58										543943566 gene product: 2-C-methyl-D-erythritol 2,4-cyclodiphosphate synthase
p-value:		0.01
543974173 gene product:	putative acetyltransferase												%%%%%%%%%%%%%%%%%%%%%%%%%%%%%%%%%%%%%%%%%%%%%%%%%%%%%%%%%%%%%%%%%%%%%%%%%%%%%%%%
													N646_1320 3
%%%%%%%%%%%%%%%%%%%%%%%%%%%%%%%%%%%%%%%%%%%%%%%%%%%%%%%%%%%%%%%%%%%%%%%%%%%%%%%%													misc_RNA_3465 84 3' CUUUGAGCGCUUCAGA 5' 69
N646_3168 4													|||| |||||||||
	misc_RNA_3465	53	3' UUGUUAUACUCGGUUAG 5'	37									N646_1320 -35 5' GAAAAACGCGAAGUCA 3' -20
			|| |||||||||:||
	N646_3168	-103	5' UAC-AUAUGAGCCGAUA 3'	-88									Energy: -13.58
													p-value: 0.002
Energy:			-11.52										543943234 gene product: thiol:disulfide interchange protein DsbE
p-value:		0.01
543973300 gene product:	methyl-accepting chemotaxis protein												%%%%%%%%%%%%%%%%%%%%%%%%%%%%%%%%%%%%%%%%%%%%%%%%%%%%%%%%%%%%%%%%%%%%%%%%%%%%%%%%
													N646_1087 4
%%%%%%%%%%%%%%%%%%%%%%%%%%%%%%%%%%%%%%%%%%%%%%%%%%%%%%%%%%%%%%%%%%%%%%%%%%%%%%%%													misc_RNA_3465 46 3' ACUCGGUUAGAUAAUUA 5' 30
N646_4295 5													|||||||||||||:|
	misc_RNA_3465	52	3' UGUUAUACUCGGUUAG 5'	37									N646_1087 -177 5' CGAGCCAAUCUAUUGAA 3' -161
			|:||||||||||:|
	N646_4295	-148	5' UCGAUAUGAGCCAGUA 3'	-133									Energy: -12.19
													p-value: 0.007
Energy:			-11.49										543943001 gene product: putative membrane protein, suppressor for copper-sensitivity A
p-value:		0.01
543974426 gene product:	hypothetical protein												%%%%%%%%%%%%%%%%%%%%%%%%%%%%%%%%%%%%%%%%%%%%%%%%%%%%%%%%%%%%%%%%%%%%%%%%%%%%%%%%
													N646_2820 5
%%%%%%%%%%%%%%%%%%%%%%%%%%%%%%%%%%%%%%%%%%%%%%%%%%%%%%%%%%%%%%%%%%%%%%%%%%%%%%%%													misc_RNA_3465 80 3' GAGCGCUUCAGA 5' 69
N646_4551 6													||||||||||
	misc_RNA_3465	44	3' UCGGUUAGAUAAUUAGUA 5'	27									N646_2820 -156 5' GUCGCGAAGUCA 3' -145
			||| ||||||| |||
	N646_4551	24	5' UGCCCCUCUAUUAUUCAA 3'	41									Energy: -12.17
													p-value: 0.007
Energy:			-11.3										543944711 gene product: hypothetical protein
p-value:		0.012
543974682 gene product:	hypothetical protein												%%%%%%%%%%%%%%%%%%%%%%%%%%%%%%%%%%%%%%%%%%%%%%%%%%%%%%%%%%%%%%%%%%%%%%%%%%%%%%%%
													N646_1741 6
%%%%%%%%%%%%%%%%%%%%%%%%%%%%%%%%%%%%%%%%%%%%%%%%%%%%%%%%%%%%%%%%%%%%%%%%%%%%%%%%													misc_RNA_3465 33 3' AUUAGUAGUCUUUC 5' 20
N646_4686 7													||||||||||||
	misc_RNA_3465	30	3' AGUAGUCUUUCCUG-UUUUC 5'	12									N646_1741 -169 5' AAAUCAUCAGAAAA 3' -156
			|||| ||||||| ||||
	N646_4686	-20	5' ACAUCUCAAAGGACUAAAAA 3'	-1									Energy: -12.13
													p-value: 0.007
Energy:			-11.27										543943653 gene product: hypothetical protein
p-value:		0.012
543974817 gene product:	hypothetical protein												%%%%%%%%%%%%%%%%%%%%%%%%%%%%%%%%%%%%%%%%%%%%%%%%%%%%%%%%%%%%%%%%%%%%%%%%%%%%%%%%
													N646_0217 7
%%%%%%%%%%%%%%%%%%%%%%%%%%%%%%%%%%%%%%%%%%%%%%%%%%%%%%%%%%%%%%%%%%%%%%%%%%%%%%%%													misc_RNA_3465 79 3' AGCGCUUCAGAUAAGU 5' 64
N646_3505 8													|| ||:||||||||:
	misc_RNA_3465	44	3' UCGGUUAGAUAA 5'	33									N646_0217 -181 5' UCACGGAGUCUAUUUU 3' -165
			||||||||||
	N646_3505	2	5' UGCCAAUCUAUC 3'	13									Energy: -12.12
													p-value: 0.007
Energy:			-11.04										543942131 gene product: peptide ABC transporter, permease protein
p-value:		0.013
543973637 gene product:	Na+/H+ antiporter												%%%%%%%%%%%%%%%%%%%%%%%%%%%%%%%%%%%%%%%%%%%%%%%%%%%%%%%%%%%%%%%%%%%%%%%%%%%%%%%%
													N646_2230 8
%%%%%%%%%%%%%%%%%%%%%%%%%%%%%%%%%%%%%%%%%%%%%%%%%%%%%%%%%%%%%%%%%%%%%%%%%%%%%%%%													misc_RNA_3465 52 3' GUUA-UACUCGGUUAGA 5' 36
N646_3154 9													:||| |||||||||||
	misc_RNA_3465	30	3' AGUAGUCUUUCCUGU 5'	16									N646_2230 -5 5' UAAUCAUGAGCCAAUCA 3' 12
			:|||||||:||||:
	N646_3154	-59	5' GUAUCAGAAGGGACG 3'	-45									Energy: -11.75
													p-value: 0.009
Energy:			-10.53										543944123 gene product: peptide ABC transporter, permease protein
p-value:		0.018
543973286 gene product:	DNA-binding response regulator KdpE												%%%%%%%%%%%%%%%%%%%%%%%%%%%%%%%%%%%%%%%%%%%%%%%%%%%%%%%%%%%%%%%%%%%%%%%%%%%%%%%%
													N646_1334 9
%%%%%%%%%%%%%%%%%%%%%%%%%%%%%%%%%%%%%%%%%%%%%%%%%%%%%%%%%%%%%%%%%%%%%%%%%%%%%%%%													misc_RNA_3465 74 3' UUCAGAUAAGUCUUACUU 5' 57
N646_3584 10													::|||||||||||||||
	misc_RNA_3465	32	3' UUAGUAGUCUUUCCUG 5'	17									N646_1334 -13 5' GGGUCUAUUCAGAAUGAU 3' 5
			|||||||||:|| ||
	N646_3584	-159	5' CAUCAUCAGAGAGUAC 3'	-144									Energy: -11.44
													p-value: 0.011
Energy:			-10.5										543943248 gene product: chemotaxis protein CheZ
p-value:		0.018
543973715 gene product:	putative ferrichrome-iron receptor												%%%%%%%%%%%%%%%%%%%%%%%%%%%%%%%%%%%%%%%%%%%%%%%%%%%%%%%%%%%%%%%%%%%%%%%%%%%%%%%%
													N646_3023 10
%%%%%%%%%%%%%%%%%%%%%%%%%%%%%%%%%%%%%%%%%%%%%%%%%%%%%%%%%%%%%%%%%%%%%%%%%%%%%%%%													misc_RNA_3465 54 3' AUUGUUAUACUCGGU 5' 40
N646_4478 11													|:|||||||||:|
	misc_RNA_3465	43	3' CGGUUAGAUAAUUAGUAGU- 5'	25									N646_3023 58 5' GAGCAAUAUGAGUCU 3' 72
			|| |||||| |||:|||
	N646_4478	-128	5' UCCUUUCUAUU-AUCGUCAU 3'	-110									Energy: -11.34
													p-value: 0.011
Energy:			-10.46										543944914 gene product: acyl-CoA synthase
p-value:		0.018
543974609 gene product:	putative electron transfer flavoprotein, alpha subunit												%%%%%%%%%%%%%%%%%%%%%%%%%%%%%%%%%%%%%%%%%%%%%%%%%%%%%%%%%%%%%%%%%%%%%%%%%%%%%%%%
													N646_0016 11
%%%%%%%%%%%%%%%%%%%%%%%%%%%%%%%%%%%%%%%%%%%%%%%%%%%%%%%%%%%%%%%%%%%%%%%%%%%%%%%%													misc_RNA_3465 44 3' UCGGUUAGAUAAUUAGUAGU 5' 25
N646_3200 12													|||| |||||| ||::||
	misc_RNA_3465	26	3' GUCUUUCCUGUUUUC 5'	12									N646_0016 9 5' CGCCAUUCUAUU-AUUGUCU 3' 27
			|||||||| |:||
	N646_3200	82	5' GAGAAAGGAGAGAAA 3'	96									Energy: -11.25
													p-value: 0.012
Energy:			-10.42										543941930 gene product: putative outer membrane protein
p-value:		0.019
543973332 gene product:	ABC transporter, ATP-binding protein												%%%%%%%%%%%%%%%%%%%%%%%%%%%%%%%%%%%%%%%%%%%%%%%%%%%%%%%%%%%%%%%%%%%%%%%%%%%%%%%%
													N646_1776 12
%%%%%%%%%%%%%%%%%%%%%%%%%%%%%%%%%%%%%%%%%%%%%%%%%%%%%%%%%%%%%%%%%%%%%%%%%%%%%%%%													misc_RNA_3465 85 3' CUUU-GAGCGCUUCAG 5' 70
N646_4195 13													|||| :|||||||||
	misc_RNA_3465	45	3' CUCGGUUAGA 5'	36									N646_1776 -96 5' GAAAUUUCGCGAAGUA 3' -81
			||||||||
	N646_4195	87	5' UAGCCAAUCA 3'	96									Energy: -11.1
													p-value: 0.013
Energy:			-10.29										543943688 gene product: putative carbon-nitrogen hydrolase
p-value:		0.02
543974326 gene product:	hypothetical protein												%%%%%%%%%%%%%%%%%%%%%%%%%%%%%%%%%%%%%%%%%%%%%%%%%%%%%%%%%%%%%%%%%%%%%%%%%%%%%%%%
													N646_2762 13
%%%%%%%%%%%%%%%%%%%%%%%%%%%%%%%%%%%%%%%%%%%%%%%%%%%%%%%%%%%%%%%%%%%%%%%%%%%%%%%%													misc_RNA_3465 27 3' AGUCUUUCCUG 5' 17
N646_4083 14													|||||||||
	misc_RNA_3465	51	3' GUUAUACUCGGUUAG 5'	37									N646_2762 -16 5' ACAGAAAGGAA 3' -6
			|:||| ||||||||
	N646_4083	-53	5' CGAUAAGAGCCAAUA 3'	-38									Energy: -10.73
													p-value: 0.016
Energy:			-10.28										543944653 gene product: nucleoside diphosphate kinase
p-value:		0.02
543974214 gene product:	hypothetical protein												%%%%%%%%%%%%%%%%%%%%%%%%%%%%%%%%%%%%%%%%%%%%%%%%%%%%%%%%%%%%%%%%%%%%%%%%%%%%%%%%
													N646_2091 14
%%%%%%%%%%%%%%%%%%%%%%%%%%%%%%%%%%%%%%%%%%%%%%%%%%%%%%%%%%%%%%%%%%%%%%%%%%%%%%%%													misc_RNA_3465 78 3' GCGCUUCAGAUAAGUCU 5' 62
N646_3113 15													|: ||||||||||||
	misc_RNA_3465	44	3' UCGGUUAGAUAAUUAGUAG- 5'	26									N646_2091 18 5' AGUAAAGUCUAUUCAGC 3' 34
			||:|||||||| ||:||
	N646_3113	75	5' UGCUAAUCUAUU--UCGUCG 3'	92									Energy: -10.67
													p-value: 0.017
Energy:			-9.81										543943989 gene product: NAD(P)H-flavin reductase
p-value:		0.026
543973245 gene product:	hypothetical protein												%%%%%%%%%%%%%%%%%%%%%%%%%%%%%%%%%%%%%%%%%%%%%%%%%%%%%%%%%%%%%%%%%%%%%%%%%%%%%%%%
													N646_0855 15
%%%%%%%%%%%%%%%%%%%%%%%%%%%%%%%%%%%%%%%%%%%%%%%%%%%%%%%%%%%%%%%%%%%%%%%%%%%%%%%%													misc_RNA_3465 46 3' ACUCGGUUAGAUAA 5' 33
N646_4055 16													||||||||||||
	misc_RNA_3465	29	3' GUAGUCUUUCCUG-UUUUCC 5'	11									N646_0855 -131 5' AGAGCCAAUCUAUG 3' -118
			||:| ||||||| :||||
	N646_4055	-22	5' AAUUAAAAAGGACUGAAAGA 3'	-3									Energy: -10.61
													p-value: 0.017
Energy:			-9.8										543942769 gene product: hypothetical protein
p-value:		0.026
543974186 gene product:	enoyl-CoA hydratase												%%%%%%%%%%%%%%%%%%%%%%%%%%%%%%%%%%%%%%%%%%%%%%%%%%%%%%%%%%%%%%%%%%%%%%%%%%%%%%%%
													N646_0666 16
%%%%%%%%%%%%%%%%%%%%%%%%%%%%%%%%%%%%%%%%%%%%%%%%%%%%%%%%%%%%%%%%%%%%%%%%%%%%%%%%													misc_RNA_3465 54 3' AUUG-UU--AUACUCGGU 5' 40
N646_4327 17													|||| |: ||||||||
	misc_RNA_3465	45	3' CUCGGUUAGAU 5'	35									N646_0666 83 5' UAACGAGUUUAUGAGCC- 3' 100
			|||||||||
	N646_4327	-149	5' UAGCCAAUCUU 3'	-139									Energy: -10.4
													p-value: 0.019
Energy:			-9.74										543942580 gene product: agglutination protein
p-value:		0.026
543974458 gene product:	anaerobic ribonucleoside-triphosphate reductase												%%%%%%%%%%%%%%%%%%%%%%%%%%%%%%%%%%%%%%%%%%%%%%%%%%%%%%%%%%%%%%%%%%%%%%%%%%%%%%%%
													N646_1720 17
%%%%%%%%%%%%%%%%%%%%%%%%%%%%%%%%%%%%%%%%%%%%%%%%%%%%%%%%%%%%%%%%%%%%%%%%%%%%%%%%													misc_RNA_3465 46 3' ACUCGGUUAGA 5' 36
N646_4328 18													|||||||||
	misc_RNA_3465	45	3' CUCGGUUAGAU 5'	35									N646_1720 -171 5' AGAGCCAAUCA 3' -161
			|||||||||
	N646_4328	57	5' UAGCCAAUCUU 3'	67									Energy: -10.27
													p-value: 0.020
Energy:			-9.59										543943634 gene product: hypothetical protein
p-value:		0.028
543974459 gene product:	hypothetical protein												%%%%%%%%%%%%%%%%%%%%%%%%%%%%%%%%%%%%%%%%%%%%%%%%%%%%%%%%%%%%%%%%%%%%%%%%%%%%%%%%
													N646_2480 18
%%%%%%%%%%%%%%%%%%%%%%%%%%%%%%%%%%%%%%%%%%%%%%%%%%%%%%%%%%%%%%%%%%%%%%%%%%%%%%%%													misc_RNA_3465 26 3' GUCUUUCCUGUUU 5' 14
N646_4021 19													|||||||||||
	misc_RNA_3465	46	3' ACUCGGUUAGA 5'	36									N646_2480 -178 5' GAGAAAGGACAAU 3' -166
			| |||||||
	N646_4021	12	5' AGUGCCAAUCA 3'	22									Energy: -10.17
													p-value: 0.021
Energy:			-9.57										543944373 gene product: hypothetical protein
p-value:		0.029
543974152 gene product:	electron transfer flavoprotein, beta-subunit												%%%%%%%%%%%%%%%%%%%%%%%%%%%%%%%%%%%%%%%%%%%%%%%%%%%%%%%%%%%%%%%%%%%%%%%%%%%%%%%%
													N646_1350 19
%%%%%%%%%%%%%%%%%%%%%%%%%%%%%%%%%%%%%%%%%%%%%%%%%%%%%%%%%%%%%%%%%%%%%%%%%%%%%%%%													misc_RNA_3465 52 3' GUUAU-ACUCGGUUAGA 5' 36
N646_4470 20													||||| |||||||||:
	misc_RNA_3465	48	3' AUACUCGGUUA 5'	38									N646_1350 18 5' CAAUAUUGAGCCAAUUC 3' 34
			|||||||||
	N646_4470	-125	5' GAUGAGCCAAA 3'	-115									Energy: -9.58
													p-value: 0.029
Energy:			-9.5										543943264 gene product: hypothetical protein
p-value:		0.03
543974601 gene product:	hypothetical protein												%%%%%%%%%%%%%%%%%%%%%%%%%%%%%%%%%%%%%%%%%%%%%%%%%%%%%%%%%%%%%%%%%%%%%%%%%%%%%%%%
													N646_2122 20
%%%%%%%%%%%%%%%%%%%%%%%%%%%%%%%%%%%%%%%%%%%%%%%%%%%%%%%%%%%%%%%%%%%%%%%%%%%%%%%%													misc_RNA_3465 78 3' GCGCUUCAGAUAAGUCUU 5' 61
N646_3159 21													|| ||||||| :||||
	misc_RNA_3465	54	3' AUUGUUAUACUCGGUU 5'	39									N646_2122 79 5' AGCAAAGUCUACGUAGAA 3' 96
			||| |||||||:||
	N646_3159	-80	5' AAACUAUAUGAGUCAC 3'	-65									Energy: -9.52
													p-value: 0.029
Energy:			-9.35										543944020 gene product: thiamine biosynthesis protein ThiC
p-value:		0.032
543973291 gene product:	iron(III) ABC transporter, periplasmic iron-compound-binding protein												%%%%%%%%%%%%%%%%%%%%%%%%%%%%%%%%%%%%%%%%%%%%%%%%%%%%%%%%%%%%%%%%%%%%%%%%%%%%%%%%
													N646_1033 21
%%%%%%%%%%%%%%%%%%%%%%%%%%%%%%%%%%%%%%%%%%%%%%%%%%%%%%%%%%%%%%%%%%%%%%%%%%%%%%%%													misc_RNA_3465 27 3' AGUCUU-UCCUGUUUU 5' 13
N646_4433 22													||||| ||||||||
	misc_RNA_3465	56	3' ACAUUGUUAUACUCGG 5'	41									N646_1033 -191 5' GCAGAAUAGGACAAAU 3' -176
			| :: |||||||||
	N646_4433	-9	5' CGAGGGAAUAUGAGCA 3'	7									Energy: -9.36
													p-value: 0.032
Energy:			-9.28										543942947 gene product: pseudouridine synthase family 1 protein
p-value:		0.033
543974564 gene product:	hypothetical protein												%%%%%%%%%%%%%%%%%%%%%%%%%%%%%%%%%%%%%%%%%%%%%%%%%%%%%%%%%%%%%%%%%%%%%%%%%%%%%%%%
													N646_2264 22
%%%%%%%%%%%%%%%%%%%%%%%%%%%%%%%%%%%%%%%%%%%%%%%%%%%%%%%%%%%%%%%%%%%%%%%%%%%%%%%%													misc_RNA_3465 55 3' CAUUGUUAUACUCGGUU 5' 39
N646_4248 23													||:|||||||||::|
	misc_RNA_3465	51	3' GUUAUACUCGGUUAGA 5'	36									N646_2264 -8 5' AUAGCAAUAUGAGUUAC 3' 9
			|||| ||||||||||
	N646_4248	36	5' CAAU-UGAGCCAAUCG 3'	51									Energy: -9.31
													p-value: 0.032
Energy:			-9.24										543944157 gene product: universal stress protein A
p-value:		0.033
543974379 gene product:	hypothetical protein												%%%%%%%%%%%%%%%%%%%%%%%%%%%%%%%%%%%%%%%%%%%%%%%%%%%%%%%%%%%%%%%%%%%%%%%%%%%%%%%%
													N646_3052 23
%%%%%%%%%%%%%%%%%%%%%%%%%%%%%%%%%%%%%%%%%%%%%%%%%%%%%%%%%%%%%%%%%%%%%%%%%%%%%%%%													misc_RNA_3465 69 3' AUAAGUCUUACUUA 5' 56
N646_3571 24													||||||||||||
	misc_RNA_3465	48	3' AUACUCGGUUA 5'	38									N646_3052 -8 5' AAUUCAGAAUGAAA 3' 6
			|||||||||
	N646_3571	-1	5' AAUGAGCCAAG 3'	10									Energy: -9.26
													p-value: 0.033
Energy:			-9.2										543944943 gene product: putative oxidoreductase protein
p-value:		0.034
543973703 gene product:	hypothetical protein												%%%%%%%%%%%%%%%%%%%%%%%%%%%%%%%%%%%%%%%%%%%%%%%%%%%%%%%%%%%%%%%%%%%%%%%%%%%%%%%%
													N646_1512 24
%%%%%%%%%%%%%%%%%%%%%%%%%%%%%%%%%%%%%%%%%%%%%%%%%%%%%%%%%%%%%%%%%%%%%%%%%%%%%%%%													misc_RNA_3465 52 3' UGUUAUACUCGGU 5' 40
N646_4544 25													|||||||||||:
	misc_RNA_3465	27	3' AGUCUUUCCUGUUU 5'	14									N646_1512 -183 5' CCAAUAUGAGCCG 3' -171
			||||||||||||
	N646_4544	-92	5' CCAGAAAGGACAAU 3'	-79									Energy: -9.22
													p-value: 0.034
Energy:			-9.07										543943426 gene product: putative LysR-like regular protein
p-value:		0.036
543974675 gene product:	hypothetical protein												%%%%%%%%%%%%%%%%%%%%%%%%%%%%%%%%%%%%%%%%%%%%%%%%%%%%%%%%%%%%%%%%%%%%%%%%%%%%%%%%
													N646_1323 25
%%%%%%%%%%%%%%%%%%%%%%%%%%%%%%%%%%%%%%%%%%%%%%%%%%%%%%%%%%%%%%%%%%%%%%%%%%%%%%%%													misc_RNA_3465 33 3' AUUAGUAGUC-UUUCC 5' 19
N646_3634 26													||||||||| ||||
	misc_RNA_3465	29	3' GUAGUCUUUCCUGUUU 5'	14									N646_1323 -76 5' AAAUCAUCAGUAAAGA 3' -61
			|||||||||| :||
	N646_3634	-48	5' AAUCAGAAAGG-UAAC 3'	-34									Energy: -9.15
													p-value: 0.035
Energy:			-9.03										543943237 gene product: heme exporter protein D
p-value:		0.037
543973765 gene product:	hypothetical protein												%%%%%%%%%%%%%%%%%%%%%%%%%%%%%%%%%%%%%%%%%%%%%%%%%%%%%%%%%%%%%%%%%%%%%%%%%%%%%%%%
													N646_0145 26
%%%%%%%%%%%%%%%%%%%%%%%%%%%%%%%%%%%%%%%%%%%%%%%%%%%%%%%%%%%%%%%%%%%%%%%%%%%%%%%%													misc_RNA_3465 42 3' GGUUAGAUAAUUAGUA 5' 27
N646_3138 27													|:||||||||||:|
	misc_RNA_3465	20	3' CCUGUUUUCCAA 5'	9									N646_0145 -28 5' GCGAUCUAUUAAUUAC 3' -13
			||||||||||
	N646_3138	86	5' UGACAAAAGGUA 3'	97									Energy: -9.14
													p-value: 0.035
Energy:			-8.86										543942059 gene product: tryptophanyl-tRNA synthetase
p-value:		0.04
543973270 gene product:	hypothetical protein												%%%%%%%%%%%%%%%%%%%%%%%%%%%%%%%%%%%%%%%%%%%%%%%%%%%%%%%%%%%%%%%%%%%%%%%%%%%%%%%%
													N646_0589 27
%%%%%%%%%%%%%%%%%%%%%%%%%%%%%%%%%%%%%%%%%%%%%%%%%%%%%%%%%%%%%%%%%%%%%%%%%%%%%%%%													misc_RNA_3465 103 3' UUUC-GCUCAAAGGACU 5' 88
N646_4230 28													|||| :||||||||||
	misc_RNA_3465	67	3' AAGUCUUACUUACAUUGUUA 5'	48									N646_0589 -46 5' AAAGUUGAGUUUCCUGC 3' -30
			||| :||||||| |||||
	N646_4230	-6	5' AUCAAGAUGAAUG-AACAAC 3'	13									Energy: -9.12
													p-value: 0.035
Energy:			-8.79										543942503 gene product: cation transport ATPase, E1-E2 family protein
p-value:		0.041
543974361 gene product:	hypothetical protein												%%%%%%%%%%%%%%%%%%%%%%%%%%%%%%%%%%%%%%%%%%%%%%%%%%%%%%%%%%%%%%%%%%%%%%%%%%%%%%%%
													N646_0194 28
%%%%%%%%%%%%%%%%%%%%%%%%%%%%%%%%%%%%%%%%%%%%%%%%%%%%%%%%%%%%%%%%%%%%%%%%%%%%%%%%													misc_RNA_3465 15 3' UUUCCAACAGAU-AAG 5' 1
N646_4179 29													:|||||||:|: ||:
	misc_RNA_3465	71	3' AGAUAAGUCUUAC 5'	59									N646_0194 -45 5' UGAGGUUGUUUGUUUU 3' -30
			|||||||||||
	N646_4179	17	5' ACUAUUCAGAAUC 3'	29									Energy: -9.11
													p-value: 0.036
Energy:			-8.66										543942108 gene product: hypothetical protein
p-value:		0.043
543974310 gene product:	hypothetical protein												%%%%%%%%%%%%%%%%%%%%%%%%%%%%%%%%%%%%%%%%%%%%%%%%%%%%%%%%%%%%%%%%%%%%%%%%%%%%%%%%
													N646_0503 29
%%%%%%%%%%%%%%%%%%%%%%%%%%%%%%%%%%%%%%%%%%%%%%%%%%%%%%%%%%%%%%%%%%%%%%%%%%%%%%%%													misc_RNA_3465 54 3' UUG-UUAUACUCGGUUA-GAUA 5' 34
N646_3167 30													||| ||||||||||||| ||:
	misc_RNA_3465	78	3' GCGCUUCAGAUA 5'	67									N646_0503 -56 5' AACAAAUAUGAGCCAAUACUG- 3' -36
			|||||||:||
	N646_3167	-42	5' GGCGAAGUUUAA 3'	-31									Energy: -9.1
													p-value: 0.036
Energy:			-8.61										543942417 gene product: hypothetical protein
p-value:		0.044
543973299 gene product:	hypothetical protein												%%%%%%%%%%%%%%%%%%%%%%%%%%%%%%%%%%%%%%%%%%%%%%%%%%%%%%%%%%%%%%%%%%%%%%%%%%%%%%%%
													N646_1565 30
%%%%%%%%%%%%%%%%%%%%%%%%%%%%%%%%%%%%%%%%%%%%%%%%%%%%%%%%%%%%%%%%%%%%%%%%%%%%%%%%													misc_RNA_3465 73 3' UCAGAUAAGUCUUACUUACA 5' 54
N646_3232 31													|||||||||||||| |||
	misc_RNA_3465	76	3' GCUUCAGAUAAGUCUU 5'	61									N646_1565 -16 5' UGUCUAUUCAGAAUGUAUG- 3' 3
			|:| ||||||||||
	N646_3232	11	5' AGGAAUCUAUUCAGAC 3'	26									Energy: -9.06
													p-value: 0.036
Energy:			-8.43										543943479 gene product: hypothetical protein
p-value:		0.047
543973364 gene product:	ScrA (aminotransferase)												%%%%%%%%%%%%%%%%%%%%%%%%%%%%%%%%%%%%%%%%%%%%%%%%%%%%%%%%%%%%%%%%%%%%%%%%%%%%%%%%
													N646_0714 31
%%%%%%%%%%%%%%%%%%%%%%%%%%%%%%%%%%%%%%%%%%%%%%%%%%%%%%%%%%%%%%%%%%%%%%%%%%%%%%%%													misc_RNA_3465 57 3' UACA-UUGUUAUACUCGGU 5' 40
N646_3472 32													||| :||||||||||::
	misc_RNA_3465	45	3' CUCGGUUAGAUA 5'	34									N646_0714 -195 5' UUGUCGACAAUAUGAGUUC 3' -177
			||||||||||
	N646_3472	-96	5' AAGCCAAUCUAA 3'	-85									Energy: -9.02
													p-value: 0.037
Energy:			-8.31										543942628 gene product: transcriptional regulator, GntR family protein
p-value:		0.05
543973604 gene product:	putative two-component sensor												%%%%%%%%%%%%%%%%%%%%%%%%%%%%%%%%%%%%%%%%%%%%%%%%%%%%%%%%%%%%%%%%%%%%%%%%%%%%%%%%
													N646_1091 32
													misc_RNA_3465 78 3' GCGCUUCAGA 5' 69
													||||||||
													N646_1091 -161 5' AGCGAAGUCC 3' -152
													Energy: -8.94
													p-value: 0.038
													543943005 gene product: putative tetrathionate reductase complex, subunit C
													%%%%%%%%%%%%%%%%%%%%%%%%%%%%%%%%%%%%%%%%%%%%%%%%%%%%%%%%%%%%%%%%%%%%%%%%%%%%%%%%
													N646_0440 33
													misc_RNA_3465 54 3' AUUGUUAU-ACUCGGU 5' 40
													||||||| ||||||
													N646_0440 -120 5' CAACAAUAUUGAGCC- 3' -106
													Energy: -8.89
													p-value: 0.039
													543942354 gene product: DNA polymerase III subunit epsilon
													%%%%%%%%%%%%%%%%%%%%%%%%%%%%%%%%%%%%%%%%%%%%%%%%%%%%%%%%%%%%%%%%%%%%%%%%%%%%%%%%
													N646_0557 34
													misc_RNA_3465 31 3' UAGUAGUCUUUCC-UGUU 5' 15
													|||||::|||||| |||
													N646_0557 -24 5' AUCAUUGGAAAGGAACAC 3' -7
													Energy: -8.63
													p-value: 0.044
													543942471 gene product: hypothetical protein
													%%%%%%%%%%%%%%%%%%%%%%%%%%%%%%%%%%%%%%%%%%%%%%%%%%%%%%%%%%%%%%%%%%%%%%%%%%%%%%%%
													N646_2669 35
													misc_RNA_3465 30 3' AGUAGUC-UUUCCUGU 5' 16
													|| ||| |||||||:
													N646_2669 80 5' ACA-CAGAAAAGGACG 3' 94
													Energy: -8.62
													p-value: 0.044
													543944562 gene product: oxidoreductase Tas, aldo/keto reductase family protein
													%%%%%%%%%%%%%%%%%%%%%%%%%%%%%%%%%%%%%%%%%%%%%%%%%%%%%%%%%%%%%%%%%%%%%%%%%%%%%%%%
													N646_2882 36
													misc_RNA_3465 45 3' CUCGGUUAGAUAA 5' 33
													|||||||||:|
													N646_2882 -61 5' UAGCCAAUCUGUA 3' -49
													Energy: -8.61
													p-value: 0.044
													543944773 gene product: hypothetical protein
													%%%%%%%%%%%%%%%%%%%%%%%%%%%%%%%%%%%%%%%%%%%%%%%%%%%%%%%%%%%%%%%%%%%%%%%%%%%%%%%%
													N646_1035 37
													misc_RNA_3465 48 3' AUACUCGGUUAGAU 5' 35
													||||||||:|:|
													N646_1035 -1 5' AAUGAGCCAGUUUU 3' 13
													Energy: -8.59
													p-value: 0.044
													543942949 gene product: putative translation factor
													%%%%%%%%%%%%%%%%%%%%%%%%%%%%%%%%%%%%%%%%%%%%%%%%%%%%%%%%%%%%%%%%%%%%%%%%%%%%%%%%
													N646_0734 38
													misc_RNA_3465 27 3' AGUCUUUCCUGUUUU 5' 13
													|:||||||||:||
													N646_0734 -16 5' CCGGAAAGGACGAAU 3' -2
													Energy: -8.56
													p-value: 0.045
													543942648 gene product: hypothetical protein
													%%%%%%%%%%%%%%%%%%%%%%%%%%%%%%%%%%%%%%%%%%%%%%%%%%%%%%%%%%%%%%%%%%%%%%%%%%%%%%%%
													N646_1379 39
													misc_RNA_3465 26 3' GUCUUUCCUGUUUUC 5' 12
													|||||||||||:|
													N646_1379 -23 5' AAGAAAGGACAAGAA 3' -9
													Energy: -8.51
													p-value: 0.046
													543943293 gene product: putative glycine cleavage system transcriptional repressor
													%%%%%%%%%%%%%%%%%%%%%%%%%%%%%%%%%%%%%%%%%%%%%%%%%%%%%%%%%%%%%%%%%%%%%%%%%%%%%%%%
													N646_2415 40
													misc_RNA_3465 54 3' AUUGUUAUACUCGG 5' 41
													:|||:|||||||
													N646_2415 -7 5' AGACAGUAUGAGCG 3' 7
													Energy: -8.33
													p-value: 0.049
													543944308 gene product: hypothetical protein

## Sheet: targetRNA2 01
****************************************														****************************************
PROGRAM PARAMETERS														PROGRAM PARAMETERS
TargetRNA version: 2.01														TargetRNA version: 2.01
Replicon: Vibrio alginolyticus NBRC 15630 = ATCC 17749 chromosome 1														Replicon: Vibrio alginolyticus NBRC 15630 = ATCC 17749 chromosome 2
NTs before start codon: 80														NTs before start codon: 80
NTs after start codon: 20														NTs after start codon: 20
Seed length: 7														Seed length: 7
sRNA conservation and accessibility: true														sRNA conservation and accessibility: true
sRNA window size: 13														sRNA window size: 13
mRNA structural accessibility: true														mRNA structural accessibility: true
Interaction region: 20														Interaction region: 20
Filter size: 400														Filter size: 400
Single target: -														Single target: -
File of candidate targets: -														File of candidate targets: -
p-value: 0.05														p-value: 0.05
****************************************														****************************************
Rank Gene Synonym Energy Pvalue sRNA_start sRNA_stop mRNA_start mRNA_stop														Rank Gene Synonym Energy Pvalue sRNA_start sRNA_stop mRNA_start mRNA_stop
1 - N646_1196 -17.06 0.000 38 53 -6 10														1 - N646_3571 -11.5 0.010 38 48 -1 10
2 - N646_1323 -12.55 0.005 19 33 -76 -61														2 - N646_4686 -11.26 0.012 12 30 -20 -1
3 - N646_1334 -12.36 0.006 57 74 -13 5														3 - N646_4433 -10.4 0.019 41 56 -9 7
4 - N646_1035 -11.77 0.009 35 48 -1 13														4 - N646_3131 -10.27 0.020 36 51 -71 -56
5 - N646_2264 -11.63 0.009 39 55 -8 9														5 - N646_3987 -10.2 0.021 95 107 -78 -66
6 - N646_2851 -11.21 0.012 1 10 1 11														6 - N646_3948 -10.01 0.023 34 43 10 19
7 - N646_3052 -10.96 0.014 56 69 -8 6														7 - N646_3159 -9.9 0.024 39 54 -80 -65
8 - N646_2821 -10.85 0.015 24 38 -16 -2														8 - N646_4230 -9.59 0.028 48 67 -6 13
9 - N646_1346 -10.83 0.015 30 43 4 17														9 - N646_3522 -9.54 0.029 21 33 4 16
10 - N646_2762 -10.69 0.016 17 27 -16 -6														10 - N646_4707 -9.41 0.031 95 104 9 18
11 - N646_0437 -10.69 0.016 17 29 -73 -61														11 - N646_4031 -9.37 0.032 10 20 -80 -70
12 - N646_0615 -10.43 0.019 94 107 -79 -66														12 - N646_3167 -9.35 0.032 67 78 -42 -31
13 - N646_1009 -10.42 0.019 41 59 -12 7														13 - N646_4365 -9.19 0.034 41 55 -45 -32
14 - N646_1090 -10.4 0.019 40 53 -76 -63														14 - N646_4510 -9.05 0.036 17 29 -19 -7
15 - N646_0166 -10.29 0.020 36 44 -69 -61														15 - N646_4479 -9.02 0.037 17 27 -19 -9
16 - N646_0503 -10.28 0.020 34 54 -56 -36														16 - N646_3398 -8.92 0.038 23 34 10 20
17 - N646_1414 -10.2 0.021 66 78 -12 3														17 - N646_3747 -8.92 0.039 17 30 -22 -7
18 - N646_0145 -10.11 0.022 27 42 -28 -13														18 - N646_3109 -8.83 0.040 72 84 -69 -57
19 - N646_2655 -9.52 0.029 12 26 -20 -6														19 - N646_3784 -8.79 0.041 20 36 5 20
20 - N646_0427 -9.37 0.032 11 25 -29 -15														20 - N646_3210 -8.72 0.042 36 51 -4 12
21 - N646_1652 -9.34 0.032 12 26 -15 -1														21 - N646_3181 -8.67 0.043 47 59 -72 -60
22 - N646_2885 -8.94 0.038 69 79 -67 -57														22 - N646_3780 -8.65 0.043 70 78 -12 -4
23 - N646_2431 -8.85 0.040 33 45 -39 -27														23 - N646_3584 -8.63 0.044 15 31 -15 2
24 - N646_0571 -8.62 0.044 13 26 -26 -12														24 - N646_3482 -8.55 0.045 11 23 -14 -1
25 - N646_2802 -8.56 0.045 15 29 -19 -4														25 - N646_3295 -8.55 0.045 60 72 -80 -69
26 - N646_3067 -8.45 0.047 39 55 -8 9														26 - N646_3634 -8.52 0.046 14 29 -48 -34
27 - N646_1448 -8.32 0.049 39 48 -16 -7
28 - N646_0266 -8.3 0.050 35 54 -5 13														%%%%%%%%%%%%%%%%%%%%%%%%%%%%%%%%%%%%%%%%%%%%%%%%%%%%%%%%%%%%%%%%%%%%%%%%%%%%%%%%
														N646_3571 1
%%%%%%%%%%%%%%%%%%%%%%%%%%%%%%%%%%%%%%%%%%%%%%%%%%%%%%%%%%%%%%%%%%%%%%%%%%%%%%%%														misc-RNA_3465 48 3' AUACUCGGUUA 5' 38
N646_1196 1														|||||||||
misc_RNA_3465 53 3' UUGUUAUACUCGGUUA 5' 38														N646_3571 -1 5' AAUGAGCCAAG 3' 10
|||:||||||||||
N646_1196 -6 5' UACAGUAUGAGCCAAA 3' 10														Energy: -11.5
														p-value: 0.010
Energy: -17.06														543973703 gene product: hypothetical protein
p-value: 0.000
543943110 gene product: hypothetical protein														%%%%%%%%%%%%%%%%%%%%%%%%%%%%%%%%%%%%%%%%%%%%%%%%%%%%%%%%%%%%%%%%%%%%%%%%%%%%%%%%
														N646_4686 2
%%%%%%%%%%%%%%%%%%%%%%%%%%%%%%%%%%%%%%%%%%%%%%%%%%%%%%%%%%%%%%%%%%%%%%%%%%%%%%%%														misc-RNA_3465 30 3' AGUAGUCUUUCCUG-UUUUC 5' 12
N646_1323 2														|||| ||||||| ||||
misc_RNA_3465 33 3' AUUAGUAGUC-UUUCC 5' 19														N646_4686 -20 5' ACAUCUCAAAGGACUAAAAA 3' -1
||||||||| ||||
N646_1323 -76 5' AAAUCAUCAGUAAAGA 3' -61														Energy: -11.26
														p-value: 0.012
Energy: -12.55														543974817 gene product: hypothetical protein
p-value: 0.005
543943237 gene product: heme exporter protein D														%%%%%%%%%%%%%%%%%%%%%%%%%%%%%%%%%%%%%%%%%%%%%%%%%%%%%%%%%%%%%%%%%%%%%%%%%%%%%%%%
														N646_4433 3
%%%%%%%%%%%%%%%%%%%%%%%%%%%%%%%%%%%%%%%%%%%%%%%%%%%%%%%%%%%%%%%%%%%%%%%%%%%%%%%%														misc-RNA_3465 56 3' ACAUUGUUAUACUCGG 5' 41
N646_1334 3														| :: |||||||||
misc_RNA_3465 74 3' UUCAGAUAAGUCUUACUU 5' 57														N646_4433 -9 5' CGAGGGAAUAUGAGCA 3' 7
::|||||||||||||||
N646_1334 -13 5' GGGUCUAUUCAGAAUGAU 3' 5														Energy: -10.4
														p-value: 0.019
Energy: -12.36														543974564 gene product: hypothetical protein
p-value: 0.006
543943248 gene product: chemotaxis protein CheZ														%%%%%%%%%%%%%%%%%%%%%%%%%%%%%%%%%%%%%%%%%%%%%%%%%%%%%%%%%%%%%%%%%%%%%%%%%%%%%%%%
														N646_3131 4
%%%%%%%%%%%%%%%%%%%%%%%%%%%%%%%%%%%%%%%%%%%%%%%%%%%%%%%%%%%%%%%%%%%%%%%%%%%%%%%%														misc-RNA_3465 51 3' GUUAUACUCGGUUAGA 5' 36
N646_1035 4														|:|||||||::||:
misc_RNA_3465 48 3' AUACUCGGUUAGAU 5' 35														N646_3131 -71 5' GAGUAUGAGCUGAUUA 3' -56
||||||||:|:|
N646_1035 -1 5' AAUGAGCCAGUUUU 3' 13														Energy: -10.27
														p-value: 0.020
Energy: -11.77														543973263 gene product: putative transcriptional regulator
p-value: 0.009
543942949 gene product: putative translation factor														%%%%%%%%%%%%%%%%%%%%%%%%%%%%%%%%%%%%%%%%%%%%%%%%%%%%%%%%%%%%%%%%%%%%%%%%%%%%%%%%
														N646_3987 5
%%%%%%%%%%%%%%%%%%%%%%%%%%%%%%%%%%%%%%%%%%%%%%%%%%%%%%%%%%%%%%%%%%%%%%%%%%%%%%%%														misc-RNA_3465 107 3' UUUUUUUCGCUCA 5' 95
N646_2264 5														:||:|||||||
misc_RNA_3465 55 3' CAUUGUUAUACUCGGUU 5' 39														N646_3987 -78 5' UGAAGAAGCGAGA 3' -66
||:|||||||||::|
N646_2264 -8 5' AUAGCAAUAUGAGUUAC 3' 9														Energy: -10.2
														p-value: 0.021
Energy: -11.63														543974118 gene product: hypothetical protein
p-value: 0.009
543944157 gene product: universal stress protein A														%%%%%%%%%%%%%%%%%%%%%%%%%%%%%%%%%%%%%%%%%%%%%%%%%%%%%%%%%%%%%%%%%%%%%%%%%%%%%%%%
														N646_3948 6
%%%%%%%%%%%%%%%%%%%%%%%%%%%%%%%%%%%%%%%%%%%%%%%%%%%%%%%%%%%%%%%%%%%%%%%%%%%%%%%%														misc-RNA_3465 43 3' CGGUUAGAUA 5' 34
N646_2851 6														||||||||
misc_RNA_3465 10 3' AACAGAUAAG- 5' 1														N646_3948 10 5' UCCAAUCUAA 3' 19
|||||||||
N646_2851 1 5' AUGUCUAUUCA 3' 11														Energy: -10.01
														p-value: 0.023
Energy: -11.21														543974079 gene product: hypothetical protein
p-value: 0.012
543944742 gene product: exonuclease IX														%%%%%%%%%%%%%%%%%%%%%%%%%%%%%%%%%%%%%%%%%%%%%%%%%%%%%%%%%%%%%%%%%%%%%%%%%%%%%%%%
														N646_3159 7
%%%%%%%%%%%%%%%%%%%%%%%%%%%%%%%%%%%%%%%%%%%%%%%%%%%%%%%%%%%%%%%%%%%%%%%%%%%%%%%%														misc-RNA_3465 54 3' AUUGUUAUACUCGGUU 5' 39
N646_3052 7														||| |||||||:||
misc_RNA_3465 69 3' AUAAGUCUUACUUA 5' 56														N646_3159 -80 5' AAACUAUAUGAGUCAC 3' -65
||||||||||||
N646_3052 -8 5' AAUUCAGAAUGAAA 3' 6														Energy: -9.9
														p-value: 0.024
Energy: -10.96														543973291 gene product: iron(III) ABC transporter, periplasmic iron-compound-binding protein
p-value: 0.014
543944943 gene product: putative oxidoreductase protein														%%%%%%%%%%%%%%%%%%%%%%%%%%%%%%%%%%%%%%%%%%%%%%%%%%%%%%%%%%%%%%%%%%%%%%%%%%%%%%%%
														N646_4230 8
%%%%%%%%%%%%%%%%%%%%%%%%%%%%%%%%%%%%%%%%%%%%%%%%%%%%%%%%%%%%%%%%%%%%%%%%%%%%%%%%														misc-RNA_3465 67 3' AAGUCUUACUUACAUUGUUA 5' 48
N646_2821 8														||| :||||||| |||||
misc_RNA_3465 38 3' AGAUAAUUAGUAGUC 5' 24														N646_4230 -6 5' AUCAAGAUGAAUG-AACAAC 3' 13
|||| ||||||||
N646_2821 -16 5' ACUAUAAAUCAUCAA 3' -2														Energy: -9.59
														p-value: 0.028
Energy: -10.85														543974361 gene product: hypothetical protein
p-value: 0.015
543944712 gene product: hypothetical protein														%%%%%%%%%%%%%%%%%%%%%%%%%%%%%%%%%%%%%%%%%%%%%%%%%%%%%%%%%%%%%%%%%%%%%%%%%%%%%%%%
														N646_3522 9
%%%%%%%%%%%%%%%%%%%%%%%%%%%%%%%%%%%%%%%%%%%%%%%%%%%%%%%%%%%%%%%%%%%%%%%%%%%%%%%%														misc-RNA_3465 33 3' AUUAGUAGUCUUU 5' 21
N646_1346 9														|:|:|||||||
misc_RNA_3465 43 3' CGGUUAGAUAAUUA 5' 30														N646_3522 4 5' AAGUUAUCAGAAC 3' 16
||:|||||||||
N646_1346 4 5' ACCGAUCUAUUAAG 3' 17														Energy: -9.54
														p-value: 0.029
Energy: -10.83														543973654 gene product: GGDEF family protein
p-value: 0.015
543943260 gene product: flagellar motor switch protein M														%%%%%%%%%%%%%%%%%%%%%%%%%%%%%%%%%%%%%%%%%%%%%%%%%%%%%%%%%%%%%%%%%%%%%%%%%%%%%%%%
														N646_4707 10
%%%%%%%%%%%%%%%%%%%%%%%%%%%%%%%%%%%%%%%%%%%%%%%%%%%%%%%%%%%%%%%%%%%%%%%%%%%%%%%%														misc-RNA_3465 104 3' UUUUCGCUCA 5' 95
N646_2762 10														:|||||||
misc_RNA_3465 27 3' AGUCUUUCCUG 5' 17														N646_4707 9 5' UGAAGCGAGA 3' 18
|||||||||
N646_2762 -16 5' ACAGAAAGGAA 3' -6														Energy: -9.41
														p-value: 0.031
Energy: -10.69														543974838 gene product: hypothetical protein
p-value: 0.016
543944653 gene product: nucleoside diphosphate kinase														%%%%%%%%%%%%%%%%%%%%%%%%%%%%%%%%%%%%%%%%%%%%%%%%%%%%%%%%%%%%%%%%%%%%%%%%%%%%%%%%
														N646_4031 11
%%%%%%%%%%%%%%%%%%%%%%%%%%%%%%%%%%%%%%%%%%%%%%%%%%%%%%%%%%%%%%%%%%%%%%%%%%%%%%%%														misc-RNA_3465 20 3' CCUGUUUUCCA 5' 10
N646_0437 11														|||||||||
misc_RNA_3465 29 3' GUAGUCUUUCCUG 5' 17														N646_4031 -80 5' AGACAAAAGGC 3' -70
|| ||||||||
N646_0437 -73 5' GAUGAGAAAGGAA 3' -61														Energy: -9.37
														p-value: 0.032
Energy: -10.69														543974162 gene product: hypothetical protein
p-value: 0.016
543942351 gene product: glycine betaine/L-proline transport system permease														%%%%%%%%%%%%%%%%%%%%%%%%%%%%%%%%%%%%%%%%%%%%%%%%%%%%%%%%%%%%%%%%%%%%%%%%%%%%%%%%
														N646_3167 12
%%%%%%%%%%%%%%%%%%%%%%%%%%%%%%%%%%%%%%%%%%%%%%%%%%%%%%%%%%%%%%%%%%%%%%%%%%%%%%%%														misc-RNA_3465 78 3' GCGCUUCAGAUA 5' 67
N646_0615 12														|||||||:||
misc_RNA_3465 107 3' UUUUUUUCGCUCAA 5' 94														N646_3167 -42 5' GGCGAAGUUUAA 3' -31
:|||||||||||
N646_0615 -79 5' UGAAAAAGCGAGUC 3' -66														Energy: -9.35
														p-value: 0.032
Energy: -10.43														543973299 gene product: hypothetical protein
p-value: 0.019
543942529 gene product: hypothetical protein														%%%%%%%%%%%%%%%%%%%%%%%%%%%%%%%%%%%%%%%%%%%%%%%%%%%%%%%%%%%%%%%%%%%%%%%%%%%%%%%%
														N646_4365 13
%%%%%%%%%%%%%%%%%%%%%%%%%%%%%%%%%%%%%%%%%%%%%%%%%%%%%%%%%%%%%%%%%%%%%%%%%%%%%%%%														misc-RNA_3465 55 3' CAUUGUUAUACUCG-G 5' 41
N646_1009 13														|||| | |||||| |
misc_RNA_3465 59 3' CUUACAUUGUUAUACUCGG 5' 41														N646_4365 -45 5' UUAAC-A-AUGAGCUC 3' -32
||| | |||||||||:||
N646_1009 -12 5' GAAAG-AACAAUAUGGGCA 3' 7														Energy: -9.19
														p-value: 0.034
Energy: -10.42														543974496 gene product: hypothetical protein
p-value: 0.019
543942923 gene product: cytochrome c-type protein NrfB precursor														%%%%%%%%%%%%%%%%%%%%%%%%%%%%%%%%%%%%%%%%%%%%%%%%%%%%%%%%%%%%%%%%%%%%%%%%%%%%%%%%
														N646_4510 14
%%%%%%%%%%%%%%%%%%%%%%%%%%%%%%%%%%%%%%%%%%%%%%%%%%%%%%%%%%%%%%%%%%%%%%%%%%%%%%%%														misc-RNA_3465 29 3' GUAGUCUUUCCUG 5' 17
N646_1090 14														|||||||||||
misc_RNA_3465 53 3' UUGUUAUACUCGGU 5' 40														N646_4510 -19 5' AAUCAGAAAGGAG 3' -7
||||||| ||||
N646_1090 -76 5' CACAAUAUAAGCCU 3' -63														Energy: -9.05
														p-value: 0.036
Energy: -10.4														543974641 gene product: methylmalonate-semialdehyde dehydrogenase
p-value: 0.019
543943004 gene product: tetrathionate reductase, subunit B														%%%%%%%%%%%%%%%%%%%%%%%%%%%%%%%%%%%%%%%%%%%%%%%%%%%%%%%%%%%%%%%%%%%%%%%%%%%%%%%%
														N646_4479 15
%%%%%%%%%%%%%%%%%%%%%%%%%%%%%%%%%%%%%%%%%%%%%%%%%%%%%%%%%%%%%%%%%%%%%%%%%%%%%%%%														misc-RNA_3465 27 3' AGUCUUUCCUG 5' 17
N646_0166 15														:||||||||
misc_RNA_3465 44 3' UCGGUUAGA 5' 36														N646_4479 -19 5' AUAGAAAGGAA 3' -9
|||||||
N646_0166 -69 5' UGCCAAUCA 3' -61														Energy: -9.02
														p-value: 0.037
Energy: -10.29														543974610 gene product: electron transfer flavoprotein-ubiquinone oxidoreductase
p-value: 0.020
543942080 gene product: biotin synthesis protein BioC														%%%%%%%%%%%%%%%%%%%%%%%%%%%%%%%%%%%%%%%%%%%%%%%%%%%%%%%%%%%%%%%%%%%%%%%%%%%%%%%%
														N646_3398 16
%%%%%%%%%%%%%%%%%%%%%%%%%%%%%%%%%%%%%%%%%%%%%%%%%%%%%%%%%%%%%%%%%%%%%%%%%%%%%%%%														misc-RNA_3465 34 3' AAUUAGUAGUCU 5' 23
N646_0503 16														|||||||| |:
misc_RNA_3465 54 3' UUG-UUAUACUCGGUUA-GAUA 5' 34														N646_3398 10 5' GUAAUCAUC-GG 3' 20
||| ||||||||||||| ||:
N646_0503 -56 5' AACAAAUAUGAGCCAAUACUG- 3' -36														Energy: -8.92
														p-value: 0.038
Energy: -10.28														543973530 gene product: putative inner membrane or exported protein
p-value: 0.020
543942417 gene product: hypothetical protein														%%%%%%%%%%%%%%%%%%%%%%%%%%%%%%%%%%%%%%%%%%%%%%%%%%%%%%%%%%%%%%%%%%%%%%%%%%%%%%%%
														N646_3747 17
%%%%%%%%%%%%%%%%%%%%%%%%%%%%%%%%%%%%%%%%%%%%%%%%%%%%%%%%%%%%%%%%%%%%%%%%%%%%%%%%														misc-RNA_3465 30 3' AGUAGUC--UUUCCUG 5' 17
N646_1414 17														:||||| ||||||
misc_RNA_3465 78 3' GCGCUUCA--GAUAA 5' 66														N646_3747 -22 5' AUAUCAGAAAAAGGAA 3' -7
||||||| |||
N646_1414 -12 5' AGCGAAGUAGAUAUG 3' 3														Energy: -8.92
														p-value: 0.039
Energy: -10.2														543973878 gene product: putative permease
p-value: 0.021
543943328 gene product: lipid-A-disaccharide synthase														%%%%%%%%%%%%%%%%%%%%%%%%%%%%%%%%%%%%%%%%%%%%%%%%%%%%%%%%%%%%%%%%%%%%%%%%%%%%%%%%
														N646_3109 18
%%%%%%%%%%%%%%%%%%%%%%%%%%%%%%%%%%%%%%%%%%%%%%%%%%%%%%%%%%%%%%%%%%%%%%%%%%%%%%%%														misc-RNA_3465 84 3' CUUUGAGCGCUUC 5' 72
N646_0145 18														:||||||||||
misc_RNA_3465 42 3' GGUUAGAUAAUUAGUA 5' 27														N646_3109 -69 5' AGAACUCGCGAAA 3' -57
|:||||||||||:|
N646_0145 -28 5' GCGAUCUAUUAAUUAC 3' -13														Energy: -8.83
														p-value: 0.040
Energy: -10.11														543973241 gene product: putative ABC transporter
p-value: 0.022
543942059 gene product: tryptophanyl-tRNA synthetase														%%%%%%%%%%%%%%%%%%%%%%%%%%%%%%%%%%%%%%%%%%%%%%%%%%%%%%%%%%%%%%%%%%%%%%%%%%%%%%%%
														N646_3784 19
%%%%%%%%%%%%%%%%%%%%%%%%%%%%%%%%%%%%%%%%%%%%%%%%%%%%%%%%%%%%%%%%%%%%%%%%%%%%%%%%														misc-RNA_3465 36 3' AUAAUUAGUAGUCUUUC 5' 20
N646_2655 19														||||||||||| ||:|
misc_RNA_3465 26 3' GUCUUUCCUGUUUUC- 5' 12														N646_3784 5 5' AAUUAAUCAUCA-AAGG 3' 20
||||||| :|||:|
N646_2655 -20 5' AAGAAAGG-UAAAGGU 3' -6														Energy: -8.79
														p-value: 0.041
Energy: -9.52														543973915 gene product: spermidine/putrescine ABC transporter, periplasmic spermidine/putrescine-binding protein
p-value: 0.029
543944548 gene product: hypothetical protein														%%%%%%%%%%%%%%%%%%%%%%%%%%%%%%%%%%%%%%%%%%%%%%%%%%%%%%%%%%%%%%%%%%%%%%%%%%%%%%%%
														N646_3210 20
%%%%%%%%%%%%%%%%%%%%%%%%%%%%%%%%%%%%%%%%%%%%%%%%%%%%%%%%%%%%%%%%%%%%%%%%%%%%%%%%														misc-RNA_3465 51 3' GUUAUACUC-GGUUAGA 5' 36
N646_0427 20														|||||||| ||||| |
misc_RNA_3465 25 3' UCUUUCCUGUUUUCC 5' 11														N646_3210 -4 5' AAAUAUGAGCCCAAU-U 3' 12
:||||| |||||||
N646_0427 -29 5' GGAAAGAACAAAAGA 3' -15														Energy: -8.72
														p-value: 0.042
Energy: -9.37														543973342 gene product: hypothetical protein
p-value: 0.032
543942341 gene product: thermostable carboxypeptidase 1														%%%%%%%%%%%%%%%%%%%%%%%%%%%%%%%%%%%%%%%%%%%%%%%%%%%%%%%%%%%%%%%%%%%%%%%%%%%%%%%%
														N646_3181 21
%%%%%%%%%%%%%%%%%%%%%%%%%%%%%%%%%%%%%%%%%%%%%%%%%%%%%%%%%%%%%%%%%%%%%%%%%%%%%%%%														misc-RNA_3465 59 3' CUUACAUUGUUAU 5' 47
N646_1652 21														|||||||||||
misc_RNA_3465 26 3' GUCUUUCCUGUUUUC 5' 12														N646_3181 -72 5' AAAUGUAACAAUU 3' -60
||||||||:|:||
N646_1652 -15 5' AAGAAAGGAUAGAAA 3' -1														Energy: -8.67
														p-value: 0.043
Energy: -9.34														543973313 gene product: methyl-accepting chemotaxis protein
p-value: 0.032
543943566 gene product: 2-C-methyl-D-erythritol 2,4-cyclodiphosphate synthase														%%%%%%%%%%%%%%%%%%%%%%%%%%%%%%%%%%%%%%%%%%%%%%%%%%%%%%%%%%%%%%%%%%%%%%%%%%%%%%%%
														N646_3780 22
%%%%%%%%%%%%%%%%%%%%%%%%%%%%%%%%%%%%%%%%%%%%%%%%%%%%%%%%%%%%%%%%%%%%%%%%%%%%%%%%														misc-RNA_3465 78 3' GCGCUUCAG 5' 70
N646_2885 22														|||||||
misc_RNA_3465 79 3' AGCGCUUCAGA 5' 69														N646_3780 -12 5' AGCGAAGUA 3' -4
:|||||||:
N646_2885 -67 5' AUGCGAAGUUA 3' -57														Energy: -8.65
														p-value: 0.043
Energy: -8.94														543973911 gene product: putative glycine betaine transporter
p-value: 0.038
543944776 gene product: hypothetical protein														%%%%%%%%%%%%%%%%%%%%%%%%%%%%%%%%%%%%%%%%%%%%%%%%%%%%%%%%%%%%%%%%%%%%%%%%%%%%%%%%
														N646_3584 23
%%%%%%%%%%%%%%%%%%%%%%%%%%%%%%%%%%%%%%%%%%%%%%%%%%%%%%%%%%%%%%%%%%%%%%%%%%%%%%%%														misc-RNA_3465 31 3' AGUAGU-CUUUCCUGUU 5' 15
N646_2431 23														||: : |||||||:|
misc_RNA_3465 45 3' CUCGGUUAGAUAA 5' 33														N646_3584 -15 5' UCGGAGUGAAAGGAUAU 3' 2
:||:|||||||
N646_2431 -39 5' CGGCUAAUCUAUA 3' -27														Energy: -8.63
														p-value: 0.044
Energy: -8.85														543973715 gene product: putative ferrichrome-iron receptor
p-value: 0.040
543944324 gene product: hypothetical protein														%%%%%%%%%%%%%%%%%%%%%%%%%%%%%%%%%%%%%%%%%%%%%%%%%%%%%%%%%%%%%%%%%%%%%%%%%%%%%%%%
														N646_3482 24
%%%%%%%%%%%%%%%%%%%%%%%%%%%%%%%%%%%%%%%%%%%%%%%%%%%%%%%%%%%%%%%%%%%%%%%%%%%%%%%%														misc-RNA_3465 23 3' UUUCCUGUUUUCC- 5' 11
N646_0571 24														||||| :|||||
misc_RNA_3465 26 3' GUC-UUUCCUGUUUU 5' 13														N646_3482 -14 5' CAAGGAAGAAAGGA 3' -1
|| ||||||||||
N646_0571 -26 5' AAGAAAAGGACAAAC 3' -12														Energy: -8.55
														p-value: 0.045
Energy: -8.62														543973614 gene product: response regulator
p-value: 0.044
543942485 gene product: putative Rhs-family protein														%%%%%%%%%%%%%%%%%%%%%%%%%%%%%%%%%%%%%%%%%%%%%%%%%%%%%%%%%%%%%%%%%%%%%%%%%%%%%%%%
														N646_3295 25
%%%%%%%%%%%%%%%%%%%%%%%%%%%%%%%%%%%%%%%%%%%%%%%%%%%%%%%%%%%%%%%%%%%%%%%%%%%%%%%%														misc-RNA_3465 72 3' AGAUAAGUCUUA 5' 60
N646_2802 25														|:|||||||||
misc_RNA_3465 29 3' GUAG-UCUUUCCUGUU 5' 15														N646_3295 -80 5' UUUAUUCAGAAC 3' -69
||| | ||||||||
N646_2802 -19 5' AAUCAAUAAAGGACAU 3' -4														Energy: -8.55
														p-value: 0.045
Energy: -8.56														543973427 gene product: hypothetical protein
p-value: 0.045
543944693 gene product: hypothetical protein														%%%%%%%%%%%%%%%%%%%%%%%%%%%%%%%%%%%%%%%%%%%%%%%%%%%%%%%%%%%%%%%%%%%%%%%%%%%%%%%%
														N646_3634 26
%%%%%%%%%%%%%%%%%%%%%%%%%%%%%%%%%%%%%%%%%%%%%%%%%%%%%%%%%%%%%%%%%%%%%%%%%%%%%%%%														misc-RNA_3465 29 3' GUAGUCUUUCCUGUUU 5' 14
N646_3067 26														|||||||||| :||
misc_RNA_3465 55 3' CAUUGUUAUACUCGGUU 5' 39														N646_3634 -48 5' AAUCAGAAAGG-UAAC 3' -34
||| |||||||||:|
N646_3067 -8 5' AUAAGAAUAUGAGCUAC 3' 9														Energy: -8.52
														p-value: 0.046
Energy: -8.45														543973765 gene product: hypothetical protein
p-value: 0.047
543944958 gene product: ATP-dependent Clp protease proteolytic subunit
%%%%%%%%%%%%%%%%%%%%%%%%%%%%%%%%%%%%%%%%%%%%%%%%%%%%%%%%%%%%%%%%%%%%%%%%%%%%%%%%
N646_1448 27
misc_RNA_3465 48 3' AUACUCGGUU 5' 39
:|||||||
N646_1448 -16 5' AGUGAGCCAC 3' -7
Energy: -8.32
p-value: 0.049
543943362 gene product: prolyl-tRNA synthetase
%%%%%%%%%%%%%%%%%%%%%%%%%%%%%%%%%%%%%%%%%%%%%%%%%%%%%%%%%%%%%%%%%%%%%%%%%%%%%%%%
N646_0266 28
misc_RNA_3465 54 3' AUUGUUAUACUCGGUUAGAU- 5' 35
||| |||||||: ||||
N646_0266 -5 5' GAAC--UAUGAGCU-CUCUAC 3' 13
Energy: -8.3
p-value: 0.050
543942180 gene product: oxidoreductase, acyl-CoA dehydrogenase family protein

## Sheet: CopraRNA-200-100
target_name	target_start_pos	target_end_pos	sRNA_name	sRNA_start_pos	sRNA_end_pos	energy	p-value			fdr	p-value	NC_022359	NZ_CP009355	NC_005139	NZ_CP009265	NC_011744	NC_004603	NC_009784	Annotation	Additional homologs	Amount sampled
N646_RS20160	143	162	ncRNA_NC_022359	38	57	-18.165	0.000110636			0.0980386	2.54977e-05	n646_rs04930(N/A|-12.43530|0.02218640|201|231|21|47|N/A)	ix91_rs08820(N/A|-8.93599|0.05083258|201|212|55|66|GeneID:23444857)	vv_rs06165(N/A|-14.07010|0.007827184|201|231|21|47|GeneID:2624024)	jv59_rs09080(N/A|-9.37898|0.0376012|201|212|56|67|N/A)	vs_rs09195(N/A|-9.72397|0.03093192|201|209|39|47|GeneID:7161520)	vp1953(N/A|-15.20860|0.00444428|201|231|21|47|GeneID:1189464)	vibhar_rs12900(N/A|-14.85390|0.004683055|201|231|21|47|GeneID:5555921)	threonylcarbamoyl-AMP synthase		0
N646_RS22305	248	280	ncRNA_NC_022359	22	51	-18.0474	0.000127755			0.135454	8.19765e-05	n646_rs09215(N/A|-13.39380|0.01096565|186|211|37|65|N/A)	ix91_rs13485(N/A|-14.66120|0.0001843568|178|267|8|87|GeneID:23445790)	vv_rs14625(N/A|-13.33800|0.01310313|188|211|37|59|GeneID:2625883)	jv59_rs00450(N/A|-10.04540|0.02256444|183|211|57|84|N/A)	vs_rs13340(N/A|-6.27890|0.2755561|187|195|6|14|GeneID:7162324)	vp2775(N/A|-14.87340|0.00564868|186|211|37|65|GeneID:1190325)	vibhar_rs00280(N/A|-11.72360|0.04037666|188|212|35|59|GeneID:5553936)	sulfurtransferase		0
N646_RS15680	124	155	ncRNA_NC_022359	17	45	-17.9975	0.000135711			0.135454	0.000105686	n646_rs02885(N/A|-10.78260|0.06613804|201|209|39|47|N/A)	ix91_rs07375(N/A|-10.89580|0.01061986|201|209|58|66|GeneID:23444568)	vv_rs08260(N/A|-11.00520|0.05824622|207|215|39|47|GeneID:2624477)	jv59_rs06960(N/A|-10.54230|0.01512500|201|209|59|67|N/A)	vs_rs06835(N/A|-12.38540|0.003171601|201|209|39|47|GeneID:7161031)	vp1544(N/A|-10.50720|0.08686628|207|215|39|47|GeneID:1189051)	vibhar_rs10815(N/A|-9.20522|0.1679192|168|209|39|74|GeneID:5555990)	cytochrome c oxidase cbb3-type subunit I		0
N646_RS06395	188	216	ncRNA_NC_022359	42	74	-17.6216	0.000211444			0.182958	0.000202544	n646_rs12280(N/A|-11.19390|0.0511025|20|28|39|47|N/A)	ix91_rs01255(N/A|-9.97579|0.02296048|22|30|58|66|GeneID:23443344)	vv_rs02210(N/A|-10.27220|0.08888858|23|31|39|47|GeneID:2623163)	jv59_rs13735(N/A|-10.53450|0.01522226|22|30|59|67|N/A)	vs_rs13195(N/A|-11.08610|0.01036193|20|28|39|47|GeneID:7162296)	vp0279(rpsM|-11.19390|0.05919716|20|28|39|47|GeneID:1187746)	vibhar_rs03545(N/A|-10.80930|0.06996064|20|28|39|47|GeneID:11031898)	30S ribosomal protein S13		0
N646_RS03435	198	260	ncRNA_NC_022359	9	64	-17.2644	0.000316527			0.182958	0.000308459	n646_rs07360(N/A|-10.63740|0.07228506|200|207|41|48|N/A)	ix91_rs11990(N/A|-9.42320|0.03536981|200|207|60|67|GeneID:23445491)	vv_rs12775(N/A|-10.46340|0.07978262|200|207|41|48|GeneID:2625488)	jv59_rs02180(N/A|-9.14060|0.04482206|200|207|61|68|N/A)	vs_rs11590(N/A|-11.84140|0.005304035|200|207|41|48|GeneID:7162001)	vp2437(N/A|-10.61600|0.08184311|200|207|41|48|GeneID:1189950)	vibhar_rs15785(N/A|-10.64570|0.07690308|200|207|41|48|GeneID:5553153)	nucleoside transporter NupC		0
N646_RS23140	5	75	ncRNA_NC_022359	6	75	-17.1584	0.000355663			0.182958	0.000347844	n646_rs11395(tatA|-15.68860|0.001573393|189|236|26|75|N/A)	ix91_rs14805(tatA|-5.13423|0.4661743|67|79|61|72|GeneID:23446054)	vv_rs01215(tatA|-15.78020|0.002128809|198|236|26|64|GeneID:2622947)	jv59_rs15585(tatA|-4.55795|0.5879434|286|296|55|65|N/A)	vs_rs00455(tatA|-7.07284|0.1794681|25|41|26|45|GeneID:7159776)	vp0098(tatA|-17.16920|0.0009880034|189|236|26|75|GeneID:1187565)	vibhar_rs02645(tatA|-18.59140|0.0001788487|189|236|26|75|GeneID:5554778)	protein translocase TatA		0
N646_RS08055	180	225	ncRNA_NC_022359	25	65	-16.6637	0.000602027			0.182958	0.000476123		ix91_rs08925(N/A|-8.01335|0.09648752|107|116|52|61|GeneID:23444878)	vv_rs09715(N/A|-13.86960|0.00903473|154|165|34|45|GeneID:2624830)	jv59_rs09290(N/A|-13.20630|0.001280373|99|124|61|85|N/A)	vs_rs08345(N/A|-5.79924|0.3481580|110|145|34|68|GeneID:7161351)	vp1440(N/A|-11.94160|0.03822526|146|188|20|53|GeneID:1188947)	vibhar_rs11830(N/A|-13.67880|0.01107047|144|188|20|55|GeneID:5554923)			1
N646_RS02435	149	165	ncRNA_NC_022359	35	50	-16.3494	0.000829204			0.182958	0.000503741	n646_rs18010(tnaA|-11.89280|0.03228427|239|248|37|46|N/A)	ix91_rs23170(tnaA|-10.19490|0.01922391|255|263|56|64|GeneID:23447727)	vv_rs21900(tnaA|-9.95337|0.1060682|248|256|38|46|GeneID:2622187)	jv59_rs24305(tnaA|-7.04447|0.1789449|177|185|53|61|N/A)	vs_rs05915(tnaA|-10.24340|0.02071590|249|255|39|45|GeneID:7160842)	vpa0192(tnaA|-12.78110|0.02283781|240|248|37|45|GeneID:1190879)	vibhar_rs25850(tnaA|-12.37120|0.0267817|240|248|37|45|GeneID:5558109)	L-cysteine desulfhydrase		0
N646_RS23280	189	209	ncRNA_NC_022359	39	59	-16.1395	0.00102101			0.182958	0.000514226	n646_rs11640(N/A|-11.75860|0.0353336|194|219|29|53|N/A)	ix91_rs00425(N/A|-11.58540|0.005688964|196|215|52|72|GeneID:23443178)	vv_rs01440(N/A|-13.25380|0.01388226|201|222|26|47|GeneID:2623001)	jv59_rs14805(N/A|-11.58230|0.00618463|203|215|53|65|N/A)	vs_rs00690(N/A|-5.96696|0.3215554|201|208|40|47|GeneID:7159826)	vp0150(N/A|-11.09200|0.06273376|201|219|29|47|GeneID:1187617)	vibhar_rs02890(N/A|-11.28950|0.05264773|179|208|40|65|GeneID:5554721)	RNA-binding transcriptional accessory protein		0
N646_RS10455	88	119	ncRNA_NC_022359	26	66	-16.0648	0.00109832			0.182958	0.000591201	n646_rs13230(xerD|-9.87936|0.1128423|3|22|41|57|N/A)	ix91_rs02230(xerD|-7.23704|0.1577961|11|17|59|65|GeneID:23443539)	vv_rs03445(xerD|-12.59860|0.02153879|1|20|41|57|GeneID:2623434)	jv59_rs01475(xerD|-10.58170|0.01464213|263|277|6|20|N/A)	vs_rs02360(xerD|-9.30225|0.04224169|9|29|41|60|GeneID:7160144)	vp0509(xerD|-11.65060|0.04542809|122|136|32|46|GeneID:1187977)	vibhar_rs04530(xerD|-11.20540|0.05537459|2|21|41|57|GeneID:5555320)	site-specific tyrosine recombinase XerD		0
N646_RS21320	1	34	ncRNA_NC_022359	28	63	-16.0347	0.00113093			0.182958	0.000593227	n646_rs06205(N/A|-13.16880|0.01300336|182|207|41|67|N/A)	ix91_rs04475(N/A|-9.53709|0.0324153|177|209|58|91|GeneID:23443988)	vv_rs11565(N/A|-7.37484|0.3674014|201|209|39|47|GeneID:2625235)	jv59_rs11000(N/A|-8.10354|0.09223573|201|207|61|67|N/A)	vs_rs04180(N/A|-10.96070|0.01152721|201|209|39|47|GeneID:7160498)	vp2192(N/A|-13.52510|0.01416274|179|207|41|72|GeneID:1189705)	vibhar_rs14475(N/A|-12.53530|0.02406825|182|207|41|67|GeneID:5553734)	aspartate-semialdehyde dehydrogenase		0
N646_RS04750	188	242	ncRNA_NC_022359	25	74	-15.8712	0.0013237			0.182958	0.000632407	n646_rs11460(N/A|-10.56000|0.07575672|186|222|40|74|N/A)	ix91_rs14750(N/A|-12.14990|0.003302176|201|222|59|80|GeneID:23446043)	vv_rs01265(N/A|-13.74250|0.009885736|199|222|40|63|GeneID:2622959)	jv59_rs15640(N/A|-7.60218|0.1274661|70|76|59|65|N/A)	vs_rs00515(N/A|-9.49950|0.03656802|69|75|39|45|GeneID:7159788)	vp0114(N/A|-11.34090|0.05440691|201|222|40|61|GeneID:1187581)	vibhar_rs02700(N/A|-6.97144|0.4512076|83|89|39|45|GeneID:5554542)	coproporphyrinogen III oxidase		0
N646_RS04550	48	83	ncRNA_NC_022359	35	72	-15.833	0.00137278			0.182958	0.000680639	n646_rs06145(N/A|-11.58320|0.0396982|176|186|35|45|N/A)	ix91_rs04750(N/A|-9.95682|0.02331231|181|190|54|63|GeneID:23444043)	vv_rs11510(N/A|-14.60860|0.00527568|174|186|35|47|GeneID:2625220)	jv59_rs10735(N/A|-9.64461|0.03078322|180|189|55|64|N/A)	vs_rs04245(N/A|-5.13062|0.4656514|272|291|51|72|GeneID:7160511)	vp2180(N/A|-13.37730|0.01559813|159|186|35|66|GeneID:1189693)	vibhar_rs14405(N/A|-13.86890|0.00967494|176|186|35|45|GeneID:5553621)	adenine phosphoribosyltransferase		0
N646_RS11395	189	236	ncRNA_NC_022359	26	75	-15.6886	0.00157339			0.182958	0.000717065	n646_rs13770(N/A|-11.45860|0.04307852|68|92|32|55|N/A)	ix91_rs03450(N/A|-7.29602|0.1522475|68|90|52|74|GeneID:23443783)	vv_rs03975(N/A|-10.99990|0.05842921|34|58|32|55|GeneID:2623547)	jv59_rs11835(N/A|-9.63634|0.03097770|80|103|53|75|N/A)	vs_rs02855(N/A|-8.72642|0.06339678|88|107|25|45|GeneID:7160243)	vp0612(engA|-12.48190|0.02751956|68|92|32|55|GeneID:1188087)	vibhar_rs05085(N/A|-13.28140|0.01459496|54|78|32|55|GeneID:5555608)	ribosome biogenesis GTPase Der		0
N646_RS14960	193	216	ncRNA_NC_022359	21	45	-15.682	0.00158316			0.182958	0.000832399	n646_rs06390(N/A|-12.07930|0.02843142|194|208|40|55|N/A)	ix91_rs04615(N/A|-9.28072|0.03939621|187|208|59|86|GeneID:23444016)	vv_rs11730(N/A|-11.59170|0.04087349|194|208|40|55|GeneID:2625269)	jv59_rs10870(N/A|-8.45825|0.07262828|191|208|60|79|N/A)	vs_rs03905(N/A|-8.19464|0.09043008|199|208|40|49|GeneID:7160441)	vp2229(N/A|-11.49850|0.04965729|194|208|40|55|GeneID:1189742)	vibhar_rs14660(N/A|-11.99340|0.03410181|194|208|40|55|GeneID:5554175)	chemotaxis protein CheA		0
N646_RS02780	196	219	ncRNA_NC_022359	37	66	-15.5642	0.00176688			0.182958	0.000862652	n646_rs04895(sirA|-11.36390|0.04581306|270|299|41|72|N/A)	ix91_rs06145(sirA|-8.68233|0.06099022|95|134|54|89|GeneID:23444322)	vv_rs06205(sirA|-9.81887|0.1141226|277|299|41|63|GeneID:2624033)	jv59_rs04960(sirA|-10.60300|0.01438689|171|179|57|65|N/A)	vs_rs09160(sirA|-8.08559|0.09703296|172|178|39|45|GeneID:7161513)	vp1945(N/A|-12.75540|0.02320951|276|299|41|64|GeneID:1189456)	vibhar_rs12865(sirA|-12.80420|0.02015344|277|299|41|63|GeneID:5555734)	DNA-binding response regulator		0
N646_RS18970	184	210	ncRNA_NC_022359	41	65	-15.3471	0.0021562			0.182958	0.000871957	n646_rs14600(N/A|-11.74320|0.03569919|56|77|37|59|N/A)	ix91_rs11075(N/A|-7.11790|0.1694907|74|81|57|64|GeneID:23445308)	vv_rs04920(N/A|-14.04590|0.007964675|235|266|37|66|GeneID:2623761)	jv59_rs03120(N/A|-10.60390|0.01437619|60|83|57|81|N/A)	vs_rs03725(N/A|-8.38656|0.07972575|258|264|39|45|GeneID:7160405)	vp0782(flgH|-7.72532|0.3335669|28|34|37|43|GeneID:1188279)	vibhar_rs06110(N/A|-11.04110|0.06106345|54|77|37|61|GeneID:5553191)	flagellar basal body L-ring protein		0
N646_RS14315	178	222	ncRNA_NC_022359	28	71	-15.3235	0.00220284			0.182958	0.000927766	n646_rs06455(N/A|-10.91730|0.06084209|194|216|31|55|N/A)	ix91_rs04370(N/A|-7.69029|0.1190445|194|214|52|74|GeneID:23443967)	vv_rs11795(N/A|-12.21180|0.0276832|196|216|31|52|GeneID:2625282)	jv59_rs11100(N/A|-8.39161|0.0760113|201|214|53|67|N/A)	vs_rs03840(N/A|-8.87239|0.05731727|185|215|32|69|GeneID:7160428)	vp2242(fliM|-11.99500|0.03702104|194|216|31|55|GeneID:1189755)	vibhar_rs14725(N/A|-11.83900|0.03757657|194|216|31|55|GeneID:5553979)	flagellar motor switch protein FliM		0
N646_RS05530	178	224	ncRNA_NC_022359	29	70	-14.9824	0.00298579			0.182958	0.000948522	n646_rs12275(rpmJ|-9.93665|0.1092278|285|291|39|45|N/A)	ix91_rs01250(rpmJ|-9.42137|0.03541914|285|291|58|64|GeneID:23443343)	vv_rs02205(rpmJ|-9.54478|0.1321420|285|291|39|45|GeneID:23638864)	jv59_rs13740(rpmJ|-9.37696|0.03765779|285|291|59|65|N/A)	vs_rs13200(rpmJ|-11.21550|0.009270472|283|291|39|47|GeneID:7162297)	vp0278(rpmJ|-9.93665|0.1178098|285|291|39|45|GeneID:1187745)	vibhar_rs03540(rpmJ|-9.83892|0.1205235|285|291|39|45|GeneID:5555448)	50S ribosomal protein L36		0
N646_RS12785	39	80	ncRNA_NC_022359	26	72	-14.8142	0.00345684			0.182958	0.00101434	n646_rs10970(N/A|-10.34210|0.08630156|261|284|20|45|N/A)	ix91_rs00060(N/A|-8.92961|0.05106887|261|268|57|64|GeneID:23443105)	vv_rs00380(N/A|-14.97350|0.00400652|261|284|20|45|GeneID:2622772)	jv59_rs15165(N/A|-4.96392|0.5051667|237|247|11|22|N/A)	vs_rs00175(N/A|-8.10704|0.09570327|10|41|29|60|GeneID:7159733)	vp0025(N/A|-11.79620|0.04168477|261|284|20|45|GeneID:1187481)	vibhar_rs02125(N/A|-14.30890|0.007037234|261|284|20|45|GeneID:5553214)	sulfurtransferase TusA		0
N646_RS09105	271	293	ncRNA_NC_022359	40	60	-14.7545	0.00363939			0.182958	0.00104645	n646_rs07665(N/A|-9.74642|0.1216114|97|125|39|63|N/A)	ix91_rs02345(N/A|-11.24580|0.007777084|88|151|29|85|GeneID:23443562)	vv_rs13115(N/A|-10.60840|0.07342806|95|123|39|63|GeneID:2625563)	jv59_rs01590(N/A|-7.43456|0.1414790|118|124|59|65|N/A)	vs_rs11880(N/A|-8.36520|0.08086144|115|121|39|45|GeneID:7162056)	vp2495(N/A|-12.73420|0.02352025|89|125|39|66|GeneID:1190010)	vibhar_rs16090(N/A|-12.92420|0.0185999|87|123|39|66|GeneID:5556149)	aconitate hydratase B		0
N646_RS19320	59	99	ncRNA_NC_022359	25	65	-14.6354	0.00402956			0.182958	0.00104684	n646_rs17190(N/A|-12.85970|0.01635058|179|218|26|65|N/A)	ix91_rs23135(N/A|-8.25531|0.08203646|201|215|52|66|GeneID:23447720)	vv_rs15850(N/A|-6.67060|0.480304|31|38|40|47|GeneID:2622679)	jv59_rs23395(N/A|-9.24789|0.0414335|201|207|61|67|N/A)	vs_rs21895(N/A|-12.38210|0.003181786|30|38|39|47|GeneID:7138794)	vpa0003(N/A|-10.04150|0.1115042|28|38|37|47|GeneID:1190682)		dipeptide/oligopeptide/nickel ABC transporter ATP-binding protein		1
N646_RS21720	234	266	ncRNA_NC_022359	12	45	-14.6069	0.00412831			0.257562	0.00163667	n646_rs06395(N/A|-17.62160|0.0002114438|188|216|42|74|N/A)	ix91_rs04610(N/A|-4.66663|0.5591067|194|204|77|87|GeneID:23444015)	vv_rs11735(N/A|-15.56400|0.002530461|188|216|42|74|GeneID:2625270)	jv59_rs10875(N/A|-5.66217|0.3730455|194|204|78|88|N/A)		vp2230(N/A|-18.00660|0.000489907|188|216|42|74|GeneID:1189743)	vibhar_rs14665(N/A|-18.02910|0.0003111548|188|216|42|74|GeneID:5554189)	protein phosphatase		1
N646_RS11125	201	211	ncRNA_NC_022359	37	47	-14.4858	0.00457249			0.257562	0.00167335	n646_rs05530(N/A|-14.98240|0.002985794|178|224|29|70|N/A)	ix91_rs09570(N/A|-6.31898|0.2658161|212|221|54|63|GeneID:23445007)	vv_rs10225(N/A|-9.33213|0.1477026|181|209|38|68|GeneID:2624938)	jv59_rs09835(N/A|-7.93530|0.1030071|71|87|58|74|N/A)	vs_rs04640(N/A|-6.83999|0.2045601|199|206|42|49|GeneID:7160591)	vp2081(N/A|-14.78310|0.006020846|178|224|29|70|GeneID:1189592)	vibhar_rs13730(N/A|-16.44230|0.001305669|178|224|29|70|GeneID:5555195)	Derived by automated computational analysis using gene prediction method: Protein Homology.		0
N646_RS22035	7	40	ncRNA_NC_022359	32	64	-14.3916	0.00494708			0.257562	0.00167465	n646_rs03415(N/A|-9.73399|0.1224592|176|218|30|69|N/A)	ix91_rs07075(N/A|-9.46212|0.03433465|2|14|52|62|GeneID:23444508)	vv_rs07615(N/A|-7.58400|0.3369932|68|85|26|43|GeneID:2624337)	jv59_rs07700(N/A|-9.79015|0.02753356|174|206|62|92|N/A)	vs_rs06315(N/A|-8.62783|0.06780893|111|117|39|45|GeneID:7160922)	vp1646(N/A|-21.79760|1.122637e-05|180|218|30|65|GeneID:1189153)	vibhar_rs11245(N/A|-8.83032|0.2023804|48|56|37|45|GeneID:5556058)	Fe/S-dependent 2-methylisocitrate dehydratase AcnD		0
N646_RS10410	222	275	ncRNA_NC_022359	22	74	-14.39	0.00495368			0.259117	0.00175215	n646_rs05590(moaC|-10.24440|0.0914179|197|222|25|53|N/A)	ix91_rs10655(moaC|-4.28068|0.6374242|155|176|54|76|GeneID:23445224)	vv_rs06050(moaC|-15.22210|0.003309029|201|222|25|47|GeneID:2624000)	jv59_rs03650(moaC|-9.33159|0.03894885|193|211|57|75|N/A)	vs_rs04580(moaC|-9.57429|0.0345978|201|213|35|47|GeneID:7160579)	vp2094(moaC|-10.31590|0.0963496|197|229|26|53|GeneID:1189605)	vibhar_rs13785(moaC|-9.06119|0.1805609|197|222|25|53|GeneID:5556172)	cyclic pyranopterin monophosphate synthase accessory protein		0
N646_RS17300	171	210	ncRNA_NC_022359	26	64	-14.3364	0.00517913			0.274793	0.00192962	n646_rs12295(N/A|-11.04960|0.05600023|276|290|40|55|N/A)	ix91_rs01270(N/A|-7.53657|0.1312087|284|290|59|65|GeneID:23443347)	vv_rs02225(N/A|-10.34980|0.08508989|276|290|40|55|GeneID:2623166)	jv59_rs13720(N/A|-8.36505|0.07739692|276|290|60|75|N/A)	vs_rs13180(N/A|-9.38460|0.03978596|284|290|40|46|GeneID:7162293)	vp0282(N/A|-11.04960|0.06425957|276|290|40|55|GeneID:1187749)	vibhar_rs03560(N/A|-11.05870|0.06043041|276|290|40|55|GeneID:5555485)	DNA-directed RNA polymerase subunit alpha		0
N646_RS09485	62	82	ncRNA_NC_022359	34	55	-14.3161	0.00526688			0.287568	0.00209412	n646_rs01285(N/A|-12.59520|0.01980078|101|149|29|72|N/A)	ix91_rs05635(N/A|-7.60545|0.1256386|110|120|53|64|GeneID:23444220)	vv_rs07160(N/A|-11.52140|0.04267761|100|150|29|74|GeneID:2624239)	jv59_rs04520(N/A|-6.02252|0.3130018|110|121|53|65|N/A)	vs_rs08615(N/A|-8.05962|0.09866345|71|78|65|72|GeneID:7161404)	vp1229(N/A|-9.54747|0.1439127|124|149|29|50|GeneID:1188734)	vibhar_rs12360(N/A|-15.59870|0.002618679|102|185|4|71|GeneID:5554119)	TetR family transcriptional regulator		0
N646_RS13870	51	68	ncRNA_NC_022359	35	53	-14.2978	0.00534713			0.295892	0.00226169	n646_rs07895(N/A|-11.55220|0.04051678|33|55|37|65|N/A)	ix91_rs12870(N/A|-11.03720|0.009375785|46|55|56|65|GeneID:23445667)	vv_rs13335(N/A|-8.31673|0.2435570|200|213|35|48|GeneID:2625609)	jv59_rs13135(N/A|-10.53090|0.01526735|47|55|57|65|N/A)	vs_rs12110(N/A|-8.78893|0.06072873|47|55|37|45|GeneID:7162099)	vp2544(N/A|-14.18660|0.009101891|32|54|37|65|GeneID:1190059)	vibhar_rs16335(N/A|-6.39454|0.5504548|47|53|37|43|GeneID:5552849)	oxaloacetate decarboxylase		0
N646_RS22595	42	72	ncRNA_NC_022359	25	55	-14.203	0.0057806			0.295892	0.00230865	n646_rs08055(N/A|-16.66370|0.000602027|180|225|25|65|N/A)	ix91_rs12545(N/A|-9.79360|0.02654165|201|214|54|66|GeneID:23445602)	vv_rs13510(N/A|-6.86439|0.4478120|187|214|35|65|GeneID:2625646)	jv59_rs12855(N/A|-10.17930|0.0202921|201|216|53|67|N/A)	vs_rs12330(N/A|-5.85973|0.3384171|201|207|41|47|GeneID:7162135)	vp2569(N/A|-12.84190|0.02197991|165|216|33|72|GeneID:1190093)	vibhar_rs16540(N/A|-14.47600|0.00622083|191|214|35|55|GeneID:5554000)	pyridoxine 5'-phosphate synthase		0
N646_RS06695	9	72	ncRNA_NC_022359	22	75	-14.199	0.00579956			0.303614	0.00248244	n646_rs15255(N/A|-10.42970|0.08192187|194|208|40|54|N/A)	ix91_rs10270(N/A|-7.98064|0.09859567|222|236|56|71|GeneID:23445147)	vv_rs05585(N/A|-10.51970|0.07726063|194|208|40|54|GeneID:2623900)	jv59_rs10630(N/A|-8.09864|0.09253539|194|208|60|74|N/A)	vs_rs10330(N/A|-9.37240|0.04014173|199|208|40|49|GeneID:7161749)	vp0917(clpP|-10.37160|0.09350016|170|184|40|54|GeneID:1188415)	vibhar_rs06700(N/A|-10.54970|0.08124953|194|208|40|54|GeneID:5553005)	ATP-dependent Clp protease proteolytic subunit		0
N646_RS06985	147	189	ncRNA_NC_022359	20	68	-14.1072	0.0062503			0.303614	0.00252682	n646_rs04550(N/A|-15.83300|0.001372779|48|83|35|72|N/A)	ix91_rs08645(N/A|-3.74568|0.7419877|168|182|70|87|GeneID:23444822)	vv_rs09970(N/A|-13.83480|0.009260835|55|77|35|59|GeneID:2624884)	jv59_rs08880(N/A|-6.44632|0.2508394|226|233|57|64|N/A)	vs_rs08390(N/A|-7.45977|0.1431148|210|218|64|72|GeneID:7161361)	vp1872(N/A|-14.28530|0.008508576|49|84|35|72|GeneID:1189379)	vibhar_rs08980(N/A|-11.45420|0.04764933|48|83|35|72|GeneID:5555204)	membrane protein		0
N646_RS10445	200	220	ncRNA_NC_022359	26	48	-14.0232	0.00668991			0.314624	0.00270029	n646_rs04935(N/A|-8.35812|0.2497186|198|223|28|50|N/A)	ix91_rs08825(N/A|-9.38636|0.03637472|97|126|60|86|GeneID:23444858)	vv_rs06160(N/A|-8.89894|0.1840397|190|215|35|55|GeneID:2624023)	jv59_rs09085(N/A|-9.63537|0.03100059|111|126|61|76|N/A)	vs_rs09200(N/A|-8.92003|0.05544498|173|225|26|77|GeneID:7161521)	vp1954(N/A|-12.39380|0.02905506|98|113|41|56|GeneID:1189465)	vibhar_rs12905(N/A|-11.01830|0.06189218|99|114|41|56|GeneID:5556014)	phosphatase		0
N646_RS19975	68	76	ncRNA_NC_022359	37	45	-13.9354	0.00717875			0.359018	0.00317467	n646_rs21865(N/A|-9.90510|0.1112063|195|228|22|53|N/A)	ix91_rs20290(N/A|-8.32807|0.07806647|198|215|54|69|GeneID:23447151)	vv_rs20225(N/A|-10.35310|0.0849315|198|213|36|50|GeneID:2621812)	jv59_rs18850(N/A|-9.53581|0.03343049|210|239|59|88|N/A)	vs_rs09790(N/A|-8.19674|0.09030673|193|243|11|55|GeneID:7161642)	vpa1063(N/A|-11.27320|0.05656846|185|228|22|65|GeneID:1191758)	vibhar_rs21080(N/A|-9.89667|0.1168236|195|228|22|53|GeneID:5558800)	glycosyl transferase		0
N646_RS00080	193	226	ncRNA_NC_022359	26	72	-13.8062	0.00795618			0.387432	0.00352669	n646_rs09660(N/A|-8.80840|0.2003108|167|207|40|66|N/A)	ix91_rs00990(N/A|-8.47657|0.07046826|176|212|56|92|GeneID:23443291)	vv_rs15085(N/A|-13.82270|0.009340652|164|202|34|70|GeneID:2625979)	jv59_rs14020(N/A|-11.89200|0.004663071|154|200|53|92|N/A)	vs_rs13740(N/A|-6.58817|0.2345548|247|253|39|45|GeneID:7162406)	vp2864(N/A|-8.68735|0.2186126|190|207|40|59|GeneID:1190427)	vibhar_rs00755(N/A|-8.50392|0.2366249|111|118|37|44|GeneID:5555193)	C4-dicarboxylate ABC transporter		0
N646_RS21040	172	204	ncRNA_NC_022359	11	45	-13.7661	0.00821232			0.387682	0.00372782	n646_rs12785(N/A|-14.81420|0.003456844|39|80|26|72|N/A)	ix91_rs12495(N/A|-7.25558|0.1560349|233|268|25|65|GeneID:23445592)	vv_rs03010(N/A|-7.40483|0.3629446|31|44|27|42|GeneID:2623340)	jv59_rs12790(N/A|-7.70419|0.1195118|23|31|59|67|N/A)	vs_rs01900(N/A|-11.04180|0.01076103|21|61|39|77|GeneID:7160045)	vp0416(N/A|-11.81820|0.04114390|183|213|25|54|GeneID:1187884)	vibhar_rs04075(N/A|-7.39031|0.3842833|178|209|37|65|GeneID:5556299)	general secretion pathway protein GspB		0
N646_RS05170	50	79	ncRNA_NC_022359	26	54	-13.7439	0.00835726			0.387682	0.00375685	n646_rs03110(N/A|-8.25479|0.2621888|20|36|47|65|N/A)	ix91_rs07190(N/A|-11.80120|0.004637969|54|78|57|82|GeneID:23444531)	vv_rs07740(N/A|-7.16397|0.3996144|270|276|37|43|GeneID:2624364)	jv59_rs07595(N/A|-5.08620|0.4808354|182|220|53|93|N/A)	vs_rs06590(N/A|-10.54480|0.01627021|217|270|8|70|GeneID:7160977)	vp1619(N/A|-10.97950|0.0668542|20|60|25|65|GeneID:1189126)	vibhar_rs11085(N/A|-15.00010|0.004187730|7|56|6|66|GeneID:5555847)	ferrochelatase		0
N646_RS10520	154	188	ncRNA_NC_022359	30	68	-13.7391	0.0083889			0.387682	0.00383145	n646_rs17500(N/A|-6.46854|0.5377761|154|192|11|53|N/A)	ix91_rs18270(N/A|-10.16030|0.01977555|219|233|52|66|GeneID:23446747)	vv_rs04295(N/A|-15.19060|0.003390793|178|222|20|62|GeneID:2623620)	jv59_rs20645(N/A|-12.13080|0.003730324|213|233|53|73|N/A)	vs_rs20860(N/A|-6.88376|0.1996522|1|66|6|65|GeneID:7138569)	vpa0073(N/A|-6.33521|0.5534601|30|58|20|45|GeneID:1190752)	vibhar_rs26710(N/A|-8.38394|0.2502402|219|245|22|47|GeneID:5556713)	LysR family transcriptional regulator		0
N646_RS14710	182	222	ncRNA_NC_022359	28	68	-13.7166	0.00853862			0.390005	0.00395584	n646_rs21355(N/A|-9.58755|0.1328154|137|153|29|45|N/A)	ix91_rs19725(N/A|-8.90124|0.05213114|29|38|54|63|GeneID:23447038)	vv_rs19970(N/A|-9.84793|0.1123398|35|43|37|45|GeneID:2621757)	jv59_rs19825(N/A|-5.16579|0.4652232|46|56|53|64|N/A)	vs_rs18140(N/A|-10.97580|0.01138099|168|193|20|47|GeneID:7138001)	vpa0946(N/A|-9.00655|0.1879612|23|30|37|44|GeneID:1191635)	vibhar_rs21650(N/A|-11.50190|0.04628258|15|31|35|53|GeneID:5557545)	membrane protein		0
N646_RS13305	121	156	ncRNA_NC_022359	40	70	-13.6665	0.00888063			0.447617	0.00469549	n646_rs17250(N/A|-10.62780|0.07270813|8|16|39|47|N/A)	ix91_rs17845(N/A|-8.24059|0.08286008|190|197|57|64|GeneID:23446662)	vv_rs15910(N/A|-10.85640|0.06358036|193|222|26|55|GeneID:2622730)	jv59_rs17020(N/A|-9.64258|0.03083086|195|211|57|73|N/A)	vs_rs21715(N/A|-8.87790|0.05709798|8|16|39|47|GeneID:7138756)	vpa0017(N/A|-6.95238|0.4496213|10|16|39|45|GeneID:1190696)	vibhar_rs27150(N/A|-8.57002|0.2293618|8|16|39|47|GeneID:5558637)	ABC transporter permease		0
N646_RS22760	3	45	ncRNA_NC_022359	26	72	-13.6589	0.00893356			0.447617	0.00477303	n646_rs19385(N/A|-9.34726|0.1513370|129|138|42|51|N/A)	ix91_rs19480(N/A|-8.25613|0.08199078|165|174|61|70|GeneID:23446989)	vv_rs21260(N/A|-9.27430|0.1521856|159|168|42|51|GeneID:2622050)	jv59_rs19580(N/A|-8.34489|0.07846308|164|173|62|71|N/A)	vs_rs17635(N/A|-9.64437|0.03283661|241|249|41|49|GeneID:7137903)	vpa1198(N/A|-9.34058|0.1596394|137|146|42|51|GeneID:1191894)	vibhar_rs20250(N/A|-10.15300|0.1015359|67|91|51|74|GeneID:5557406)	nitrate reductase		0
N646_RS13215	155	181	ncRNA_NC_022359	26	53	-13.5348	0.0098387			0.45048	0.00498781	n646_rs08150(N/A|-9.83823|0.1154978|48|56|38|46|N/A)	ix91_rs12645(N/A|-10.00320|0.0224604|21|28|57|64|GeneID:23445622)	vv_rs13610(N/A|-8.54274|0.2189350|50|58|38|46|GeneID:2625667)	jv59_rs12955(N/A|-9.84287|0.02643398|23|30|58|65|N/A)	vs_rs12425(N/A|-8.08426|0.09711591|49|55|39|45|GeneID:7162617)	vp2591(N/A|-9.79943|0.1265164|49|57|38|46|GeneID:1190115)	vibhar_rs16640(N/A|-9.90367|0.1163817|48|56|38|46|GeneID:5553800)	5-formyltetrahydrofolate cyclo-ligase		0
N646_RS08105	220	265	ncRNA_NC_022359	6	47	-13.4674	0.0103638			0.45048	0.00507517	n646_rs05085(N/A|-11.95180|0.03101855|72|96|25|63|N/A)	ix91_rs05615(N/A|-7.15063|0.1662123|105|117|52|64|GeneID:23444216)		jv59_rs04495(N/A|-2.15770|0.9577836|294|300|67|73|N/A)	vs_rs05320(N/A|-14.68340|0.0002483093|177|222|28|73|GeneID:7160722)	vp1983(N/A|-9.01058|0.1875971|1|21|34|54|GeneID:1189494)	vibhar_rs13075(N/A|-6.93071|0.4579846|36|43|8|15|GeneID:5556350)	Derived by automated computational analysis using gene prediction method: Protein Homology.		1
N646_RS16575	101	131	ncRNA_NC_022359	26	70	-13.4623	0.0104046			0.45048	0.00515504	n646_rs08510(N/A|-11.04350|0.05621592|239|249|35|45|N/A)	ix91_rs12960(N/A|-5.45328|0.4062285|109|122|58|73|GeneID:23445685)	vv_rs13975(N/A|-9.92818|0.1075388|239|247|37|45|GeneID:2625748)	jv59_rs13215(N/A|-9.22762|0.04205583|239|247|57|65|N/A)	vs_rs12820(N/A|-8.38172|0.0799819|239|245|39|45|GeneID:7162217)	vp2643(N/A|-11.30900|0.0554161|279|298|24|47|GeneID:1190188)	vibhar_rs17015(N/A|-11.03560|0.06126246|239|249|35|45|GeneID:5556185)	LPS export ABC transporter permease LptF		0
N646_RS10675	184	224	ncRNA_NC_022359	26	66	-13.4332	0.0106397			0.528087	0.00618048	n646_rs10810(N/A|-10.35780|0.08550237|114|133|26|45|N/A)	ix91_rs15070(N/A|-7.28102|0.1536437|114|120|58|64|GeneID:23446107)	vv_rs15785(N/A|-12.06030|0.03049195|104|133|26|55|GeneID:2626129)	jv59_rs15305(N/A|-7.61680|0.1262999|114|120|59|65|N/A)	vs_rs14755(N/A|-7.42538|0.1460873|114|120|39|45|GeneID:7162592)	vp3071(N/A|-10.32990|0.09562644|144|163|26|45|GeneID:1190670)	vibhar_rs01980(N/A|-10.01960|0.1092653|114|133|26|45|GeneID:5553627)	ATP synthase subunit alpha		0
N646_RS17270	132	199	ncRNA_NC_022359	11	74	-13.4081	0.0108463			0.539287	0.00645181	n646_rs16255(N/A|-10.19790|0.09394125|211|246|25|53|N/A)			jv59_rs03495(N/A|-5.44778|0.4116451|5|11|59|65|N/A)		vpa1554(N/A|-20.83180|3.285116e-05|144|200|9|70|GeneID:1192250)	vibhar_rs18385(N/A|-15.69760|0.00241867|145|200|9|70|GeneID:5558147)	flagellar protein		3
N646_RS13320	1	20	ncRNA_NC_022359	26	45	-13.3984	0.0109271			0.562098	0.0068709	n646_rs15575(N/A|-8.59092|0.2231789|34|65|11|43|N/A)	ix91_rs18215(N/A|-12.11040|0.003433843|29|57|57|84|GeneID:23446736)	vv_rs20695(N/A|-10.45810|0.08002369|198|219|26|50|GeneID:2621916)	jv59_rs20895(N/A|-11.44060|0.007019627|41|54|58|71|N/A)	vs_rs17435(N/A|-8.66302|0.06620487|25|40|5|19|GeneID:7137859)	vpa1417(N/A|-4.78518|0.8104432|102|127|20|45|GeneID:1192113)	vibhar_rs19430(N/A|-6.36796|0.5551534|170|194|17|42|GeneID:5557416)	glutathione S-transferase		0
N646_RS09215	186	211	ncRNA_NC_022359	37	65	-13.3938	0.0109657			0.609247	0.00763503	n646_rs13470(N/A|-9.69494|0.1251540|57|67|37|46|N/A)	ix91_rs02785(N/A|-8.60006|0.06463956|58|68|56|65|GeneID:23443650)	vv_rs03670(N/A|-9.29735|0.1503856|57|67|37|46|GeneID:2623481)	jv59_rs12445(N/A|-7.36469|0.1476790|63|73|57|66|N/A)	vs_rs02585(N/A|-9.13641|0.04759025|56|62|40|46|GeneID:7160191)	vp0558(N/A|-9.17137|0.1735212|57|67|37|46|GeneID:1188026)	vibhar_rs04760(N/A|-9.60401|0.1365999|47|67|37|53|GeneID:5556274)	membrane protein		0
N646_RS14250	255	266	ncRNA_NC_022359	34	45	-13.3893	0.0110034			0.609247	0.00776414		ix91_rs09825(N/A|-6.34244|0.2625266|102|112|68|78|GeneID:23445058)		jv59_rs05800(N/A|-5.89545|0.3334458|293|300|61|68|N/A)	vs_rs18785(N/A|-10.33120|0.01932160|102|153|11|60|GeneID:7138139)		vibhar_rs26685(N/A|-6.19477|0.5858956|200|207|4|11|GeneID:5557181)			3
N646_RS02130	13	29	ncRNA_NC_022359	35	52	-13.388	0.0110144			0.631682	0.00824884	n646_rs02780(N/A|-15.56420|0.001766883|196|219|37|66|N/A)	ix91_rs07485(N/A|-5.99353|0.3143450|44|50|52|58|GeneID:23444590)	vv_rs08360(N/A|-8.15122|0.2628407|213|219|37|43|GeneID:2624498)	jv59_rs06855(N/A|-8.28251|0.08184221|195|219|57|87|N/A)	vs_rs06940(N/A|-8.14308|0.09350346|201|209|39|47|GeneID:7161053)	vp1523(N/A|-12.99320|0.01997069|260|282|37|65|GeneID:1189030)		ammonium transporter		1
N646_RS03680	195	232	ncRNA_NC_022359	20	65	-13.3711	0.0111574			0.631682	0.00868196	n646_rs00225(N/A|-6.42110|0.5462027|100|131|25|53|N/A)	ix91_rs09460(N/A|-9.21469|0.0413942|244|250|58|64|GeneID:23444985)	vv_rs11275(N/A|-9.64457|0.1253241|256|282|29|55|GeneID:2625168)	jv59_rs09720(N/A|-8.44204|0.07343902|18|26|59|67|N/A)	vs_rs09685(N/A|-10.04010|0.02429067|13|21|39|47|GeneID:7161620)	vp0979(N/A|-7.63158|0.3465877|141|166|26|52|GeneID:1188483)	vibhar_rs07210(N/A|-9.39249|0.1525553|192|211|26|45|GeneID:5553617)	lipoprotein transporter subunit LolE		0
N646_RS06135	84	123	ncRNA_NC_022359	29	65	-13.3231	0.0115729			0.631682	0.00871558	n646_rs05485(N/A|-9.13056|0.1697541|167|201|25|72|N/A)	ix91_rs09545(N/A|-6.61259|0.2266830|3|22|47|64|GeneID:23445002)	vv_rs10180(N/A|-10.78110|0.06643995|167|201|25|72|GeneID:2624929)	jv59_rs09810(N/A|-7.86440|0.1078538|102|128|35|61|N/A)	vs_rs04675(N/A|-9.20019|0.04546749|166|175|1|10|GeneID:7160598)	vp2072(nhaB|-9.79626|0.1267238|167|201|25|72|GeneID:1189583)	vibhar_rs13685(N/A|-8.39668|0.2487679|167|220|21|72|GeneID:5555000)	Na+/H+ antiporter NhaB		0
N646_RS12010	207	218	ncRNA_NC_022359	42	53	-13.3133	0.0116594			0.631682	0.00875282	n646_rs17290(N/A|-11.42710|0.04397187|122|149|23|47|N/A)	ix91_rs22585(N/A|-4.40763|0.6117142|162|168|60|66|GeneID:23447610)	vv_rs15940(N/A|-6.38133|0.5302942|244|254|32|42|GeneID:2622715)	jv59_rs22750(N/A|-5.95845|0.3232081|154|173|53|71|N/A)		vpa0026(N/A|-12.44260|0.0281952|110|146|26|72|GeneID:1190705)		Derived by automated computational analysis using gene prediction method: Protein Homology.		2
N646_RS02065	240	293	ncRNA_NC_022359	6	55	-13.3033	0.0117483			0.631682	0.00889406	n646_rs03435(N/A|-17.26440|0.0003165269|198|260|9|64|N/A)	ix91_rs06480(N/A|-5.14486|0.4641217|237|272|94|117|GeneID:23444389)		jv59_rs24885(N/A|-7.06490|0.1768059|6|12|61|67|N/A)	vs_rs07460(N/A|-4.85866|0.5175047|277|294|55|73|GeneID:7161169)	vp1650(N/A|-12.58700|0.02578414|216|257|26|64|GeneID:1189157)		aldehyde-activating protein		2
N646_RS06185	116	146	ncRNA_NC_022359	13	45	-13.2867	0.0118971			0.631682	0.00909242	n646_rs09255(N/A|-9.84177|0.1152673|274|299|37|64|N/A)	ix91_rs01100(N/A|-8.28371|0.08046699|97|103|58|64|GeneID:23443313)	vv_rs14665(N/A|-11.79840|0.03595707|112|200|6|101|GeneID:2625891)	jv59_rs13890(N/A|-9.05165|0.04781376|276|293|57|73|N/A)	vs_rs13380(N/A|-5.82326|0.3442705|153|159|39|45|GeneID:7162332)	vp2784(N/A|-13.93570|0.01078480|282|299|37|53|GeneID:1190334)	vibhar_rs00320(N/A|-7.75707|0.3304753|142|162|21|41|GeneID:5555202)	DNA-binding protein		0
N646_RS08825	282	298	ncRNA_NC_022359	26	43	-13.2605	0.0121354			0.631682	0.00943836	n646_rs13040(N/A|-9.58996|0.1326393|191|201|5|15|N/A)	ix91_rs12050(N/A|-10.19400|0.01923809|99|109|52|62|GeneID:23445503)	vv_rs03260(N/A|-8.21764|0.2549740|192|201|5|14|GeneID:2623393)	jv59_rs02120(N/A|-8.52602|0.06932179|99|109|53|63|N/A)	vs_rs02160(N/A|-7.73258|0.1212192|191|201|5|15|GeneID:7160096)	vp0470(N/A|-9.87077|0.1219244|191|201|5|15|GeneID:1187938)	vibhar_rs04325(N/A|-9.78626|0.1239825|191|201|5|15|GeneID:5554261)	carbamoyl-phosphate synthase small subunit		0
N646_RS13605	152	207	ncRNA_NC_022359	4	54	-13.2526	0.0122081			0.631682	0.00965732	n646_rs16200(N/A|-10.89460|0.06170812|237|251|37|52|N/A)			jv59_rs03545(N/A|-6.41723|0.2548061|237|251|57|72|N/A)		vpa1543(N/A|-6.16036|0.5838365|224|251|37|71|GeneID:1192239)	vibhar_rs18445(N/A|-10.23910|0.09679859|233|254|26|46|GeneID:5558039)	flagellar export apparatus protein FliQ		3
N646_RS17200	74	116	ncRNA_NC_022359	6	47	-13.2441	0.0122867			0.631682	0.00974413	n646_rs04750(N/A|-15.87120|0.001323699|188|242|25|74|N/A)	ix91_rs08595(N/A|-9.41495|0.03559271|197|229|56|86|GeneID:23444812)	vv_rs10165(N/A|-9.03969|0.1715229|200|230|36|62|GeneID:2624925)	jv59_rs08825(N/A|-3.75272|0.7490404|188|210|72|93|N/A)	vs_rs09015(N/A|-3.44646|0.7853488|121|127|65|71|GeneID:7161485)	vp1920(N/A|-20.44890|4.909384e-05|215|261|32|74|GeneID:1189427)	vibhar_rs12720(N/A|-18.39400|0.0002178800|188|242|25|74|GeneID:5555223)	peptidase		0
N646_RS06205	182	207	ncRNA_NC_022359	41	67	-13.1688	0.0130034			0.631682	0.00974795	n646_rs17070(N/A|-9.78794|0.1188145|201|209|39|47|N/A)	ix91_rs21580(N/A|-2.62638|0.910695|148|154|59|65|GeneID:23447409)	vv_rs23340(N/A|-12.96540|0.01688067|173|196|16|38|GeneID:2622513)		vs_rs14855(N/A|-6.68529|0.2226292|200|209|39|48|GeneID:7137323)	vpa1733(N/A|-13.94930|0.01068674|190|209|39|65|GeneID:1192429)	vibhar_rs27410(N/A|-13.57460|0.01191071|178|209|39|72|GeneID:5558827)	HlyD family type I secretion periplasmic adaptor subunit		1
N646_RS13415	189	218	ncRNA_NC_022359	26	55	-13.1179	0.0135086			0.631682	0.0098572	n646_rs04915(N/A|-10.60710|0.0736276|171|192|39|60|N/A)	ix91_rs06125(N/A|-7.47318|0.1365103|184|190|60|66|GeneID:23444318)	vv_rs06180(N/A|-10.85760|0.06353568|279|287|37|45|GeneID:2624028)	jv59_rs04925(N/A|-9.12991|0.04517268|184|192|59|67|N/A)	vs_rs09180(N/A|-5.87216|0.3364357|17|23|39|45|GeneID:7161517)	vp1949(N/A|-9.86466|0.1223121|172|192|39|59|GeneID:1189460)	vibhar_rs12885(N/A|-11.37150|0.05010397|171|192|39|60|GeneID:5555850)	dsDNA-mimic protein		0
N646_RS06705	190	246	ncRNA_NC_022359	11	65	-13.0464	0.0142479			0.637575	0.010115	n646_rs22595(N/A|-14.20300|0.005780595|42|72|25|55|N/A)		vv_rs22290(N/A|-6.36992|0.5322947|82|118|25|59|GeneID:2622272)	jv59_rs19840(N/A|-10.44260|0.01641126|3|9|59|65|N/A)		vpa0579(N/A|-14.17370|0.009182177|265|284|37|55|GeneID:1191266)	vibhar_rs20450(N/A|-6.92947|0.4581916|49|55|38|44|GeneID:5556513)	alkaline phosphatase		2
N646_RS21210	203	229	ncRNA_NC_022359	35	64	-13.0413	0.0143019			0.692911	0.0112643	n646_rs13095(N/A|-10.24020|0.09164344|181|209|39|66|N/A)	ix91_rs12295(N/A|-7.63840|0.1230430|256|263|56|63|GeneID:23445552)	vv_rs03315(N/A|-8.29828|0.2456539|209|230|30|59|GeneID:2623407)	jv59_rs01880(N/A|-9.03049|0.04855073|201|207|61|67|N/A)	vs_rs02205(N/A|-10.41730|0.01803556|201|209|39|47|GeneID:7160105)	vp0481(gltD|-6.06972|0.5996393|201|207|41|47|GeneID:1187949)	vibhar_rs04380(N/A|-8.01754|0.2952897|188|207|41|59|GeneID:5554279)	glutamate synthase subunit beta		0
N646_RS15730	136	174	ncRNA_NC_022359	1	47	-13.0266	0.0144588			0.692911	0.011529	n646_rs00470(N/A|-11.38460|0.04520275|185|238|7|65|N/A)	ix91_rs05195(N/A|-5.31062|0.4325849|44|57|61|72|GeneID:23444132)	vv_rs11010(N/A|-11.27770|0.04949409|189|228|21|63|GeneID:2625110)	jv59_rs04150(N/A|-4.48188|0.6036045|201|207|61|67|N/A)	vs_rs05090(N/A|-11.20440|0.00935991|192|225|25|62|GeneID:7160683)	vp1032(N/A|-12.69710|0.02407315|186|238|7|65|GeneID:1188536)	vibhar_rs07450(N/A|-5.83374|0.6500185|186|207|41|65|GeneID:5553398)	DNA-binding response regulator		0
N646_RS05845	3	49	ncRNA_NC_022359	9	51	-13.023	0.0144975			0.692911	0.0116392	n646_rs00610(N/A|-12.27290|0.02486623|201|216|31|47|N/A)	ix91_rs05455(N/A|-9.01113|0.04812019|201|207|60|66|GeneID:23444184)	vv_rs10855(N/A|-10.32780|0.0861523|201|208|40|47|GeneID:2625079)	jv59_rs04405(N/A|-8.35868|0.07773244|201|208|60|67|N/A)	vs_rs05235(N/A|-5.95186|0.323898|201|207|41|47|GeneID:7160711)	vp1063(N/A|-9.72064|0.1317561|201|216|31|47|GeneID:1188567)	vibhar_rs07595(N/A|-8.75362|0.2100646|201|208|40|47|GeneID:5553188)	quinolinate synthetase		0
N646_RS02950	54	67	ncRNA_NC_022359	38	51	-13.0017	0.0147281			0.692911	0.0117137		ix91_rs21135(N/A|-11.88550|0.004277064|228|240|52|64|GeneID:23447320)	vv_rs21510(N/A|-10.17610|0.09379496|255|286|22|48|GeneID:2622102)	jv59_rs17835(N/A|-8.98099|0.05031377|228|240|53|65|N/A)	vs_rs20820(N/A|-5.56829|0.3868045|91|131|40|77|GeneID:7138561)					3
										0.699866	0.0124112	n646_rs17800(N/A|-10.34220|0.08629645|43|54|20|31|N/A)	ix91_rs08100(N/A|-10.86180|0.01094008|182|220|56|92|GeneID:23444713)		jv59_rs06170(N/A|-5.40061|0.4203991|212|220|57|65|N/A)	vs_rs17990(N/A|-5.50301|0.3981263|293|299|6|12|GeneID:7137971)	vpa0150(N/A|-10.84500|0.07209231|34|58|20|49|GeneID:1190837)	vibhar_rs26065(N/A|-11.81260|0.03820138|13|34|35|55|GeneID:5558695)	ligand-gated channel protein		1
										0.699866	0.0124126	n646_rs10445(N/A|-14.02320|0.006689906|200|220|26|48|N/A)	ix91_rs14550(N/A|-5.91009|0.3276434|200|209|58|67|GeneID:23446003)	vv_rs15435(N/A|-6.01162|0.5957551|200|207|41|48|GeneID:2626055)	jv59_rs15865(N/A|-6.35643|0.2632400|200|208|60|68|N/A)	vs_rs14405(N/A|-8.52993|0.07244726|200|209|39|48|GeneID:7162527)	vp3003(N/A|-13.27830|0.01663254|200|220|26|48|GeneID:1190595)	vibhar_rs01585(N/A|-13.44570|0.01303008|200|220|26|48|GeneID:5555860)	guanosine-5'-triphosphate 3'-diphosphate pyrophosphatase		0
										0.699866	0.0125314	n646_rs14830(N/A|-11.89480|0.03224063|179|232|1|53|N/A)	ix91_rs03950(N/A|-5.59383|0.3810592|104|110|58|64|GeneID:23443883)	vv_rs05120(N/A|-9.96537|0.1053736|179|221|10|53|GeneID:2623805)	jv59_rs11505(N/A|-7.21909|0.1613038|210|221|10|20|N/A)	vs_rs10605(N/A|-5.98730|0.3184165|210|221|10|20|GeneID:7161804)	vp0828(N/A|-13.00710|0.01979476|179|232|1|53|GeneID:1188325)	vibhar_rs06310(N/A|-13.24340|0.01498032|179|232|1|53|GeneID:5554355)	transcriptional regulator		0
										0.699866	0.0125594	n646_rs15225(N/A|-7.59903|0.3511154|196|215|35|54|N/A)	ix91_rs16530(N/A|-8.34973|0.07691662|1|14|6|18|GeneID:23446399)	vv_rs23070(N/A|-10.45880|0.07999181|49|76|37|64|GeneID:2622452)	jv59_rs24225(N/A|-7.09808|0.1733747|101|125|68|93|N/A)	vs_rs10360(N/A|-8.69869|0.06461217|95|109|6|20|GeneID:7161755)	vp0910(N/A|-10.67560|0.07920036|113|128|29|44|GeneID:1188408)	vibhar_rs18300(N/A|-8.07933|0.2873258|266|281|61|75|GeneID:5558173)	C4-dicarboxylate ABC transporter		0
										0.704406	0.012824	n646_rs05015(N/A|-12.22790|0.02565767|191|234|14|59|N/A)	ix91_rs06090(N/A|-5.24665|0.4446465|190|206|61|79|GeneID:23444311)	vv_rs06105(N/A|-13.06250|0.01581122|179|209|39|71|GeneID:2624012)	jv59_rs04890(N/A|-5.32321|0.4349526|181|206|62|86|N/A)	vs_rs05375(N/A|-6.18197|0.2893548|157|165|65|73|GeneID:23366082)	vp1971(N/A|-14.03880|0.0100615|186|209|39|68|GeneID:1189482)	vibhar_rs12970(N/A|-10.29500|0.09382518|180|207|41|70|GeneID:5554562)	acyl-CoA thioesterase		0
										0.75161	0.0138789	n646_rs10415(N/A|-9.23108|0.1610033|187|211|25|51|N/A)	ix91_rs14520(N/A|-14.10010|0.0003802702|102|120|6|24|GeneID:23445997)	vv_rs15405(N/A|-8.59309|0.2137155|201|208|40|47|GeneID:2626049)	jv59_rs15895(N/A|-9.21478|0.04245429|200|208|60|68|N/A)	vs_rs14375(N/A|-5.52337|0.3945772|201|207|41|47|GeneID:7162521)	vp2996(N/A|-8.45978|0.2427066|187|211|25|51|GeneID:1190588)	vibhar_rs01555(N/A|-9.16649|0.1712469|187|211|25|51|GeneID:5555867)	ferredoxin		0
										0.754892	0.0144562	n646_rs04120(N/A|-7.32252|0.3934112|272|296|22|45|N/A)	ix91_rs17730(N/A|-4.88391|0.515384|1|12|13|25|GeneID:23446639)		jv59_rs08465(N/A|-3.55915|0.7843435|25|50|40|65|N/A)	vs_rs07385(N/A|-15.72360|5.980195e-05|145|159|6|20|GeneID:7161152)			acetyltransferase		3
										0.754892	0.0148677		ix91_rs03105(galM|-7.93217|0.1017902|88|95|57|64|GeneID:23443714)	vv_rs12560(galM|-11.16850|0.05285052|197|226|34|65|GeneID:2625444)	jv59_rs12150(galM|-7.19579|0.1635745|126|143|53|65|N/A)		vp2397(galM|-10.11130|0.1074679|102|113|34|45|GeneID:1189910)	vibhar_rs15545(galM|-6.62935|0.5093232|206|212|40|46|GeneID:5553301)			2
										0.754892	0.0151697	n646_rs20770(N/A|-10.90150|0.06144376|251|294|35|74|N/A)	ix91_rs19815(N/A|-7.41738|0.1413191|210|220|20|30|GeneID:23447056)	vv_rs19100(N/A|-7.47278|0.3529652|120|142|26|49|GeneID:2622663)	jv59_rs19905(N/A|-8.42209|0.07444751|213|226|77|90|N/A)	vs_rs18545(N/A|-8.59829|0.06918099|289|299|50|60|GeneID:7138088)	vpa0807(N/A|-7.13357|0.4207532|195|208|61|74|GeneID:1191496)	vibhar_rs22755(N/A|-11.17030|0.05654905|273|292|37|59|GeneID:5558910)	acriflavin resistance protein		0
										0.754892	0.0153687	n646_rs11425(N/A|-9.09122|0.1732785|133|211|1|66|N/A)	ix91_rs14785(N/A|-4.92296|0.5076095|90|101|61|72|GeneID:23446050)	vv_rs01235(N/A|-18.03460|0.0002968109|153|216|1|55|GeneID:2622952)	jv59_rs15605(N/A|-7.59664|0.1279102|90|101|62|73|N/A)	vs_rs00475(N/A|-6.30674|0.2716763|115|121|40|46|GeneID:7159780)	vp0104(N/A|-9.38177|0.1564009|53|100|26|75|GeneID:1187571)	vibhar_rs02665(N/A|-6.20685|0.5837463|13|37|24|47|GeneID:5554747)	delta-aminolevulinic acid dehydratase		0
										0.754892	0.0155148	n646_rs09895(N/A|-6.22523|0.5811786|99|135|7|47|N/A)	ix91_rs13680(N/A|-12.77480|0.001739556|121|135|7|21|GeneID:23445829)	vv_rs15255(N/A|-12.14880|0.02882158|62|114|12|65|GeneID:2626016)	jv59_rs00280(N/A|-14.20970|0.0004232187|119|134|7|22|N/A)	vs_rs13935(N/A|-3.18529|0.8272487|73|89|26|43|GeneID:7162444)	vp2920(N/A|-11.66450|0.04505815|80|135|7|74|GeneID:1190495)	vibhar_rs01060(N/A|-7.60120|0.3527523|93|135|7|43|GeneID:5555660)	regulator of sigma D		0
										0.754892	0.0155841		ix91_rs03090(N/A|-6.65646|0.2212143|276|287|52|64|GeneID:23443711)	vv_rs12575(N/A|-11.94850|0.03272630|171|202|10|46|GeneID:2625447)	jv59_rs12165(N/A|-4.76438|0.5455783|188|201|12|26|N/A)		vp2400(N/A|-7.92069|0.3074479|155|174|49|66|GeneID:1189913)	vibhar_rs15570(N/A|-14.49990|0.006111396|252|284|37|72|GeneID:5552953)			2
										0.754892	0.0158829	n646_rs10520(N/A|-13.73910|0.008388895|154|188|30|68|N/A)	ix91_rs14900(N/A|-10.60650|0.01363239|16|37|51|74|GeneID:23446073)	vv_rs15500(N/A|-12.80840|0.01874932|151|185|39|71|GeneID:2626070)	jv59_rs15475(N/A|-5.76307|0.3555972|288|294|53|59|N/A)	vs_rs14480(N/A|-4.63505|0.561151|209|216|65|72|GeneID:7162543)	vp3019(N/A|-11.55270|0.04811152|26|60|28|68|GeneID:1190611)	vibhar_rs01665(N/A|-7.04264|0.4394662|107|123|23|42|GeneID:5556167)	Bcr/CflA family drug resistance efflux transporter		0
										0.754892	0.0159448	n646_rs00165(N/A|-6.75160|0.4881343|116|131|39|53|N/A)	ix91_rs09520(N/A|-7.91596|0.1028776|62|70|58|66|GeneID:23444997)	vv_rs11335(N/A|-9.18068|0.1596780|1|22|41|62|GeneID:2625180)	jv59_rs09785(N/A|-12.10040|0.003838864|261|271|53|63|N/A)	vs_rs09745(N/A|-6.95242|0.1921329|282|290|63|71|GeneID:7161633)	vp0965(N/A|-8.62378|0.2251523|111|130|35|53|GeneID:1188469)	vibhar_rs07150(N/A|-9.72741|0.1279460|126|140|32|46|GeneID:5553362)	Derived by automated computational analysis using gene prediction method: Protein Homology.		0
										0.754892	0.0164352	n646_rs14325(N/A|-12.98750|0.01488364|135|151|34|53|N/A)	ix91_rs11370(N/A|-9.08317|0.04563861|100|113|56|72|GeneID:23445367)	vv_rs04610(N/A|-11.13020|0.05407464|167|196|17|53|GeneID:2623690)	jv59_rs02800(N/A|-3.25112|0.8357808|43|49|7|13|N/A)	vs_rs03305(N/A|-5.56901|0.3866805|15|21|39|45|GeneID:7160338)	vp0728(N/A|-12.73860|0.02345545|134|150|34|53|GeneID:1188203)	vibhar_rs05790(N/A|-12.88900|0.01904398|135|151|34|53|GeneID:5554039)	Derived by automated computational analysis using gene prediction method: Protein Homology.		0
										0.754892	0.016544	n646_rs14960(N/A|-15.68200|0.001583160|193|216|21|45|N/A)	ix91_rs04540(N/A|-5.29505|0.4355074|69|76|58|65|GeneID:23444001)	vv_rs05270(N/A|-9.05567|0.1701459|193|215|22|45|GeneID:2623835)	jv59_rs10940(N/A|-4.16214|0.6689683|223|232|13|22|N/A)	vs_rs10470(N/A|-6.26190|0.2779436|290|296|42|48|GeneID:7161777)	vp0857(N/A|-16.88530|0.001242546|193|216|21|45|GeneID:1188354)	vibhar_rs06455(N/A|-12.37100|0.02678517|193|216|21|45|GeneID:5555769)	iron transporter FeoA		0
										0.754892	0.0166896	n646_rs20580(N/A|-6.31171|0.5657085|1|33|24|49|N/A)	ix91_rs15245(N/A|-8.18278|0.08616266|192|209|58|74|GeneID:23446142)			vs_rs05505(N/A|-9.74500|0.03044519|201|209|39|47|GeneID:7160761)	vpa0772(N/A|-5.28548|0.7335042|285|295|34|44|GeneID:1191461)	vibhar_rs21315(N/A|-9.18682|0.1694936|200|209|39|48|GeneID:5558647)	nitrogen fixation NifW family protein		2
										0.754892	0.0170146	n646_rs13065(N/A|-10.02080|0.1040930|268|291|35|55|N/A)	ix91_rs12035(N/A|-6.55744|0.2336968|252|258|60|66|GeneID:23445500)	vv_rs03285(N/A|-8.84390|0.1891268|264|286|28|53|GeneID:2623399)	jv59_rs02135(N/A|-6.52184|0.2407484|252|264|55|67|N/A)	vs_rs02175(N/A|-9.77254|0.02981796|252|258|41|47|GeneID:7160099)	vp0475(N/A|-9.68339|0.134296|252|270|29|47|GeneID:1187943)	vibhar_rs04350(N/A|-7.99890|0.2977212|254|291|35|74|GeneID:5554191)	transcriptional regulator		0
										0.754892	0.0174434	n646_rs22205(N/A|-9.65735|0.1277936|94|102|37|45|N/A)			jv59_rs23035(N/A|-8.54450|0.06844303|287|299|6|19|N/A)		vpa0628(N/A|-13.94860|0.01069177|240|258|25|45|GeneID:1191317)	vibhar_rs20710(N/A|-11.85820|0.03712791|240|258|25|45|GeneID:5558297)	cytochrome ubiquinol oxidase subunit I		3
										0.754892	0.0176502	n646_rs09965(N/A|-6.55499|0.5224868|173|220|26|71|N/A)	ix91_rs13750(N/A|-5.99677|0.3138355|273|284|54|64|GeneID:23445843)	vv_rs15325(N/A|-11.64040|0.03966396|199|220|26|49|GeneID:2626032)	jv59_rs00205(N/A|-7.48694|0.1369712|235|241|59|65|N/A)	vs_rs14005(N/A|-10.12780|0.02268685|199|219|27|49|GeneID:7162731)	vpa0504(frcK|-10.07190|0.1097307|56|65|37|46|GeneID:1191192)	vibhar_rs01130(N/A|-6.15576|0.5928386|201|220|26|47|GeneID:5554857)	type I pantothenate kinase		0
										0.754892	0.017756	n646_rs03150(N/A|-12.11300|0.02778021|200|226|34|62|N/A)	ix91_rs07155(N/A|-7.51160|0.1332768|189|218|62|92|GeneID:23444524)	vv_rs07700(N/A|-10.55150|0.07586703|199|252|8|59|GeneID:2624356)	jv59_rs07630(N/A|-4.65037|0.5689353|81|87|40|46|N/A)	vs_rs06555(N/A|-6.95831|0.191498|67|89|37|60|GeneID:7160970)	vp1627(N/A|-13.73550|0.01232692|200|258|1|62|GeneID:1189134)	vibhar_rs11120(N/A|-8.52576|0.2342065|211|250|10|50|GeneID:5555888)	acylphosphatase		0
										0.754892	0.0179571	n646_rs14045(N/A|-8.83690|0.1974496|151|157|37|43|N/A)	ix91_rs11785(N/A|-10.33910|0.01706882|150|158|56|64|GeneID:23445450)		jv59_rs02385(N/A|-7.99102|0.09932796|154|160|57|63|N/A)	vs_rs11380(N/A|-7.24654|0.1623470|151|158|37|44|GeneID:7161958)	vp0672(N/A|-8.73189|0.2141178|113|158|37|71|GeneID:1188147)	vibhar_rs05490(N/A|-11.21200|0.05515617|149|157|37|45|GeneID:5553794)	adenine permease		1
										0.754892	0.0182012	n646_rs15140(N/A|-10.25310|0.09095217|220|230|60|70|N/A)	ix91_rs16315(N/A|-4.55273|0.5822248|244|251|80|87|GeneID:23446356)	vv_rs05450(N/A|-11.96540|0.03237938|87|95|37|45|GeneID:2623872)		vs_rs03600(N/A|-6.53188|0.2416741|9|32|20|45|GeneID:7160380)	vp0891(N/A|-12.64900|0.02480755|220|242|42|70|GeneID:1188389)		(3R)-hydroxymyristoyl-ACP dehydratase		2
										0.754892	0.0183541	n646_rs16210(N/A|-12.38060|0.023059|260|279|14|44|N/A)			jv59_rs03535(N/A|-9.44645|0.03575364|264|279|14|29|N/A)		vpa1545(N/A|-6.23398|0.5710223|201|218|25|47|GeneID:1192241)	vibhar_rs18435(N/A|-9.47436|0.1462077|264|279|14|29|GeneID:5558407)	flagellar biosynthesis protein FlhB		3
										0.754892	0.0186452	n646_rs22265(N/A|-7.75352|0.3286761|157|168|59|72|N/A)	ix91_rs20405(N/A|-8.63809|0.06292997|175|204|63|87|GeneID:23447174)		jv59_rs18685(N/A|-6.48185|0.2460547|258|268|53|63|N/A)		vpa0616(N/A|-6.18867|0.5789058|156|164|51|59|GeneID:1191305)	vibhar_rs20650(N/A|-21.16180|9.540307e-06|150|195|17|73|GeneID:5558372)	gamma-carboxygeranoyl-CoA hydratase		2
										0.754892	0.0187125	n646_rs17185(N/A|-6.26103|0.5747709|179|194|41|53|N/A)	ix91_rs23140(N/A|-8.02116|0.09598978|195|211|56|72|GeneID:23447721)	vv_rs15845(N/A|-16.22760|0.001476478|141|166|39|63|GeneID:2622746)	jv59_rs23400(N/A|-4.15626|0.6701553|162|172|37|47|N/A)	vs_rs21900(N/A|-10.68060|0.01455993|86|94|39|47|GeneID:7138795)	vpa0002(N/A|-5.25105|0.7390956|149|173|28|50|GeneID:1190681)	vibhar_rs27230(N/A|-6.23306|0.5790849|93|100|63|70|GeneID:5557715)	transcriptional regulator		0
										0.754892	0.0188535	n646_rs14780(N/A|-5.09760|0.7749717|20|45|25|45|N/A)		vv_rs05065(N/A|-11.32250|0.04817278|43|87|25|69|GeneID:2623792)	jv59_rs02935(N/A|-7.04239|0.1791638|17|23|57|63|N/A)		vp0818(N/A|-7.47193|0.369472|140|176|42|70|GeneID:1188315)	vibhar_rs06260(N/A|-10.48430|0.08433098|140|179|39|70|GeneID:5554084)	permease		2
										0.754892	0.0190587	n646_rs20225(N/A|-11.11300|0.05380049|82|91|63|72|N/A)	ix91_rs23725(N/A|-9.47365|0.03403313|277|285|56|64|GeneID:23447838)	vv_rs16780(N/A|-7.23192|0.3890704|267|273|39|45|GeneID:2621529)			vpa1079(N/A|-7.73560|0.332158|267|273|39|45|GeneID:1191774)	vibhar_rs23465(N/A|-6.48979|0.5336796|23|45|24|46|GeneID:5556523)	uridine phosphorylase		2
										0.754892	0.0191518		ix91_rs08455(N/A|-9.37800|0.03660621|113|127|60|73|GeneID:23444784)	vv_rs07540(N/A|-10.61220|0.07326764|117|126|37|46|GeneID:2624320)	jv59_rs03865(N/A|-8.64921|0.06364365|126|146|62|88|N/A)	vs_rs20670(N/A|-6.58584|0.2348465|126|132|65|71|GeneID:7138529)		vibhar_rs11355(N/A|-8.71585|0.2139298|113|122|37|46|GeneID:5553903)			2
										0.754892	0.0191668	n646_rs06240(N/A|-8.17895|0.2716121|159|171|42|53|N/A)	ix91_rs04435(N/A|-13.94460|0.0004604744|288|300|52|64|GeneID:23443980)	vv_rs11590(N/A|-11.83180|0.03521441|286|300|33|47|GeneID:2625240)	jv59_rs11040(N/A|-9.36862|0.03789224|201|219|50|67|N/A)	vs_rs04150(N/A|-3.16666|0.8300742|57|71|53|67|GeneID:7160491)	vp2199(N/A|-10.06010|0.1104162|286|299|34|47|GeneID:1189712)	vibhar_rs14510(N/A|-9.81645|0.1219894|286|298|35|47|GeneID:5553536)	Derived by automated computational analysis using gene prediction method: Protein Homology.		0
										0.754892	0.019188	n646_rs21335(N/A|-11.32130|0.04709167|53|71|28|44|N/A)	ix91_rs19700(N/A|-8.13470|0.08899334|191|202|10|21|GeneID:23447033)	vv_rs19945(N/A|-12.30050|0.02614908|182|219|28|66|GeneID:2621752)	jv59_rs19810(N/A|-6.98873|0.1848840|191|202|10|21|N/A)	vs_rs18155(N/A|-4.81298|0.5263648|242|249|62|69|GeneID:7138004)	vpa0941(N/A|-9.31957|0.1613123|53|71|28|44|GeneID:1191630)	vibhar_rs21665(N/A|-10.49010|0.08405368|168|219|28|74|GeneID:5557549)	anaerobic ribonucleoside triphosphate reductase		0
										0.754892	0.019283	n646_rs03060(N/A|-7.23971|0.406577|91|118|43|72|N/A)	ix91_rs07240(N/A|-9.60663|0.03071983|273|283|52|62|GeneID:23444541)	vv_rs08150(N/A|-9.98455|0.1042716|273|292|24|43|GeneID:2624451)	jv59_rs07540(N/A|-11.43080|0.007080968|273|283|53|63|N/A)	vs_rs06645(N/A|-6.55441|0.2388063|129|143|57|71|GeneID:7160988)	vp1608(N/A|-8.84668|0.2028619|91|118|43|72|GeneID:1189115)	vibhar_rs11035(N/A|-6.75449|0.4877693|236|261|21|53|GeneID:5555754)	Derived by automated computational analysis using gene prediction method: Protein Homology.		0
										0.754892	0.0195534	n646_rs21255(N/A|-10.54840|0.07628907|261|269|37|45|N/A)	ix91_rs19015(N/A|-2.52572|0.9211692|33|45|60|72|GeneID:23446896)	vv_rs19595(N/A|-9.04787|0.1708169|260|269|37|46|GeneID:2621670)	jv59_rs19325(N/A|-8.95382|0.05130513|21|32|82|93|N/A)	vs_rs18250(N/A|-10.77070|0.01351512|255|269|37|52|GeneID:7138023)	vpa0923(N/A|-9.13282|0.1768163|1|31|21|55|GeneID:1191612)	vibhar_rs21760(N/A|-8.25567|0.2654156|36|51|41|55|GeneID:5557445)	transcriptional activator HlyU		0
										0.754892	0.0196288	n646_rs14235(N/A|-7.62420|0.3473994|155|197|14|53|N/A)	ix91_rs11485(N/A|-5.79982|0.3457373|198|206|61|69|GeneID:23445390)	vv_rs04525(N/A|-11.65880|0.03921536|179|206|42|66|GeneID:2623673)	jv59_rs02685(N/A|-10.55030|0.01502581|182|206|62|88|N/A)	vs_rs11175(N/A|-6.58268|0.2352425|199|206|42|49|GeneID:7161916)	vp0710(N/A|-7.85367|0.3162509|258|275|35|53|GeneID:1188185)	vibhar_rs05700(N/A|-9.82170|0.1216456|108|131|25|45|GeneID:5555506)	PTS trehalose transporter subunit IIBC		0
										0.754892	0.0196331	n646_rs20825(N/A|-8.24880|0.2629247|143|164|26|45|N/A)	ix91_rs21820(N/A|-3.56158|0.7754274|79|90|61|72|GeneID:23447457)		jv59_rs16680(N/A|-7.34732|0.1492540|135|142|58|65|N/A)	vs_rs17320(N/A|-11.18690|0.009502478|46|62|34|50|GeneID:7137835)	vpa0819(N/A|-10.61240|0.08200518|143|164|26|45|GeneID:1191508)	vibhar_rs22700(N/A|-9.22122|0.1665597|240|267|26|53|GeneID:5558861)	amino acid ABC transporter permease		1
										0.771317	0.0202955	n646_rs01310(N/A|-11.61940|0.03876065|147|170|9|36|N/A)	ix91_rs09320(N/A|-8.06528|0.09321819|169|214|53|90|GeneID:23444957)	vv_rs07185(N/A|-10.83350|0.06443834|196|214|34|52|GeneID:2624244)	jv59_rs09520(N/A|-5.57014|0.3893686|109|120|52|63|N/A)	vs_rs08590(N/A|-8.76251|0.06184438|23|46|51|72|GeneID:7161399)	vp1235(N/A|-7.39855|0.3802813|245|287|5|41|GeneID:1188740)	vibhar_rs12335(N/A|-6.35661|0.5571617|43|60|26|45|GeneID:5553504)	alcohol dehydrogenase		0
										0.771317	0.0207731	n646_rs18080(N/A|-7.08940|0.4310129|122|128|39|45|N/A)	ix91_rs21100(N/A|-5.42272|0.4118085|258|270|51|64|GeneID:23447313)	vv_rs18010(N/A|-14.84460|0.004418838|66|102|39|75|GeneID:2621229)	jv59_rs17865(N/A|-6.20785|0.2846656|34|44|36|46|N/A)	vs_rs16660(N/A|-7.84009|0.1133786|218|226|39|47|GeneID:7137701)	vpa0208(N/A|-6.92653|0.4538116|11|31|51|72|GeneID:1190896)	vibhar_rs25765(N/A|-9.96001|0.1128759|164|183|12|32|GeneID:5556694)	Derived by automated computational analysis using gene prediction method: Protein Homology.		0
										0.771317	0.0209935	n646_rs04300(N/A|-10.58750|0.07450732|93|116|21|45|N/A)	ix91_rs01025(N/A|-6.32096|0.2655373|7|13|59|65|GeneID:23443298)	vv_rs16160(N/A|-9.75042|0.1184165|263|297|35|70|GeneID:2622692)			vp1521(N/A|-9.49814|0.1475413|142|188|20|66|GeneID:1189028)		Derived by automated computational analysis using gene prediction method: Protein Homology.		3
										0.771317	0.0211256	n646_rs09880(N/A|-5.87283|0.6441362|166|193|9|32|N/A)	ix91_rs00820(N/A|-12.48040|0.00236546|265|278|52|64|GeneID:23443257)	vv_rs15230(N/A|-9.91228|0.1084759|209|226|28|46|GeneID:2626009)	jv59_rs14190(N/A|-10.77740|0.01244258|238|283|28|73|N/A)	vs_rs13920(N/A|-9.52056|0.03600355|101|109|39|47|GeneID:7162441)	vp2915(N/A|-5.87905|0.6328618|268|274|39|45|GeneID:1190490)	vibhar_rs01035(N/A|-3.60380|0.9463118|20|52|21|45|GeneID:5553886)	IclR family transcriptional regulator		0
										0.771317	0.0212795	n646_rs04790(N/A|-10.86890|0.06270139|190|206|42|59|N/A)	ix91_rs04235(N/A|-9.98769|0.02274218|195|206|61|72|GeneID:23443940)	vv_rs06315(N/A|-10.86080|0.06341666|189|204|11|25|GeneID:2624055)	jv59_rs11230(N/A|-8.35753|0.07779315|189|204|11|25|N/A)	vs_rs09055(N/A|-6.19266|0.2878110|189|204|11|25|GeneID:7161494)	vp1928(N/A|-7.15938|0.4167165|165|182|42|64|GeneID:1189435)	vibhar_rs12760(N/A|-6.70258|0.4966735|198|206|42|50|GeneID:5555031)	cytochrome c nitrite reductase pentaheme subunit		0
										0.771317	0.0214058	n646_rs14345(N/A|-9.25267|0.1591709|12|21|38|47|N/A)	ix91_rs11350(N/A|-8.09150|0.09160308|260|270|53|63|GeneID:23445363)	vv_rs04630(N/A|-9.64671|0.1251811|187|219|25|62|GeneID:2623694)	jv59_rs02820(N/A|-4.55878|0.5877726|180|186|58|64|N/A)	vs_rs03325(N/A|-6.91769|0.1959090|163|203|35|72|GeneID:7160342)	vp0732(N/A|-12.38550|0.02920364|12|41|11|47|GeneID:1188207)	vibhar_rs05820(N/A|-12.19580|0.02998343|12|41|11|47|GeneID:5555194)	nucleoside triphosphate hydrolase		0
										0.771317	0.0214645	n646_rs13165(N/A|-9.25388|0.1590687|180|201|40|59|N/A)	ix91_rs12420(N/A|-7.81167|0.1101068|184|201|59|74|GeneID:23445577)	vv_rs03385(N/A|-9.06347|0.169477|183|201|40|56|GeneID:2623421)	jv59_rs12715(N/A|-8.99039|0.04997472|180|201|60|79|N/A)	vs_rs02270(N/A|-6.03022|0.311856|194|201|40|47|GeneID:7160118)	vp0496(N/A|-9.79442|0.1268443|184|201|40|55|GeneID:1187964)	vibhar_rs04455(N/A|-10.67620|0.07556512|180|201|40|59|GeneID:5553628)	threonine synthase		0
										0.772492	0.0216981	n646_rs15090(N/A|-8.98950|0.1826556|173|207|41|74|N/A)	ix91_rs16265(N/A|-8.28321|0.0804944|154|207|60|111|GeneID:23446346)	vv_rs05400(N/A|-6.33341|0.5387076|104|112|39|47|GeneID:2623862)		vs_rs03550(N/A|-8.09170|0.09665264|106|112|39|45|GeneID:7160370)	vp0881(N/A|-8.53320|0.2347255|173|218|26|74|GeneID:1188379)		beta-ketoacyl-ACP synthase II		2
										0.772881	0.0220342	n646_rs11500(N/A|-9.89583|0.1117932|106|131|28|55|N/A)	ix91_rs00295(N/A|-4.93212|0.5057904|20|26|100|106|GeneID:23443152)	vv_rs01300(N/A|-11.71600|0.03784965|112|135|28|52|GeneID:2622967)	jv59_rs14930(N/A|-6.42559|0.2536616|18|25|83|90|N/A)	vs_rs00550(N/A|-7.28929|0.1583361|181|192|37|48|GeneID:7159796)	vp0122(N/A|-9.59623|0.1403990|108|131|28|52|GeneID:1187589)	vibhar_rs02750(N/A|-10.20480|0.09866268|106|131|28|55|GeneID:5554443)	GTP-binding protein		0
										0.772881	0.0222933	n646_rs10410(fre|-14.39000|0.004953675|222|275|22|74|N/A)	ix91_rs14515(fre|-4.00902|0.691573|223|230|56|63|GeneID:23445996)	vv_rs15400(fre|-9.85390|0.1119765|88|100|31|45|GeneID:2626048)	jv59_rs15900(fre|-9.32480|0.03914539|91|97|59|65|N/A)	vs_rs14370(fre|-4.20454|0.6457574|100|122|8|26|GeneID:7162640)	vp2995(fre|-12.62120|0.02524121|222|233|63|74|GeneID:1190587)	vibhar_rs01550(fre|-13.46200|0.01288345|222|275|22|74|GeneID:5555736)	NAD(P)H-flavin reductase		0
										0.772881	0.022312	n646_rs14060(N/A|-9.25326|0.1591211|24|35|42|53|N/A)	ix91_rs11770(N/A|-8.06058|0.0935102|36|47|61|72|GeneID:23445447)	vv_rs04355(N/A|-8.57507|0.2155725|34|45|42|53|GeneID:2623635)	jv59_rs02400(N/A|-8.04841|0.09565507|18|29|62|73|N/A)	vs_rs11365(N/A|-7.92584|0.1074285|1|7|42|48|GeneID:7161954)	vp0675(N/A|-10.19500|0.1027932|23|34|42|53|GeneID:1188150)	vibhar_rs05505(N/A|-7.39898|0.3829566|21|32|42|53|GeneID:5556367)	XRE family transcriptional regulator		0
										0.778125	0.0228187	n646_rs11180(N/A|-10.19850|0.09390832|165|174|37|46|N/A)		vv_rs00590(N/A|-7.48160|0.3516820|73|82|35|44|GeneID:2622818)			vp0062(N/A|-11.78850|0.04187558|94|122|24|53|GeneID:1187529)	vibhar_rs02405(N/A|-9.07023|0.1797459|169|177|37|45|GeneID:5554550)	phosphogluconate dehydratase		3
										0.778125	0.0231051	n646_rs17405(N/A|-9.29378|0.1557276|210|234|1|25|N/A)	ix91_rs22655(N/A|-9.99885|0.02253912|195|206|61|72|GeneID:23447624)	vv_rs16025(N/A|-6.45802|0.5168975|101|149|29|74|GeneID:2622729)	jv59_rs23875(N/A|-12.01970|0.004140968|170|201|64|93|N/A)	vs_rs21385(N/A|-6.70151|0.2206814|235|241|40|46|GeneID:7138684)	vpa0053(N/A|-6.09298|0.5955826|74|98|31|53|GeneID:1190732)	vibhar_rs26860(N/A|-10.66170|0.07619866|1|26|26|52|GeneID:5556885)	transcriptional regulator		0
										0.778125	0.0233968	n646_rs14595(flgG|-6.52897|0.5270786|19|45|12|37|N/A)	ix91_rs11080(flgG|-8.07389|0.09268521|171|181|58|68|GeneID:23445309)	vv_rs04915(flgG|-8.83624|0.1898435|169|179|39|49|GeneID:2623760)	jv59_rs03115(flgG|-7.80686|0.1119263|169|179|59|69|N/A)	vs_rs03720(flgG|-10.87740|0.01236427|169|179|39|49|GeneID:7160404)	vp0781(flgG|-6.07222|0.5992033|126|152|14|47|GeneID:1188278)	vibhar_rs06105(flgG|-7.43221|0.3778955|150|182|39|74|GeneID:5553111)	flagellar basal body rod protein FlgG		0
										0.778125	0.0237694	n646_rs17840(N/A|-5.60608|0.6909246|191|217|20|45|N/A)				vs_rs18035(N/A|-11.05860|0.01060810|145|196|6|47|GeneID:7137980)	vpa0158(N/A|-5.46576|0.703679|102|109|61|68|GeneID:1190845)	vibhar_rs26010(N/A|-15.32480|0.003253998|183|229|25|70|GeneID:5557809)	Derived by automated computational analysis using gene prediction method: Protein Homology.		3
										0.778125	0.0238503		ix91_rs18735(N/A|-10.78720|0.01167299|16|46|63|92|GeneID:23446840)	vv_rs18635(N/A|-10.38350|0.08348445|16|47|42|75|GeneID:2621148)	jv59_rs22090(N/A|-5.63455|0.3779042|169|176|57|64|N/A)	vs_rs17055(N/A|-6.58882|0.2344735|148|154|42|48|GeneID:7137782)	vpa0725(N/A|-8.57987|0.2297555|168|229|13|72|GeneID:1191414)	vibhar_rs23710(N/A|-8.16084|0.2770475|269|285|28|44|GeneID:5558165)			1
										0.778125	0.0239802		ix91_rs21565(N/A|-8.43179|0.07269003|165|176|52|63|GeneID:23447406)	vv_rs18810(N/A|-11.44950|0.04459594|173|192|42|59|GeneID:2621074)	jv59_rs24350(N/A|-6.04933|0.3087931|288|299|53|63|N/A)	vs_rs14885(N/A|-9.86591|0.02777508|167|173|39|45|GeneID:7137329)	vp2137(N/A|-8.52662|0.2354327|79|94|42|58|GeneID:1189650)				2
										0.778125	0.0240014	n646_rs18860(N/A|-11.01270|0.05731599|267|287|5|25|N/A)	ix91_rs22620(N/A|-4.95511|0.5012328|129|152|61|85|GeneID:23447617)	vv_rs23110(N/A|-10.16270|0.09449727|105|125|28|47|GeneID:2622460)	jv59_rs25020(N/A|-7.63778|0.1246419|123|146|62|86|N/A)	vs_rs21645(N/A|-6.60719|0.2321837|113|119|6|12|GeneID:7138742)	vpa0387(N/A|-10.04800|0.1111230|267|287|5|25|GeneID:1191075)	vibhar_rs24955(N/A|-10.53620|0.0818775|183|207|50|75|GeneID:5556929)	LysR family transcriptional regulator		0
										0.778125	0.0245639	n646_rs01715(N/A|-7.28292|0.3996798|35|47|31|45|N/A)	ix91_rs06845(N/A|-7.51293|0.133166|94|105|51|63|GeneID:23444462)	vv_rs07410(N/A|-7.57080|0.3388649|118|129|34|45|GeneID:2624292)	jv59_rs07905(N/A|-1.76727|0.9784955|6|12|84|90|N/A)	vs_rs07840(N/A|-14.83770|0.0002036629|162|211|37|73|GeneID:7161247)	vp1324(N/A|-13.13310|0.01826314|195|217|40|68|GeneID:1188829)	vibhar_rs10065(N/A|-7.26438|0.4038342|246|262|61|77|GeneID:5554830)	23S rRNA (adenine(1618)-N(6))-methyltransferase		0
										0.778125	0.0245811	n646_rs16965(N/A|-9.30845|0.1545133|183|206|42|65|N/A)	ix91_rs16005(N/A|-11.52930|0.005994875|179|206|61|84|GeneID:23446294)	vv_rs22950(N/A|-7.00473|0.4249009|167|198|21|55|GeneID:2622425)	jv59_rs22535(N/A|-8.91983|0.05256937|63|75|53|65|N/A)	vs_rs08100(N/A|-7.53954|0.1364064|200|206|42|48|GeneID:7161302)	vpa1691(N/A|-7.52872|0.3612310|185|192|38|45|GeneID:1192387)	vibhar_rs17540(N/A|-7.78856|0.3260843|242|261|25|45|GeneID:5557762)	MFS transporter		0
										0.778125	0.0247299	n646_rs19475(N/A|-8.94509|0.1868703|187|206|42|65|N/A)	ix91_rs18670(N/A|-7.35696|0.1466786|188|206|61|84|GeneID:23446827)	vv_rs20880(N/A|-9.90100|0.1091449|182|206|42|70|GeneID:2621960)	jv59_rs19005(N/A|-6.02443|0.3127008|188|206|62|85|N/A)	vs_rs17000(N/A|-6.95926|0.1913958|1|7|39|45|GeneID:7137771)	vpa1180(N/A|-10.90180|0.06983774|181|206|42|71|GeneID:1191876)	vibhar_rs23995(N/A|-10.31190|0.0929418|181|206|42|71|GeneID:5558354)	transaldolase		0
										0.778125	0.0251998		ix91_rs03130(N/A|-3.73328|0.7442923|278|287|106|115|GeneID:23443719)	vv_rs12550(N/A|-6.28373|0.5474599|281|287|38|44|GeneID:2625442)	jv59_rs12145(N/A|-7.80822|0.1118286|285|292|57|64|N/A)		vp2393(N/A|-13.04200|0.01935922|281|297|24|44|GeneID:1189906)	vibhar_rs15540(N/A|-13.52670|0.01231606|284|299|29|45|GeneID:5553300)			2
										0.778125	0.0253396	n646_rs15735(N/A|-8.58415|0.2239204|260|275|57|74|N/A)		vv_rs17635(N/A|-12.83570|0.01841149|195|222|41|67|GeneID:2621270)			vpa1446(N/A|-8.97643|0.1907004|260|275|57|74|GeneID:1192142)	vibhar_rs19265(N/A|-10.07800|0.1058222|217|262|20|53|GeneID:5557507)	helix-turn-helix transcriptional regulator		3
										0.778125	0.0253664	n646_rs08105(N/A|-13.46740|0.01036382|220|265|6|47|N/A)	ix91_rs12595(N/A|-5.87748|0.3329333|76|82|58|64|GeneID:23445612)	vv_rs13560(N/A|-7.11905|0.4066671|57|89|23|65|GeneID:2625657)	jv59_rs12905(N/A|-12.61100|0.002345662|254|265|53|64|N/A)	vs_rs12380(N/A|-6.79119|0.2101379|221|233|55|67|GeneID:7162146)	vp2580(N/A|-8.69509|0.2178263|220|265|6|61|GeneID:1190104)	vibhar_rs16590(N/A|-6.89418|0.4640986|72|93|26|55|GeneID:5553528)	L-aspartate oxidase		0
										0.778125	0.0256801	n646_rs18115(N/A|-9.08067|0.1742333|6|27|24|45|N/A)	ix91_rs20735(N/A|-5.96264|0.3192282|281|287|58|64|GeneID:23447240)	vv_rs18025(N/A|-6.80329|0.4579554|240|252|12|24|GeneID:2621232)	jv59_rs18250(N/A|-7.49306|0.1364522|272|279|57|64|N/A)		vpa0215(N/A|-8.53134|0.2349253|6|27|24|45|GeneID:1190903)		Derived by automated computational analysis using gene prediction method: Protein Homology.		2
										0.778125	0.0257272	n646_rs20575(N/A|-4.93108|0.8003236|224|245|6|26|N/A)		vv_rs23565(N/A|-14.01260|0.008157471|240|298|10|62|GeneID:25393022)		vs_rs21505(N/A|-7.55187|0.1353925|24|32|1|9|GeneID:7138710)	vpa0771(N/A|-5.80982|0.6448785|260|272|61|72|GeneID:1191460)	vibhar_rs21310(N/A|-7.74135|0.3326812|222|253|30|62|GeneID:5558646)	acyltransferase		2
										0.778125	0.0257328	n646_rs12530(N/A|-12.36090|0.02338062|168|200|35|59|N/A)	ix91_rs01935(N/A|-5.23594|0.4466797|111|120|61|70|GeneID:23443480)	vv_rs02555(N/A|-9.50208|0.1351524|163|190|49|75|GeneID:2623241)	jv59_rs01200(N/A|-8.37489|0.07688106|178|217|53|91|N/A)	vs_rs01680(N/A|-7.19179|0.1675996|166|210|1|47|GeneID:7160003)	vp0332(N/A|-10.55260|0.0847385|167|212|35|70|GeneID:1187799)	vibhar_rs03800(N/A|-6.99874|0.4466895|286|300|20|47|GeneID:5556010)	Derived by automated computational analysis using gene prediction method: Protein Homology.		0
										0.778125	0.0259438	n646_rs09320(N/A|-8.57866|0.2245230|178|215|26|65|N/A)	ix91_rs01035(N/A|-6.00793|0.3120847|186|193|55|62|GeneID:23443300)	vv_rs14730(N/A|-17.68220|0.0004129680|167|215|26|72|GeneID:2625904)	jv59_rs13955(N/A|-7.64158|0.1243436|172|200|35|64|N/A)	vs_rs13455(N/A|-4.92082|0.5055082|168|188|50|74|GeneID:7162347)	vp2798(N/A|-7.36870|0.3847294|204|215|26|37|GeneID:1190348)	vibhar_rs00385(N/A|-7.71467|0.3364462|178|215|26|65|GeneID:5555484)	glutamine amidotransferase		0
										0.778125	0.0261062	n646_rs00195(N/A|-7.20147|0.4127294|201|224|26|47|N/A)	ix91_rs09490(N/A|-4.64990|0.5624971|200|216|52|67|GeneID:23444991)	vv_rs11305(N/A|-8.40757|0.2334248|146|164|25|42|GeneID:2625174)	jv59_rs09750(N/A|-3.25221|0.8356104|204|210|59|65|N/A)	vs_rs09715(N/A|-9.85379|0.02803311|166|207|41|72|GeneID:7161626)	vp0973(N/A|-14.95360|0.005335976|169|225|25|71|GeneID:1188477)	vibhar_rs07180(N/A|-15.42350|0.003010433|173|225|25|74|GeneID:5554494)	ribosomal-protein-serine acetyltransferase		0
										0.778465	0.0263673	n646_rs08325(N/A|-8.23324|0.2648432|197|207|41|51|N/A)	ix91_rs01675(N/A|-7.78938|0.1117053|200|207|60|67|GeneID:23443428)	vv_rs13775(N/A|-8.07693|0.2718433|104|111|37|44|GeneID:2625703)	jv59_rs00850(N/A|-8.27902|0.08203489|200|214|54|68|N/A)	vs_rs12685(N/A|-8.61665|0.06832545|200|207|41|48|GeneID:7162208)	vp2627(N/A|-8.38725|0.2507867|197|207|41|51|GeneID:1190151)	vibhar_rs16825(N/A|-8.17210|0.2756480|200|207|41|48|GeneID:5553530)	Fe(2+)-trafficking protein		0
										0.778465	0.0272023	n646_rs00690(N/A|-11.11640|0.05368466|259|291|25|59|N/A)	ix91_rs07100(N/A|-6.96036|0.1859800|208|217|52|61|GeneID:23444513)	vv_rs07645(N/A|-12.59950|0.02152606|184|218|25|53|GeneID:2624344)		vs_rs20870(N/A|-6.07411|0.3052363|173|232|25|71|GeneID:7138571)	vp1088(N/A|-9.78414|0.1275193|1|19|26|45|GeneID:1188593)	vibhar_rs08225(N/A|-7.30239|0.3978784|141|200|1|48|GeneID:5554515)	chemotaxis protein		1
										0.778465	0.0272084	n646_rs06940(N/A|-8.84148|0.1969928|52|65|56|69|N/A)	ix91_rs11535(N/A|-10.73110|0.01225259|213|221|56|64|GeneID:23445400)	vv_rs12275(N/A|-7.68668|0.3226554|56|69|56|69|GeneID:2625379)	jv59_rs02630(N/A|-12.01660|0.00415299|5|13|57|65|N/A)	vs_rs11120(N/A|-4.81072|0.5268041|44|68|1|21|GeneID:7161905)	vp2332(N/A|-10.01480|0.1130820|201|221|37|57|GeneID:1189845)	vibhar_rs15190(N/A|-8.66998|0.2186965|213|221|37|45|GeneID:5556452)	tRNA (N6-threonylcarbamoyladenosine(37)-N6)-methyltransferase TrmO		0
										0.778465	0.0273317	n646_rs09970(N/A|-6.47034|0.5374568|97|119|39|61|N/A)	ix91_rs00780(N/A|-6.08229|0.3005779|192|198|58|64|GeneID:23443249)	vv_rs15330(N/A|-12.81560|0.01865968|182|208|21|47|GeneID:2626033)	jv59_rs14405(N/A|-10.15640|0.02066559|180|198|59|73|N/A)	vs_rs14010(N/A|-4.87949|0.5134765|190|208|21|45|GeneID:7162456)	vp2931(N/A|-6.15354|0.5850248|140|164|25|52|GeneID:1190510)	vibhar_rs01135(N/A|-14.85490|0.004679493|142|180|35|75|GeneID:5556335)	bifunctional biotin--[acetyl-CoA-carboxylase] synthetase/biotin operon repressor		0
										0.778465	0.0276109	n646_rs01440(N/A|-8.23296|0.2648778|191|207|41|59|N/A)	ix91_rs08140(N/A|-6.26073|0.2741057|182|207|60|92|GeneID:23444721)	vv_rs07310(N/A|-11.77350|0.03651984|191|207|41|59|GeneID:2624272)	jv59_rs06140(N/A|-5.43308|0.4143636|201|207|61|67|N/A)	vs_rs05645(N/A|-7.94328|0.1062505|201|207|41|47|GeneID:7160790)	vp1263(hemH|-8.82093|0.2053459|191|207|41|59|GeneID:1188768)	vibhar_rs09555(N/A|-9.23608|0.1653050|191|207|41|59|GeneID:5552919)	phosphoribosylaminoimidazolesuccinocarboxamide synthase		0
										0.778465	0.0278592	n646_rs03235(N/A|-12.36260|0.02335271|65|86|37|59|N/A)	ix91_rs06315(N/A|-9.62296|0.03033317|23|37|97|111|GeneID:23444356)	vv_rs22255(N/A|-8.52329|0.2209770|271|299|22|47|GeneID:2622265)	jv59_rs22335(N/A|-5.75825|0.3564197|224|233|53|62|N/A)	vs_rs15460(N/A|-5.83363|0.3426001|221|228|4|11|GeneID:7137449)	vpa0076(N/A|-7.79280|0.3243885|198|226|37|64|GeneID:1190755)		transcriptional regulator		1
										0.778465	0.0279903	n646_rs05380(N/A|-7.97555|0.2980119|148|179|26|54|N/A)	ix91_rs09980(N/A|-9.56359|0.03175975|181|237|55|112|GeneID:23445089)	vv_rs06445(N/A|-7.29176|0.3799124|181|215|38|71|GeneID:2624082)	jv59_rs10370(N/A|-4.65143|0.5687176|9|22|61|74|N/A)	vs_rs04780(N/A|-7.02005|0.1849388|111|136|25|45|GeneID:7160619)	vp2051(N/A|-12.53090|0.02669771|149|180|26|54|GeneID:1189562)	vibhar_rs13570(N/A|-14.44790|0.006351779|148|206|1|54|GeneID:5555787)	aminodeoxychorismate lyase		0
										0.778465	0.0282918	n646_rs02700(N/A|-8.94409|0.1869660|232|263|26|53|N/A)	ix91_rs07720(N/A|-4.78424|0.5353557|216|222|39|45|GeneID:23444637)	vv_rs08455(N/A|-10.80500|0.06552033|203|263|26|72|GeneID:2624518)	jv59_rs06660(N/A|-9.07647|0.04696184|182|205|53|74|N/A)	vs_rs07015(N/A|-9.27486|0.04308722|108|117|40|49|GeneID:7161070)	vp1502(N/A|-7.21285|0.4084167|232|245|41|53|GeneID:1189009)	vibhar_rs10635(N/A|-5.86902|0.6437874|275|288|40|51|GeneID:5555321)	sigma-54-dependent Fis family transcriptional regulator		0
										0.778465	0.0283871	n646_rs12965(murE|-8.27202|0.2600799|177|184|39|46|N/A)	ix91_rs12125(murE|-5.50494|0.3968816|278|285|81|88|GeneID:23445518)	vv_rs03185(murE|-6.03644|0.5913359|2|13|37|47|GeneID:2623378)	jv59_rs02050(murE|-12.53030|0.002539578|141|177|55|85|N/A)	vs_rs02075(murE|-10.35820|0.01890986|177|190|37|51|GeneID:7160080)	vp0455(murE|-8.34732|0.2553184|177|184|39|46|GeneID:1187923)	vibhar_rs04250(murE|-6.60210|0.5140549|198|225|16|50|GeneID:5555914)	UDP-N-acetylmuramoyl-L-alanyl-D-glutamate--2 6-diaminopimelate ligase		0
										0.778465	0.0284772	n646_rs13695(N/A|-10.91230|0.06103194|189|228|26|66|N/A)	ix91_rs02860(N/A|-6.84414|0.1989135|209|219|52|62|GeneID:23443665)	vv_rs03900(N/A|-7.37830|0.3668856|189|218|34|66|GeneID:2623532)	jv59_rs12375(N/A|-6.24141|0.2797251|209|219|53|63|N/A)	vs_rs02780(N/A|-7.27123|0.1600209|31|39|39|47|GeneID:7160227)	vp0596(N/A|-11.29970|0.05571343|199|228|26|59|GeneID:1188071)	vibhar_rs05005(N/A|-11.36640|0.05025894|199|228|26|59|GeneID:5555390)	cysteine desulfurase IscS		0
										0.778465	0.0289088	n646_rs15730(N/A|-13.02660|0.01445884|136|174|1|47|N/A)		vv_rs17640(N/A|-14.37750|0.006259299|170|214|1|42|GeneID:2621271)		vs_rs21940(N/A|-4.81706|0.525572|175|189|41|55|GeneID:25120413)	vpa1445(N/A|-14.24640|0.008738048|138|175|1|45|GeneID:1192141)	vibhar_rs19270(N/A|-11.25030|0.05390363|138|176|1|45|GeneID:5557427)	calcium-binding protein		2
										0.778465	0.0290551	n646_rs09130(N/A|-7.73329|0.3315638|11|47|29|69|N/A)	ix91_rs13940(N/A|-5.55739|0.3875048|8|16|83|91|GeneID:23445881)	vv_rs14455(N/A|-10.14390|0.0954902|271|283|33|46|GeneID:2625850)	jv59_rs00015(N/A|-5.69273|0.3677105|114|120|59|65|N/A)	vs_rs13570(N/A|-12.11130|0.004124223|180|231|25|67|GeneID:7162371)	vp2758(N/A|-6.55644|0.5154644|211|234|25|42|GeneID:1190308)	vibhar_rs00195(N/A|-6.32992|0.5618887|218|234|25|44|GeneID:5555267)	acetylglutamate kinase		0
										0.778465	0.0290911	n646_rs06135(N/A|-13.32310|0.0115729|84|123|29|65|N/A)	ix91_rs04760(N/A|-8.48782|0.0699193|213|230|54|72|GeneID:23444045)	vv_rs11500(N/A|-5.99992|0.5978386|213|224|42|53|GeneID:2625218)	jv59_rs10725(N/A|-11.53420|0.006457443|213|230|55|73|N/A)	vs_rs04255(N/A|-6.07757|0.3047183|41|48|64|71|GeneID:7160513)	vp2178(N/A|-9.10739|0.1790172|99|117|35|52|GeneID:1189691)	vibhar_rs14395(N/A|-7.81078|0.3230084|213|224|42|53|GeneID:5553384)	Derived by automated computational analysis using gene prediction method: Protein Homology.		0
										0.778465	0.0291034	n646_rs19800(N/A|-6.74530|0.4892243|73|80|40|47|N/A)	ix91_rs22040(N/A|-4.21753|0.6501424|68|74|58|64|GeneID:23447501)	vv_rs22430(N/A|-18.08480|0.0002829571|196|220|25|53|GeneID:2622303)	jv59_rs23505(N/A|-8.71235|0.06089302|180|199|12|29|N/A)		vpa1017(N/A|-5.77235|0.6513646|44|59|1|16|GeneID:1191712)	vibhar_rs17975(N/A|-5.15046|0.7656555|183|194|8|22|GeneID:5558201)	AraC family transcriptional regulator		1
										0.778465	0.0292966	n646_rs19700(N/A|-11.52680|0.04119844|141|205|6|75|N/A)	ix91_rs04850(N/A|-5.28732|0.4369616|24|37|11|24|GeneID:23444063)		jv59_rs19990(N/A|-12.87450|0.001802026|156|167|54|65|N/A)	vs_rs19490(N/A|-7.26045|0.1610332|161|205|6|55|GeneID:7138284)	vp1402(N/A|-5.53256|0.6924252|112|121|61|70|GeneID:1188909)	vibhar_rs22325(N/A|-8.55515|0.2309810|141|176|37|75|GeneID:5557687)	type VI secretion system-associated protein		1
										0.778465	0.0293569		ix91_rs22445(N/A|-6.73410|0.2117746|29|41|52|63|GeneID:23447582)		jv59_rs16455(N/A|-8.81943|0.0564641|32|43|57|67|N/A)	vs_rs15310(N/A|-8.23497|0.08808562|32|43|35|45|GeneID:7137418)	vpa1299(N/A|-11.59310|0.04698744|117|135|39|55|GeneID:1191995)				3
										0.793655	0.0301974	n646_rs14100(N/A|-5.92625|0.6346414|64|90|30|55|N/A)	ix91_rs11730(N/A|-10.89050|0.01066922|5|26|68|89|GeneID:23445439)	vv_rs04395(N/A|-8.23040|0.2534824|260|269|64|73|GeneID:2623643)	jv59_rs02440(N/A|-9.34460|0.0385747|5|26|69|90|N/A)	vs_rs11325(N/A|-4.36777|0.6137689|205|211|39|45|GeneID:7161946)	vp0683(nusB|-14.17940|0.009146622|7|31|41|72|GeneID:1188158)	vibhar_rs05545(N/A|-12.43880|0.02563223|6|26|49|69|GeneID:5555330)	N utilization substance protein B		0
										0.793655	0.0303426	n646_rs15240(N/A|-9.63186|0.1296093|84|115|41|71|N/A)	ix91_rs10285(N/A|-5.18988|0.4554671|173|179|56|62|GeneID:23445150)	vv_rs05570(N/A|-11.74100|0.03726623|180|216|33|70|GeneID:2623896)	jv59_rs10645(N/A|-3.86358|0.7279792|101|107|57|63|N/A)	vs_rs10345(N/A|-8.41219|0.07838087|210|253|31|73|GeneID:7161752)	vp0914(N/A|-11.35280|0.05403465|168|207|6|43|GeneID:1188412)		C4-dicarboxylate ABC transporter		1
										0.797543	0.0308054	n646_rs15750(N/A|-11.50010|0.04192577|96|112|38|56|N/A)	ix91_rs21045(N/A|-13.25430|0.001031368|160|170|52|62|GeneID:23447302)	vv_rs17620(N/A|-6.13236|0.5742729|44|58|20|33|GeneID:2621267)	jv59_rs17915(N/A|-7.00652|0.1829721|230|242|6|18|N/A)	vs_rs15830(N/A|-6.83674|0.2049281|146|160|64|77|GeneID:7137527)	vpa1449(N/A|-7.97946|0.2998648|230|241|7|18|GeneID:1192145)	vibhar_rs19250(N/A|-8.20297|0.2718365|230|241|7|18|GeneID:5557504)	chemotaxis protein		0
										0.797543	0.0309061	n646_rs05620(N/A|-11.05540|0.05579581|181|215|34|65|N/A)	ix91_rs10685(N/A|-5.64077|0.3728415|198|206|61|69|GeneID:23445230)	vv_rs06020(N/A|-6.87205|0.4465473|201|221|35|47|GeneID:2623993)	jv59_rs03620(N/A|-6.68723|0.219686|4|15|57|68|N/A)	vs_rs04550(N/A|-8.30697|0.08402721|181|206|42|66|GeneID:7162687)	vp2100(N/A|-11.16080|0.06032606|186|215|34|64|GeneID:1189611)	vibhar_rs13830(N/A|-10.37540|0.0896861|176|215|34|74|GeneID:5554773)	excinuclease ABC subunit B		0
										0.805411	0.0314205	n646_rs13705(iscA|-11.61490|0.03887614|175|209|37|75|N/A)	ix91_rs02870(iscA|-6.20818|0.2817332|196|207|59|71|GeneID:23443667)	vv_rs03910(iscA|-9.16353|0.1610825|181|206|41|70|GeneID:2623534)	jv59_rs12365(iscA|-8.21262|0.08577535|176|182|57|63|N/A)	vs_rs21915(N/A|-5.62418|0.3772468|186|197|7|18|GeneID:7160261)	vp0598(N/A|-9.85597|0.1228653|179|209|37|71|GeneID:1188073)	vibhar_rs05015(iscA|-10.10000|0.1045492|179|209|37|71|GeneID:5555077)	iron-sulfur cluster assembly protein IscA		0
										0.821592	0.0323109	n646_rs13720(N/A|-7.70703|0.3353352|109|115|39|45|N/A)	ix91_rs02885(N/A|-7.65625|0.1216553|111|117|58|64|GeneID:23443670)	vv_rs03925(N/A|-11.23520|0.05077722|102|151|1|54|GeneID:2623537)	jv59_rs12350(N/A|-5.21813|0.4550644|109|115|59|65|N/A)	vs_rs02805(N/A|-8.39805|0.07912044|102|108|39|45|GeneID:7160232)	vp0601(N/A|-9.67020|0.1352051|3|27|31|45|GeneID:1188076)	vibhar_rs05030(N/A|-6.86873|0.4683775|164|200|9|44|GeneID:5555033)	ferredoxin 2Fe-2S type ISC system		0
										0.821592	0.032479	n646_rs14390(N/A|-8.72594|0.208765|24|33|36|45|N/A)	ix91_rs10930(N/A|-8.73395|0.0587921|26|44|55|72|GeneID:23445279)	vv_rs04725(N/A|-6.50637|0.5084998|234|240|37|43|GeneID:2623718)	jv59_rs03210(N/A|-7.89900|0.1054652|234|240|57|63|N/A)	vs_rs03435(N/A|-9.44551|0.0380506|202|208|40|46|GeneID:7160348)	vp0738(N/A|-8.96699|0.1915654|23|32|36|45|GeneID:1188233)	vibhar_rs05890(N/A|-6.90638|0.462053|23|32|36|45|GeneID:5554722)	aminoacyl-tRNA hydrolase		0
										0.833891	0.0331821	n646_rs17910(N/A|-10.10710|0.09903727|184|226|21|72|N/A)	ix91_rs11795(N/A|-6.32703|0.2646841|289|295|58|64|GeneID:23445452)	vv_rs21845(N/A|-9.95142|0.1061814|193|226|21|54|GeneID:2622174)	jv59_rs02375(N/A|-6.68614|0.2198202|289|295|59|65|N/A)	vs_rs20460(N/A|-6.63676|0.2285319|186|234|12|62|GeneID:7138493)	vpa0172(N/A|-10.11920|0.1070190|184|226|21|72|GeneID:1190859)	vibhar_rs25940(N/A|-8.97714|0.1882795|194|226|21|54|GeneID:5558533)	ribosomal protein S6 modification protein		0
										0.845946	0.0344491	n646_rs13415(N/A|-13.11790|0.01350862|189|218|26|55|N/A)	ix91_rs02730(N/A|-4.49168|0.5946354|191|238|26|73|GeneID:23443639)	vv_rs03625(N/A|-10.02760|0.1018338|13|32|23|48|GeneID:2623472)	jv59_rs12500(N/A|-10.50320|0.01561825|195|238|26|73|N/A)	vs_rs02535(N/A|-2.58122|0.906213|135|177|31|69|GeneID:7160181)	vp0548(N/A|-13.34840|0.01589385|189|218|26|55|GeneID:1188016)	vibhar_rs04715(N/A|-15.24640|0.003460140|189|218|26|55|GeneID:5553700)	peptidase M23		0
										0.845946	0.0346241	n646_rs14175(N/A|-9.36765|0.1496892|202|210|1|9|N/A)	ix91_rs04155(N/A|-6.47311|0.2447221|202|210|1|9|GeneID:23443924)	vv_rs04465(N/A|-9.03492|0.1719356|92|100|41|49|GeneID:2623661)	jv59_rs11305(N/A|-6.97818|0.1860252|202|210|1|9|N/A)	vs_rs11255(N/A|-7.59543|0.1318590|255|264|63|72|GeneID:7161932)	vp0697(xni|-9.59309|0.1406231|202|210|1|9|GeneID:1188172)	vibhar_rs05630(N/A|-8.42366|0.2456709|202|210|1|9|GeneID:5556012)	flap endonuclease Xni		0
										0.845946	0.0349491	n646_rs10715(N/A|-9.21530|0.1623530|180|208|40|74|N/A)	ix91_rs00130(N/A|-6.61491|0.2263914|201|208|59|66|GeneID:23443119)	vv_rs15690(N/A|-7.05316|0.4171275|201|207|41|47|GeneID:2626110)	jv59_rs15095(N/A|-5.60574|0.3830091|201|208|60|67|N/A)	vs_rs14675(N/A|-7.80143|0.1161486|201|207|41|47|GeneID:7162576)	vp3052(N/A|-12.44520|0.02815004|222|260|29|74|GeneID:1190651)	vibhar_rs01875(N/A|-11.83350|0.03770598|179|225|25|74|GeneID:5555829)	cytochrome c oxidase accessory protein CcoG		0
										0.845946	0.0354029	n646_rs07540(N/A|-8.36619|0.2487625|95|121|35|65|N/A)	ix91_rs02470(N/A|-5.29050|0.4363631|164|186|53|73|GeneID:23443587)	vv_rs12975(N/A|-9.96287|0.105518|259|292|20|65|GeneID:2625533)	jv59_rs01715(N/A|-6.32508|0.2676644|249|257|57|65|N/A)	vs_rs11750(N/A|-8.21626|0.08916684|142|186|34|71|GeneID:7162031)	vp2470(N/A|-10.22780|0.1010095|267|292|20|45|GeneID:1189985)	vibhar_rs15960(N/A|-8.60469|0.2256194|267|292|20|45|GeneID:5553208)	tyrosine--tRNA ligase		0
										0.845946	0.0354102		ix91_rs13640(N/A|-10.25210|0.01834180|69|86|52|70|GeneID:23445821)		jv59_rs00320(N/A|-7.86817|0.1075913|170|182|5|17|N/A)	vs_rs01160(N/A|-6.67987|0.2232829|281|292|28|39|GeneID:7159911)	vp2827(N/A|-9.20742|0.1704848|46|81|25|63|GeneID:1190390)	vibhar_rs00575(N/A|-7.29288|0.3993642|285|291|37|43|GeneID:5554947)			2
										0.845946	0.0356264		ix91_rs06510(N/A|-5.36286|0.4228440|86|99|52|64|GeneID:23444395)	vv_rs19035(N/A|-7.99841|0.2815925|70|113|27|72|GeneID:2622649)	jv59_rs22225(N/A|-8.57492|0.06701748|3|17|54|65|N/A)	vs_rs07275(N/A|-3.39391|0.7941064|68|94|37|62|GeneID:7161130)		vibhar_rs08190(N/A|-14.01770|0.00869638|210|254|35|73|GeneID:5554701)			2
										0.845946	0.035783	n646_rs11505(N/A|-6.81455|0.4772871|36|43|38|45|N/A)	ix91_rs00300(N/A|-6.80361|0.2035803|30|37|57|64|GeneID:23443153)	vv_rs01305(N/A|-8.80251|0.1930247|192|220|24|45|GeneID:2622968)		vs_rs00555(N/A|-8.72277|0.06355563|173|212|37|77|GeneID:7159797)	vp0123(N/A|-9.71383|0.1322175|195|219|28|53|GeneID:1187590)	vibhar_rs02755(N/A|-9.67349|0.1316695|184|219|28|66|GeneID:5554478)	ATPase		1
										0.845946	0.0360804	n646_rs14190(N/A|-9.83540|0.1156824|137|176|5|43|N/A)	ix91_rs04170(N/A|-4.88507|0.5151526|24|38|61|72|GeneID:23443927)	vv_rs04480(N/A|-9.17357|0.1602591|139|158|26|45|GeneID:2623664)	jv59_rs11290(N/A|-3.54155|0.7874489|10|16|61|67|N/A)	vs_rs11240(N/A|-11.75640|0.005733415|219|271|1|43|GeneID:7161929)	vp0700(N/A|-8.24551|0.2671419|4|21|26|44|GeneID:1188175)	vibhar_rs05645(N/A|-8.15518|0.2777528|198|231|32|64|GeneID:5555882)	Derived by automated computational analysis using gene prediction method: Protein Homology.		0
										0.845946	0.0361258	n646_rs10745(N/A|-9.69399|0.1252201|284|293|34|43|N/A)	ix91_rs00100(N/A|-8.70940|0.05982885|284|293|53|62|GeneID:23443113)	vv_rs15720(N/A|-10.39890|0.08275959|284|292|35|43|GeneID:2626116)	jv59_rs15125(N/A|-7.45496|0.1397092|284|293|54|63|N/A)	vs_rs14700(N/A|-5.06452|0.4780909|284|292|35|43|GeneID:7162581)	vp3058(N/A|-10.06700|0.1100149|284|293|34|43|GeneID:1190657)	vibhar_rs01915(N/A|-8.45148|0.2425071|284|292|35|43|GeneID:5554053)	acetolactate synthase 2 catalytic subunit		0
										0.845946	0.0361348	n646_rs03295(N/A|-6.55759|0.5220285|42|55|44|57|N/A)	ix91_rs22700(N/A|-6.20780|0.2817889|73|86|52|64|GeneID:23447633)		jv59_rs23795(N/A|-5.66028|0.3733768|239|256|56|71|N/A)	vs_rs20640(N/A|-7.62971|0.1291311|200|206|42|48|GeneID:7138521)		vibhar_rs19785(N/A|-10.33110|0.09194686|4|52|25|63|GeneID:5557051)	Derived by automated computational analysis using gene prediction method: Protein Homology.		2
										0.845946	0.036371	n646_rs19640(N/A|-9.83932|0.1154268|35|65|6|33|N/A)	ix91_rs04790(N/A|-5.68116|0.3658490|128|153|59|84|GeneID:23444051)		jv59_rs20050(N/A|-5.55033|0.3929316|80|86|59|65|N/A)	vs_rs19605(N/A|-10.11430|0.02292748|46|103|27|77|GeneID:7138307)	vp1389(N/A|-9.86421|0.1223407|35|65|6|33|GeneID:1188896)	vibhar_rs22390(N/A|-7.17661|0.4177614|127|133|37|43|GeneID:5556649)	Derived by automated computational analysis using gene prediction method: Protein Homology.		1
										0.845946	0.0364086	n646_rs19090(N/A|-5.81118|0.655052|126|132|39|45|N/A)	ix91_rs09175(N/A|-4.94758|0.5027243|121|146|91|115|GeneID:23444928)	vv_rs17015(N/A|-13.74620|0.009859965|192|217|27|70|GeneID:2621469)	jv59_rs09390(N/A|-8.73433|0.05996003|27|33|59|65|N/A)		vpa1272(N/A|-7.89974|0.3101820|166|187|34|56|GeneID:1191968)	vibhar_rs19925(N/A|-6.87180|0.4678605|225|253|27|57|GeneID:5557039)	Derived by automated computational analysis using gene prediction method: Protein Homology.		1
										0.845946	0.036522	n646_rs01470(N/A|-10.37890|0.08443816|250|260|33|43|N/A)	ix91_rs06635(N/A|-9.15070|0.04341422|185|199|52|67|GeneID:23444420)	vv_rs09405(N/A|-5.07905|0.7567419|155|166|20|32|GeneID:2624763)	jv59_rs08385(N/A|-9.74012|0.02861448|250|260|53|63|N/A)	vs_rs05675(N/A|-7.12941|0.1737451|250|256|37|43|GeneID:7160796)	vp1269(N/A|-10.87930|0.0707233|250|260|33|43|GeneID:1188774)	vibhar_rs09665(N/A|-8.58846|0.2273655|190|205|57|74|GeneID:5556359)	Derived by automated computational analysis using gene prediction method: Protein Homology.		0
										0.850072	0.0372421	n646_rs20780(N/A|-10.53240|0.07702857|78|113|23|66|N/A)	ix91_rs19805(N/A|-6.26534|0.2734433|200|206|61|67|GeneID:23447054)	vv_rs19110(N/A|-11.68750|0.0385247|92|126|10|47|GeneID:2622665)	jv59_rs19895(N/A|-7.50613|0.1353493|187|221|84|119|N/A)	vs_rs18535(N/A|-5.92477|0.3281271|216|259|27|70|GeneID:7138086)	vpa0809(N/A|-7.88195|0.3125163|19|43|55|74|GeneID:1191498)	vibhar_rs22745(N/A|-7.89592|0.311396|194|206|42|53|GeneID:5558908)	multidrug transporter AcrB		0
										0.850072	0.0373954		ix91_rs04955(N/A|-5.96026|0.3196064|79|91|52|63|GeneID:23444084)	vv_rs12040(N/A|-14.59450|0.005331385|197|223|25|51|GeneID:2625331)		vs_rs21825(N/A|-11.13990|0.009894985|201|220|28|47|GeneID:7138779)	vp1416(N/A|-4.94312|0.787256|239|247|41|49|GeneID:1188923)				3
										0.850072	0.0374463	n646_rs10670(N/A|-7.18379|0.4155891|149|156|39|46|N/A)	ix91_rs00170(N/A|-8.05063|0.09413095|18|54|34|74|GeneID:23443127)	vv_rs15650(N/A|-8.17207|0.2603527|149|156|39|46|GeneID:2626101)	jv59_rs15045(N/A|-8.81434|0.05666809|6|15|55|64|N/A)	vs_rs14630(N/A|-8.99293|0.05268211|149|156|39|46|GeneID:7162565)	vp3042(def|-7.01445|0.4396308|149|156|39|46|GeneID:1190641)	vibhar_rs01830(N/A|-6.78385|0.4827579|262|296|26|65|GeneID:5553807)	peptide deformylase		0
										0.850072	0.037665	n646_rs18900(N/A|-10.42700|0.08205399|201|225|22|47|N/A)		vv_rs18065(N/A|-7.26506|0.3839837|216|224|39|47|GeneID:2621240)	jv59_rs21240(N/A|-8.27424|0.08229942|200|209|59|68|N/A)	vs_rs21315(N/A|-5.44005|0.409202|236|242|66|72|GeneID:7138669)	vpa0400(N/A|-10.32810|0.09571916|201|225|22|47|GeneID:1191088)	vibhar_rs24855(N/A|-9.16403|0.17146|200|209|39|48|GeneID:5556981)	AraC family transcriptional regulator		1
										0.850072	0.0379698	n646_rs08195(N/A|-10.10180|0.09934174|175|208|3|37|N/A)	ix91_rs01815(N/A|-6.50564|0.240426|188|208|3|24|GeneID:23443456)	vv_rs13650(N/A|-6.25423|0.5526699|183|208|3|29|GeneID:2625676)	jv59_rs01085(N/A|-6.97843|0.1859981|188|208|3|24|N/A)	vs_rs12465(N/A|-9.63270|0.03312432|188|208|3|24|GeneID:7162164)	vp2600(pgk|-10.12740|0.1065548|175|208|3|37|GeneID:1190124)	vibhar_rs16685(N/A|-7.68575|0.3405572|183|208|3|29|GeneID:5554114)	phosphoglycerate kinase		0
										0.850072	0.0380266	n646_rs15325(N/A|-7.82008|0.3192845|193|209|39|55|N/A)	ix91_rs17575(N/A|-8.91147|0.0517459|154|188|56|92|GeneID:23446608)	vv_rs17850(N/A|-9.12978|0.1638755|188|229|9|51|GeneID:2621314)	jv59_rs17690(N/A|-5.52652|0.3972366|59|69|57|67|N/A)	vs_rs16195(N/A|-6.35956|0.2644178|176|192|11|26|GeneID:7137602)	vpa0429(N/A|-10.96630|0.067353|79|97|37|55|GeneID:1191117)	vibhar_rs19690(N/A|-10.67480|0.0756261|32|50|28|47|GeneID:5557155)	heme utilization protein HutZ		0
										0.851241	0.0390296	n646_rs16435(N/A|-7.89174|0.309363|180|222|21|71|N/A)		vv_rs22480(N/A|-5.76293|0.639968|139|164|21|43|GeneID:2622316)			vpa1590(N/A|-9.24296|0.1675334|279|297|20|45|GeneID:1192286)	vibhar_rs25610(N/A|-8.11359|0.2829742|152|169|8|24|GeneID:5557508)	antibiotic biosynthesis monooxygenase		3
										0.851241	0.0391068	n646_rs22115(artM|-7.20981|0.4113838|272|278|6|12|N/A)		vv_rs21710(artM|-10.96200|0.05975261|100|118|25|43|GeneID:2622145)		vs_rs07285(artM|-9.33688|0.04119337|166|194|42|72|GeneID:7161132)	vpa0639(artM|-7.50053|0.3653081|174|193|11|29|GeneID:1191328)	vibhar_rs20870(artM|-6.47044|0.5370788|183|193|11|21|GeneID:5558599)	arginine transporter permease subunit ArtM		2
										0.851241	0.0393115	n646_rs15985(N/A|-3.30375|0.9638276|98|111|39|53|N/A)		vv_rs21590(N/A|-11.62690|0.039996|225|244|25|45|GeneID:2622118)		vs_rs21285(N/A|-7.09319|0.1773928|201|208|40|47|GeneID:7138662)	vpa1496(N/A|-7.80040|0.3233651|128|141|35|46|GeneID:1192192)	vibhar_rs19000(N/A|-15.08750|0.00391494|285|299|39|53|GeneID:5558674)	prolyl endopeptidase		2
										0.851241	0.0393329	n646_rs15585(N/A|-7.48031|0.3689501|208|231|29|53|N/A)	ix91_rs18205(N/A|-5.83928|0.3391954|149|159|82|92|GeneID:23446734)	vv_rs17940(N/A|-11.08880|0.05542601|166|195|20|53|GeneID:2621214)	jv59_rs24700(N/A|-9.02722|0.0486655|173|192|11|29|N/A)	vs_rs21760(N/A|-7.87461|0.1109514|81|114|39|70|GeneID:7138766)	vpa1419(N/A|-5.95594|0.6194787|214|231|29|45|GeneID:1192115)	vibhar_rs19420(N/A|-7.38349|0.3853287|214|231|29|45|GeneID:5557413)	oxidoreductase		0
										0.851241	0.0394358	n646_rs09565(N/A|-9.55660|0.1350927|64|93|37|67|N/A)	ix91_rs14040(N/A|-3.12400|0.8467938|244|256|54|66|GeneID:23445901)	vv_rs14995(N/A|-10.98320|0.05900912|244|256|35|47|GeneID:2625960)	jv59_rs14280(N/A|-6.28016|0.2740939|86|96|53|63|N/A)	vs_rs01130(N/A|-6.31586|0.2704134|64|93|37|68|GeneID:7159905)	vp2843(N/A|-12.06400|0.03551564|244|256|35|47|GeneID:1190406)	vibhar_rs00650(N/A|-12.55150|0.02381430|244|256|35|47|GeneID:5555011)	fumarate reductase subunit D		0
										0.851241	0.0394607	n646_rs00045(N/A|-9.58022|0.1333519|110|161|26|74|N/A)	ix91_rs09765(N/A|-7.30906|0.1510419|149|157|56|64|GeneID:23445046)	vv_rs05680(N/A|-9.65794|0.1244333|122|132|37|47|GeneID:2623919)	jv59_rs10195(N/A|-7.38056|0.1462518|190|200|43|53|N/A)	vs_rs10225(N/A|-7.05692|0.1811046|213|221|36|44|GeneID:7161727)	vp0937(N/A|-7.96542|0.3016647|106|147|37|74|GeneID:1188435)	vibhar_rs06800(N/A|-7.43810|0.3770023|214|220|37|43|GeneID:5553234)	1-acyl-sn-glycerol-3-phosphate acyltransferase		0
										0.851241	0.0398359	n646_rs02270(N/A|-10.97330|0.05875028|266|285|26|46|N/A)	ix91_rs19885(N/A|-8.17548|0.08658749|184|214|80|113|GeneID:23447070)	vv_rs09155(N/A|-8.77002|0.1961283|182|218|20|63|GeneID:2624699)	jv59_rs08495(N/A|-4.78725|0.5409117|183|217|25|61|N/A)	vs_rs18960(N/A|-6.46263|0.2506418|187|200|6|24|GeneID:7138175)	vp1373(N/A|-8.79279|0.2080875|123|138|37|52|GeneID:1188880)	vibhar_rs06955(N/A|-11.30090|0.05228739|231|272|30|75|GeneID:5552916)	acetyltransferase		0
										0.851241	0.03985	n646_rs20555(N/A|-9.77516|0.1196697|208|215|37|44|N/A)			jv59_rs06735(N/A|-6.86905|0.1981521|222|235|53|65|N/A)	vs_rs10030(N/A|-7.58837|0.1324266|211|236|37|66|GeneID:7161692)	vpa0765(N/A|-9.25776|0.1663167|208|215|37|44|GeneID:1191455)		glutamate synthase		3
										0.852949	0.0401518		ix91_rs02935(N/A|-5.05353|0.481864|16|49|53|88|GeneID:23443680)	vv_rs12695(N/A|-13.55550|0.01127103|2|30|32|63|GeneID:2625472)	jv59_rs12295(N/A|-8.26861|0.08261192|10|32|2|21|N/A)	vs_rs11515(N/A|-6.45825|0.2512168|246|254|8|16|GeneID:7161984)	vp2423(N/A|-7.38661|0.3820570|57|85|26|52|GeneID:1189936)				2
										0.860622	0.0410248	n646_rs15485(malG|-9.54595|0.1358837|255|265|42|52|N/A)	ix91_rs21335(malG|-7.21421|0.1599863|18|24|58|64|GeneID:23447360)	vv_rs17715(malG|-12.99570|0.01654011|259|284|26|48|GeneID:2621286)	jv59_rs17715(malG|-5.26223|0.4465763|255|265|62|72|N/A)	vs_rs15855(malG|-6.91916|0.1957481|18|24|40|46|GeneID:7137533)	vpa1399(malG|-6.67013|0.496227|6|20|22|35|GeneID:1192095)	vibhar_rs19550(malG|-7.30814|0.3969815|17|23|40|46|GeneID:5557302)	maltose transporter permease		0
										0.860622	0.0411741	n646_rs22845(N/A|-9.04002|0.1779505|128|141|1|15|N/A)	ix91_rs21925(N/A|-7.20674|0.1607081|233|240|58|65|GeneID:23447478)	vv_rs20990(N/A|-10.98790|0.0588454|182|208|40|72|GeneID:2621982)	jv59_rs17235(N/A|-6.64598|0.2248066|87|109|63|84|N/A)	vs_rs16510(N/A|-7.47934|0.1414451|98|104|39|45|GeneID:7137670)	vpa0528(N/A|-4.53468|0.8447091|156|163|9|16|GeneID:1191216)	vibhar_rs24110(N/A|-9.25993|0.1633071|207|235|39|72|GeneID:5558672)	2-keto-4-pentenoate hydratase		0
										0.860622	0.041368	n646_rs01275(N/A|-7.98687|0.2964998|152|199|7|66|N/A)	ix91_rs08260(N/A|-8.17256|0.08675792|58|81|1|20|GeneID:23444745)	vv_rs07150(N/A|-10.09870|0.0979142|279|298|25|47|GeneID:2624237)	jv59_rs06020(N/A|-6.18332|0.2883139|142|163|40|63|N/A)	vs_rs08640(N/A|-7.34754|0.1529974|118|125|40|47|GeneID:7161409)	vp1227(N/A|-8.06554|0.2889888|151|185|26|68|GeneID:1188732)	vibhar_rs12400(N/A|-7.97707|0.3005859|152|185|26|66|GeneID:5553776)	AttH protein		0
										0.860622	0.0414083	n646_rs22640(N/A|-7.75574|0.3283601|137|176|25|59|N/A)	ix91_rs20765(N/A|-3.63910|0.7615571|293|299|10|16|GeneID:23447246)	vv_rs18315(N/A|-7.39697|0.3641096|183|193|42|53|GeneID:2621185)	jv59_rs18220(N/A|-11.94740|0.004429681|154|164|53|63|N/A)	vs_rs16910(N/A|-8.24495|0.08751342|69|77|41|49|GeneID:7137752)	vpa0566(N/A|-5.97266|0.616565|15|21|40|46|GeneID:1191254)	vibhar_rs20405(N/A|-12.32300|0.02762939|1|30|29|53|GeneID:5556539)	alcohol dehydrogenase		0
										0.869952	0.0420835	n646_rs06235(N/A|-6.69706|0.4975962|141|159|23|44|N/A)	ix91_rs04450(N/A|-6.37649|0.2578026|231|239|56|64|GeneID:23443983)	vv_rs11585(N/A|-6.57722|0.4962699|36|75|6|54|GeneID:2625239)	jv59_rs11025(N/A|-6.00737|0.3153964|10|32|53|71|N/A)	vs_rs04155(N/A|-15.44270|8.973951e-05|147|195|21|63|GeneID:7160492)	vp2198(N/A|-5.67871|0.6675031|2|8|35|41|GeneID:1189711)	vibhar_rs14505(N/A|-4.86773|0.8088235|11|17|35|41|GeneID:5553701)	Derived by automated computational analysis using gene prediction method: Protein Homology.		0
										0.883793	0.0432991	n646_rs10785(N/A|-9.96263|0.1076205|181|232|26|73|N/A)	ix91_rs15045(N/A|-6.18494|0.2851514|69|84|56|72|GeneID:23446102)	vv_rs15760(N/A|-8.27357|0.2484829|40|68|41|65|GeneID:2626124)	jv59_rs15330(N/A|-4.58357|0.5826704|190|205|71|85|N/A)		vp3066(N/A|-10.57650|0.08363671|162|195|20|55|GeneID:1190665)	vibhar_rs01955(N/A|-6.09508|0.6036419|265|279|1|14|GeneID:5554235)	amino acid ABC transporter permease		1
										0.883793	0.0433171	n646_rs18180(N/A|-9.11765|0.1709045|261|275|28|45|N/A)	ix91_rs19770(N/A|-3.88480|0.715678|161|168|57|64|GeneID:23447047)	vv_rs17245(N/A|-6.11978|0.5765086|252|265|41|55|GeneID:2621425)		vs_rs15755(N/A|-10.00740|0.02491376|56|63|41|48|GeneID:7137512)	vpa0226(N/A|-13.54700|0.01396063|264|284|22|45|GeneID:1190914)	vibhar_rs18025(N/A|-7.60232|0.3525891|258|275|22|45|GeneID:5558322)	thermolabile hemolysin		1
										0.883793	0.0436153	n646_rs12545(N/A|-7.95747|0.3004374|133|145|39|53|N/A)	ix91_rs01950(N/A|-5.30694|0.4332749|254|260|55|61|GeneID:23443483)	vv_rs02570(N/A|-7.82080|0.3045294|140|163|42|74|GeneID:2623244)	jv59_rs01215(N/A|-6.16704|0.2907525|74|93|53|74|N/A)	vs_rs01695(N/A|-11.42430|0.007723842|240|279|29|72|GeneID:7160006)	vp0335(apaG|-7.91893|0.307677|181|225|25|74|GeneID:1187802)	vibhar_rs03815(N/A|-7.03009|0.4415258|132|144|39|53|GeneID:5556066)	Co2+/Mg2+ efflux protein ApaG		0
										0.883793	0.0437907	n646_rs11125(N/A|-14.48580|0.004572494|201|211|37|47|N/A)	ix91_rs14655(N/A|-7.05926|0.1754901|201|209|58|66|GeneID:23446024)	vv_rs00535(N/A|-4.67590|0.818239|282|293|42|55|GeneID:2622805)	jv59_rs15730(N/A|-9.48611|0.0347055|201|209|59|67|N/A)	vs_rs00340(N/A|-5.14086|0.4637351|291|297|41|47|GeneID:7159752)	vp0050(N/A|-10.01390|0.1131355|201|209|39|47|GeneID:1187517)	vibhar_rs02325(N/A|-14.08750|0.008269141|201|211|37|47|GeneID:5552880)	ABC transporter permease		0
										0.883793	0.0440581		ix91_rs02995(N/A|-9.58861|0.03115152|10|43|35|63|GeneID:23443692)	vv_rs12635(N/A|-7.85408|0.3001386|122|130|37|45|GeneID:2625459)	jv59_rs12250(N/A|-5.40379|0.4198061|10|20|53|64|N/A)	vs_rs11455(N/A|-5.77876|0.3514928|89|95|40|46|GeneID:7161972)	vp2410(N/A|-8.81029|0.2063792|209|244|28|69|GeneID:1189923)				2
										0.883793	0.0445788	n646_rs02325(N/A|-10.30510|0.08820999|59|88|25|49|N/A)	ix91_rs08520(N/A|-6.24246|0.2767415|268|297|84|116|GeneID:23444797)	vv_rs09875(N/A|-8.33696|0.2412729|199|227|37|63|GeneID:2624865)		vs_rs20470(N/A|-5.75204|0.3558712|153|186|32|71|GeneID:7138495)	vp1422(N/A|-9.59708|0.1403384|186|215|37|63|GeneID:1188929)	vibhar_rs11905(N/A|-7.83468|0.3197208|185|227|25|63|GeneID:5555902)	SM-20		1
										0.883793	0.0447495	n646_rs18250(N/A|-8.99639|0.1820083|157|181|51|74|N/A)	ix91_rs20665(N/A|-6.18612|0.2849772|211|217|52|58|GeneID:23447226)	vv_rs18110(N/A|-9.41971|0.1411203|64|104|26|71|GeneID:2621249)	jv59_rs18320(N/A|-8.85729|0.05496682|80|90|54|64|N/A)	vs_rs16690(N/A|-9.44606|0.03803524|66|72|39|45|GeneID:7137707)	vpa0244(N/A|-8.87017|0.2006163|8|20|60|72|GeneID:1190933)	vibhar_rs18100(N/A|-3.29231|0.9649628|242|248|40|46|GeneID:5558307)	FAD-dependent oxidoreductase		0
										0.883793	0.0450402	n646_rs10050(N/A|-7.76094|0.3276208|17|33|60|75|N/A)	ix91_rs03645(N/A|-7.30102|0.1517843|259|265|56|62|GeneID:23443822)	vv_rs04105(N/A|-10.12170|0.09667424|1|35|29|69|GeneID:2623578)		vs_rs07765(N/A|-6.70674|0.2200561|245|252|36|43|GeneID:7161231)			Derived by automated computational analysis using gene prediction method: Protein Homology.		3
										0.883793	0.0450597	n646_rs22485(N/A|-9.52894|0.1371547|158|202|3|49|N/A)	ix91_rs17630(N/A|-3.19958|0.835399|101|107|40|46|GeneID:23446619)	vv_rs18545(N/A|-12.37210|0.02496711|170|214|25|71|GeneID:2621130)	jv59_rs20385(N/A|-5.87684|0.3365079|14|38|43|62|N/A)		vpa0596(N/A|-9.42386|0.1531473|112|135|25|45|GeneID:1191284)		chemotaxis protein		2
										0.883793	0.0452346	n646_rs02845(N/A|-9.76932|0.1200622|264|290|26|59|N/A)	ix91_rs07415(N/A|-7.46870|0.1368915|190|200|6|16|GeneID:23444576)	vv_rs08300(N/A|-7.15669|0.400753|264|285|34|59|GeneID:2624485)	jv59_rs06920(N/A|-6.05006|0.308679|188|200|6|18|N/A)	vs_rs06875(N/A|-7.18822|0.1679467|218|240|35|58|GeneID:7161039)	vp1536(N/A|-10.97500|0.06702388|264|290|26|59|GeneID:1189043)	vibhar_rs10775(N/A|-9.84758|0.1199625|264|285|34|59|GeneID:5556503)	fumarate/nitrate reduction transcriptional regulator		0
										0.883793	0.0460442	n646_rs00350(N/A|-8.44471|0.239596|212|219|39|46|N/A)	ix91_rs05675(N/A|-6.44004|0.2491452|213|221|56|64|GeneID:23444228)	vv_rs11135(N/A|-8.81280|0.1920498|75|86|8|19|GeneID:2625137)	jv59_rs04560(N/A|-2.86439|0.8903411|43|49|40|46|N/A)	vs_rs04975(N/A|-9.38735|0.03970615|195|233|26|71|GeneID:7160658)	vp1006(N/A|-11.28960|0.05603795|186|219|39|75|GeneID:1188510)	vibhar_rs07330(N/A|-10.41680|0.08761673|193|233|29|73|GeneID:5555312)	membrane protein		0
										0.883793	0.0461711	n646_rs19105(N/A|-6.83762|0.4733328|267|287|26|45|N/A)			jv59_rs18050(N/A|-7.12037|0.1710992|272|284|54|65|N/A)	vs_rs10065(N/A|-5.92348|0.3283293|31|37|39|45|GeneID:7161701)	vpa1252(N/A|-7.88655|0.3119116|257|265|63|71|GeneID:1191948)	vibhar_rs19940(N/A|-12.09630|0.03194869|283|299|1|26|GeneID:5556918)	Derived by automated computational analysis using gene prediction method: Protein Homology.		2
										0.883793	0.04636	n646_rs21500(N/A|-10.16130|0.09596827|134|150|37|53|N/A)	ix91_rs20240(N/A|-3.73201|0.744528|91|110|1|19|GeneID:23447141)	vv_rs20080(N/A|-10.33450|0.08582754|195|221|26|53|GeneID:2621779)	jv59_rs18885(N/A|-4.58093|0.5832136|278|284|61|67|N/A)	vs_rs17965(N/A|-7.81548|0.1151355|40|47|65|72|GeneID:7137966)	vpa0983(N/A|-12.30300|0.03071836|135|151|37|53|GeneID:1191672)	vibhar_rs21555(N/A|-9.52403|0.1424633|140|150|37|47|GeneID:5557750)	Derived by automated computational analysis using gene prediction method: Protein Homology.		0
										0.883793	0.0463758	n646_rs08710(tldD|-10.21420|0.09305014|157|202|34|73|N/A)	ix91_rs13085(tldD|-6.59111|0.2293963|78|84|56|62|GeneID:23445710)	vv_rs14070(tldD|-10.64090|0.07206592|4|28|26|53|GeneID:2625769)	jv59_rs00795(tldD|-3.84159|0.7322001|202|209|67|74|N/A)	vs_rs01600(tldD|-6.53930|0.2407269|132|148|37|55|GeneID:7159986)	vp2684(N/A|-10.12680|0.1065887|157|202|34|73|GeneID:1190229)	vibhar_rs17220(tldD|-10.58370|0.07968642|157|202|34|73|GeneID:5555357)	protease TldD		0
										0.883793	0.0467036		ix91_rs18140(N/A|-9.95568|0.02333361|94|105|61|72|GeneID:23446721)	vv_rs21885(N/A|-8.25449|0.2506836|149|170|25|43|GeneID:2622184)	jv59_rs21040(N/A|-4.92587|0.5128126|265|271|40|46|N/A)	vs_rs18770(N/A|-7.29036|0.1582368|80|86|37|43|GeneID:7138136)					3
										0.883793	0.0467276	n646_rs20955(N/A|-9.39032|0.1478740|191|231|28|75|N/A)	ix91_rs19405(N/A|-8.92363|0.0512912|124|159|52|89|GeneID:23446974)	vv_rs19290(N/A|-5.77305|0.6381754|106|143|32|65|GeneID:2622591)	jv59_rs19510(N/A|-7.77064|0.1145552|161|183|59|84|N/A)		vpa0855(N/A|-8.57851|0.2298992|35|48|31|45|GeneID:1191544)	vibhar_rs22540(N/A|-9.84226|0.1203069|223|237|28|44|GeneID:5558540)	bifunctional metallophosphatase/5'-nucleotidase		1
										0.883793	0.0467368	n646_rs20385(N/A|-10.02120|0.1040690|179|209|39|71|N/A)				vs_rs20400(N/A|-6.14500|0.2947361|178|209|39|72|GeneID:7138479)	vpa0691(N/A|-10.05280|0.1108421|201|209|39|47|GeneID:1191380)	vibhar_rs23310(N/A|-10.36800|0.09006039|201|209|39|47|GeneID:5556817)	riboflavin-specific deaminase		3
										0.883793	0.0469168	n646_rs16150(fliI|-10.92510|0.06054694|191|230|32|74|N/A)			jv59_rs03595(fliI|-5.87078|0.3375087|56|62|40|46|N/A)		vpa1533(N/A|-7.64668|0.3444692|200|231|31|62|GeneID:1192229)	vibhar_rs18495(fliI|-11.43980|0.04806891|205|231|31|55|GeneID:5558850)	ATP synthase		3
										0.883793	0.0471854	n646_rs00230(N/A|-8.26759|0.2606210|57|78|38|55|N/A)	ix91_rs09440(N/A|-6.35388|0.2609328|8|37|56|85|GeneID:23444981)	vv_rs11270(N/A|-7.88790|0.2957203|158|198|6|45|GeneID:2625166)	jv59_rs09715(N/A|-6.29353|0.2721692|78|94|48|65|N/A)	vs_rs09680(N/A|-8.34882|0.0817416|238|248|37|47|GeneID:7161619)	vp0980(N/A|-9.92727|0.1183883|70|88|26|46|GeneID:1188484)	vibhar_rs07215(N/A|-8.86779|0.1987062|71|78|38|45|GeneID:5553563)	ATP-binding protein		0
										0.883793	0.0473501	n646_rs13215(N/A|-13.53480|0.009838704|155|181|26|53|N/A)	ix91_rs02545(N/A|-3.30336|0.8190854|76|83|54|61|GeneID:23443602)	vv_rs03430(N/A|-10.69740|0.06975042|52|82|34|66|GeneID:2623430)	jv59_rs01790(N/A|-6.46290|0.2485984|214|220|40|46|N/A)	vs_rs02340(N/A|-8.21083|0.0894827|162|170|37|45|GeneID:7160139)	vp0506(N/A|-6.54827|0.5168554|127|144|34|53|GeneID:1187974)	vibhar_rs04515(N/A|-7.25642|0.4050873|74|111|21|53|GeneID:5553789)	SAM-dependent methyltransferase		0
										0.883928	0.0478386	n646_rs00630(N/A|-8.25810|0.2617827|165|181|37|53|N/A)		vv_rs10835(N/A|-6.09175|0.5814927|278|285|42|49|GeneID:2625074)			vp1067(N/A|-6.63767|0.5016958|3|18|61|74|GeneID:1188571)	vibhar_rs07615(N/A|-7.20675|0.4129518|168|184|37|53|GeneID:5553428)	Derived by automated computational analysis using gene prediction method: Protein Homology.		3
										0.883928	0.0480096	n646_rs06415(N/A|-7.73252|0.331674|144|187|25|66|N/A)	ix91_rs04590(N/A|-6.62122|0.2255995|13|19|58|64|GeneID:23444011)	vv_rs11755(N/A|-12.95740|0.01697164|122|162|28|68|GeneID:2625274)	jv59_rs10895(N/A|-6.63812|0.2257923|24|30|59|65|N/A)	vs_rs03880(N/A|-6.46706|0.2500612|25|32|40|47|GeneID:7160436)	vp2234(flhF|-7.52567|0.3616708|144|187|25|66|GeneID:1189747)	vibhar_rs14685(N/A|-7.22053|0.4107623|145|167|42|66|GeneID:5554210)	flagellar biosynthesis regulator FlhF		0
										0.883928	0.0480781		ix91_rs17660(N/A|-6.08203|0.3006177|194|200|58|64|GeneID:23446625)	vv_rs18575(N/A|-15.28020|0.003162933|109|151|20|63|GeneID:2621136)	jv59_rs08960(N/A|-9.27436|0.04063304|279|291|53|65|N/A)	vs_rs19805(N/A|-5.77013|0.3529035|201|207|41|47|GeneID:7138352)		vibhar_rs08880(N/A|-5.08976|0.7752203|25|60|40|71|GeneID:5553494)			2
										0.883928	0.048277		ix91_rs00640(N/A|-10.83720|0.0111771|39|51|52|63|GeneID:23443221)	vv_rs01755(N/A|-9.40110|0.1424984|242|248|40|46|GeneID:2623070)		vs_rs01050(N/A|-4.84512|0.5201272|248|272|48|75|GeneID:7162764)	vp0229(N/A|-7.08963|0.42767|191|241|27|73|GeneID:1187696)				3
										0.885936	0.0486171	n646_rs00580(N/A|-8.64542|0.217275|239|253|30|44|N/A)	ix91_rs05425(N/A|-5.69556|0.3633737|31|40|13|22|GeneID:23444178)	vv_rs10885(N/A|-12.99050|0.01659811|143|222|1|58|GeneID:2625085)	jv59_rs04375(N/A|-4.48707|0.6025362|72|80|50|58|N/A)	vs_rs05205(N/A|-6.26694|0.2772343|188|194|39|45|GeneID:7160705)	vp1057(N/A|-8.52150|0.2359841|239|249|34|44|GeneID:1188561)	vibhar_rs07565(N/A|-10.43270|0.08683298|145|175|25|54|GeneID:5553283)	Tol-Pal system subunit TolQ		0
										0.894163	0.0496656	n646_rs05955(N/A|-9.95641|0.1080035|171|222|29|74|N/A)	ix91_rs10425(N/A|-7.47358|0.1364764|287|297|55|65|GeneID:23445178)	vv_rs05900(N/A|-11.33590|0.04778371|189|237|8|64|GeneID:2623970)	jv59_rs03910(N/A|-7.37937|0.1463585|194|222|57|88|N/A)	vs_rs04430(N/A|-5.64465|0.3737783|158|215|4|60|GeneID:7160549)	vp2124(N/A|-7.73508|0.3322292|178|222|29|71|GeneID:1189636)	vibhar_rs14095(N/A|-6.82870|0.4751389|287|297|36|46|GeneID:5553456)	aspartate-semialdehyde dehydrogenase		0
										0.894163	0.0497608	n646_rs20075(N/A|-10.96220|0.0591599|161|207|4|52|N/A)	ix91_rs18425(N/A|-8.57278|0.0658903|264|270|56|62|GeneID:23446778)	vv_rs18225(N/A|-11.17960|0.05250037|154|208|3|53|GeneID:2621167)	jv59_rs20290(N/A|-4.01341|0.6987208|190|208|3|21|N/A)	vs_rs15085(N/A|-6.35468|0.2650828|215|221|64|70|GeneID:7137372)	vpa1111(N/A|-7.32030|0.3920032|180|207|4|32|GeneID:1191807)	vibhar_rs23640(N/A|-8.55373|0.2311361|168|207|4|45|GeneID:5558184)	glycine/betaine ABC transporter substrate-binding protein		0
										0.894163	0.049933	n646_rs17835(N/A|-9.57813|0.1335052|111|160|25|71|N/A)				vs_rs18030(N/A|-5.61123|0.37945|178|186|68|76|GeneID:7137979)	vpa0157(N/A|-10.03700|0.1117688|126|159|25|58|GeneID:1190844)	vibhar_rs26025(N/A|-11.96070|0.03481274|114|160|25|71|GeneID:5558012)	Derived by automated computational analysis using gene prediction method: Protein Homology.		3
										0.894163	0.0499987	n646_rs06265(N/A|-9.43677|0.1442097|3|41|30|65|N/A)	ix91_rs04580(N/A|-3.06681|0.8551336|224|230|98|104|GeneID:23444009)	vv_rs11615(N/A|-10.64720|0.07180445|23|80|25|75|GeneID:2625245)	jv59_rs10905(N/A|-4.75100|0.5483119|271|277|20|26|N/A)	vs_rs04020(N/A|-8.23885|0.08786279|126|132|39|45|GeneID:7160465)	vp2205(N/A|-10.84880|0.0719395|11|57|20|59|GeneID:1189718)	vibhar_rs14540(N/A|-10.26110|0.09561888|11|57|20|59|GeneID:5553726)	phosphohistidine phosphatase SixA		0

## Sheet: CopraRNA-150-150
fdr	p-value	NC_022359	NZ_CP009355	NC_005139	NZ_CP009265	NC_011744	NC_004603	NC_009784	Annotation	Additional homologs	Amount sampled
0.140922	0.00029313	dddddd	ix91_rs08925(N/A|-7.99720|0.09920339|57|66|52|61|GeneID:23444878)	vv_rs09715(N/A|-14.52440|0.005479514|104|115|34|45|GeneID:2624830)	jv59_rs09290(N/A|-13.57580|0.0006747992|49|74|61|85|N/A)	vs_rs08345(N/A|-5.12675|0.4737171|60|95|34|68|GeneID:7161351)	vp1440(N/A|-12.00900|0.03557667|96|138|20|53|GeneID:1188947)	vibhar_rs11830(N/A|-13.70000|0.01178617|94|138|20|55|GeneID:5554923)	dddddd	dddddd	1
0.470003	0.00722965	dddddd	ix91_rs10310(N/A|-5.87944|0.3366640|289|295|60|66|GeneID:23445155)	vv_rs05540(N/A|-9.21634|0.1608728|281|295|41|55|GeneID:2623890)	jv59_rs10675(N/A|-9.53943|0.03183617|289|295|61|67|N/A)	vs_rs04065(N/A|-7.90794|0.1143054|289|295|41|47|GeneID:7160475)	dddddd	dddddd	dddddd	dddddd	3
0.475846	0.0079184	dddddd	ix91_rs21565(N/A|-8.66245|0.06283901|115|126|52|63|GeneID:23447406)	vv_rs18810(N/A|-12.36620|0.02542782|123|142|42|59|GeneID:2621074)	jv59_rs24345(N/A|-5.89434|0.3325142|277|283|59|65|N/A)	vs_rs14885(N/A|-10.04250|0.0262267|117|123|39|45|GeneID:7137329)	vp2137(N/A|-9.15800|0.1716641|29|44|42|58|GeneID:1189650)	dddddd	dddddd	dddddd	2
0.579171	0.0108425	dddddd	ix91_rs03090(N/A|-8.82451|0.0559437|226|237|52|64|GeneID:23443711)	vv_rs12575(N/A|-12.09770|0.03029265|121|152|10|46|GeneID:2625447)	jv59_rs12165(N/A|-5.40828|0.4180654|138|151|12|26|N/A)	dddddd	vp2400(N/A|-8.83805|0.2003669|105|129|42|66|GeneID:1189913)	vibhar_rs15570(N/A|-13.62760|0.01238000|202|234|37|72|GeneID:5552953)	dddddd	dddddd	2
0.591802	0.0120022	dddddd	ix91_rs04955(N/A|-6.58820|0.2332322|29|41|52|63|GeneID:23444084)	vv_rs12040(N/A|-14.37020|0.006164046|147|173|25|51|GeneID:2625331)	dddddd	vs_rs21825(N/A|-11.34020|0.00914347|151|170|28|47|GeneID:7138779)	vp1416(N/A|-9.30733|0.1594429|276|295|24|43|GeneID:1188923)	dddddd	dddddd	dddddd	3
0.607344	0.0131025	dddddd	ix91_rs02980(N/A|-4.43180|0.609683|42|50|6|14|GeneID:23443689)	vv_rs12650(N/A|-8.83403|0.1947699|11|44|28|65|GeneID:2625462)	jv59_rs12265(N/A|-8.10764|0.09012738|139|150|10|21|N/A)	vs_rs11470(N/A|-10.82860|0.01407055|256|264|39|47|GeneID:7161975)	vp2413(N/A|-9.22987|0.1656914|107|119|14|26|GeneID:1189926)	dddddd	dddddd	dddddd	2
0.616588	0.0144287	dddddd	ix91_rs02935(N/A|-5.00846|0.4945016|71|78|39|46|GeneID:23443680)	vv_rs12700(N/A|-12.76550|0.01947794|136|165|32|64|GeneID:2625473)	jv59_rs12300(N/A|-6.96407|0.1859115|189|210|2|20|N/A)	vs_rs11515(N/A|-7.96448|0.1103734|196|210|2|16|GeneID:7161984)	vp2423(N/A|-8.73389|0.2104784|7|35|26|52|GeneID:1189936)	dddddd	dddddd	dddddd	2
0.644441	0.0167561	dddddd	ix91_rs20020(N/A|-6.65181|0.2251827|255|267|56|67|GeneID:23447097)	dddddd	jv59_rs18470(N/A|-4.82522|0.5323673|2|21|55|73|N/A)	vs_rs20355(N/A|-5.38617|0.4266369|129|137|41|49|GeneID:7138469)	vpa0609(N/A|-13.44710|0.01424683|136|180|26|68|GeneID:1191298)	dddddd	dddddd	dddddd	3
0.633448	0.0151527	n646_rs00070(N/A|-11.77760|0.03751012|124|156|42|74|N/A)	ix91_rs11455(N/A|-8.56094|0.06751713|116|134|52|71|GeneID:23445384)	vv_rs05700(N/A|-8.47748|0.2311116|274|295|29|51|GeneID:2623925)	jv59_rs02710(N/A|-7.68469|0.1191589|183|193|1|11|N/A)	vs_rs10175(N/A|-8.86779|0.06126304|224|232|41|49|GeneID:7161724)	vp0940(N/A|-8.49288|0.2353674|124|179|26|74|GeneID:1188444)	vibhar_rs06835(N/A|-6.86053|0.4637205|154|172|34|50|GeneID:5555609)	MexH family multidrug efflux RND transporter periplasmic adaptor subunit	dddddd	0
0.280658	0.00204327	n646_rs00470(N/A|-12.35900|0.02584618|135|188|7|65|N/A)	ix91_rs05195(N/A|-5.23492|0.450867|1|7|61|67|GeneID:23444132)	vv_rs11010(N/A|-11.31090|0.04964525|139|178|21|63|GeneID:2625110)	jv59_rs04150(N/A|-4.49300|0.6004483|151|157|61|67|N/A)	vs_rs05090(N/A|-11.15960|0.01067221|142|175|25|62|GeneID:7160683)	vp1032(N/A|-13.64950|0.0124434|136|178|21|65|GeneID:1188536)	vibhar_rs07450(N/A|-12.74830|0.02211571|136|178|21|65|GeneID:5553398)	DNA-binding response regulator	dddddd	0
0.382758	0.0049643	n646_rs00610(N/A|-12.08270|0.03090337|151|166|31|47|N/A)	ix91_rs05455(N/A|-8.97908|0.04998163|151|157|60|66|GeneID:23444184)	vv_rs10855(N/A|-10.22910|0.09351103|151|158|40|47|GeneID:2625079)	jv59_rs04405(N/A|-8.37967|0.07479739|151|158|60|67|N/A)	vs_rs05235(N/A|-7.28218|0.1658993|151|158|40|47|GeneID:7160711)	vp1063(N/A|-10.73310|0.07495263|129|166|31|75|GeneID:1188567)	vibhar_rs07595(N/A|-9.49729|0.1451983|151|158|40|47|GeneID:5553188)	quinolinate synthetase	dddddd	0
0.475917	0.00804332	n646_rs01135(N/A|-11.58690|0.04225829|176|193|25|42|N/A)	ix91_rs05955(N/A|-8.30818|0.08046649|140|148|56|64|GeneID:23444284)	vv_rs07015(N/A|-12.66770|0.02080651|176|193|25|42|GeneID:2624207)	jv59_rs04835(N/A|-3.19347|0.8431948|34|40|40|46|N/A)	vs_rs09270(N/A|-9.89903|0.02923986|269|277|39|47|GeneID:7161534)	vp1186(N/A|-10.57480|0.08184806|176|193|25|42|GeneID:1188691)	vibhar_rs12605(N/A|-7.96790|0.2993859|138|151|32|45|GeneID:5555569)	RNA pseudouridine synthase	dddddd	0
0.267701	0.00167052	n646_rs01285(N/A|-13.01600|0.01668889|51|99|29|72|N/A)	ix91_rs05635(N/A|-7.77015|0.1150556|60|70|53|64|GeneID:23444220)	vv_rs07160(N/A|-11.95490|0.0332036|50|100|29|74|GeneID:2624239)	jv59_rs04520(N/A|-5.86037|0.3381355|60|71|53|65|N/A)	vs_rs08615(N/A|-8.24212|0.09264774|21|28|65|72|GeneID:7161404)	vp1229(N/A|-9.33198|0.1574951|74|99|29|50|GeneID:1188734)	vibhar_rs12360(N/A|-16.01310|0.00217244|52|103|24|71|GeneID:5554119)	TetR family transcriptional regulator	dddddd	0
0.607344	0.0131936	n646_rs01510(N/A|-6.69461|0.4980375|1|8|25|32|N/A)	ix91_rs06675(N/A|-8.32095|0.07976545|144|156|61|72|GeneID:23444428)	vv_rs09360(N/A|-8.79445|0.1985741|59|74|40|55|GeneID:2624754)	jv59_rs08345(N/A|-12.78040|0.001649205|151|161|57|67|N/A)	vs_rs05720(N/A|-8.55874|0.07539816|269|279|39|49|GeneID:7160805)	vp1277(N/A|-8.93806|0.1910173|119|148|25|55|GeneID:1188782)	vibhar_rs09735(N/A|-6.66262|0.4968686|268|274|41|47|GeneID:5554319)	histidine utilization repressor	dddddd	0
0.609694	0.0138483	n646_rs01905(N/A|-7.84969|0.3148758|19|38|31|55|N/A)	dddddd	dddddd	jv59_rs08530(N/A|-6.65926|0.2216354|186|192|57|63|N/A)	vs_rs07505(N/A|-7.93737|0.1122447|149|157|41|49|GeneID:7161178)	dddddd	vibhar_rs24470(N/A|-9.16991|0.1712363|128|179|13|71|GeneID:5557639)	histone acetyltransferase	dddddd	3
0.296357	0.00240724	n646_rs02780(N/A|-15.35740|0.00301475|146|169|37|66|N/A)	ix91_rs07485(N/A|-4.51219|0.5935049|149|163|68|82|GeneID:23444590)	vv_rs08360(N/A|-7.85815|0.3055917|163|169|37|43|GeneID:2624498)	jv59_rs06855(N/A|-8.04484|0.09402012|145|169|57|87|N/A)	vs_rs06940(N/A|-8.55367|0.07565134|151|159|39|47|GeneID:7161053)	vp1523(N/A|-13.28860|0.01582153|210|232|37|65|GeneID:1189030)	dddddd	ammonium transporter	dddddd	1
0.0710396	7.38841e-05	n646_rs02885(N/A|-10.76770|0.06933492|151|159|39|47|N/A)	ix91_rs07375(N/A|-10.93540|0.01020199|151|159|58|66|GeneID:23444568)	vv_rs08260(N/A|-11.09340|0.05662801|157|165|39|47|GeneID:2624477)	jv59_rs06960(N/A|-10.70890|0.01216526|151|159|59|67|N/A)	vs_rs06835(N/A|-12.38000|0.003548827|151|159|39|47|GeneID:7161031)	vp1544(N/A|-10.60600|0.08044698|157|165|39|47|GeneID:1189051)	vibhar_rs10815(N/A|-10.25390|0.09735506|151|159|39|47|GeneID:5555990)	cytochrome c oxidase cbb3-type subunit I	dddddd	0
0.607344	0.0128757	n646_rs03150(N/A|-11.82560|0.03639308|150|176|34|62|N/A)	ix91_rs07155(N/A|-7.28462|0.1558941|139|168|62|92|GeneID:23444524)	vv_rs07700(N/A|-10.14560|0.09797359|149|202|8|59|GeneID:2624356)	jv59_rs07630(N/A|-4.99079|0.4989707|31|37|40|46|N/A)	vs_rs06555(N/A|-7.67422|0.1317924|17|39|37|60|GeneID:7160970)	vp1627(N/A|-13.94330|0.01019348|150|208|1|62|GeneID:1189134)	vibhar_rs11120(N/A|-9.27836|0.162222|149|200|10|63|GeneID:5555888)	acylphosphatase	dddddd	0
0.334739	0.00356847	n646_rs03415(N/A|-9.89685|0.1137789|126|168|30|69|N/A)	ix91_rs07075(N/A|-8.79331|0.05721838|130|156|61|85|GeneID:23444508)	vv_rs07615(N/A|-8.16458|0.2669245|18|35|26|43|GeneID:2624337)	jv59_rs07700(N/A|-10.06860|0.02087102|124|156|62|92|N/A)	vs_rs06315(N/A|-8.77688|0.06516437|61|67|39|45|GeneID:7160922)	vp1646(N/A|-21.64450|9.405964e-06|130|168|30|65|GeneID:1189153)	vibhar_rs11245(N/A|-5.33775|0.725819|146|152|38|44|GeneID:5556058)	Fe/S-dependent 2-methylisocitrate dehydratase AcnD	dddddd	0
0.280658	0.00202007	n646_rs03630(N/A|-9.74526|0.1235967|234|278|20|66|N/A)	ix91_rs09080(N/A|-6.12815|0.2975246|283|299|60|74|GeneID:23444909)	dddddd	jv59_rs07135(N/A|-8.27864|0.08020977|52|63|54|65|N/A)	dddddd	vp1690(N/A|-13.87990|0.01064498|250|281|20|53|GeneID:1189197)	vibhar_rs08000(N/A|-9.68244|0.1319755|118|135|37|55|GeneID:5554982)	EscJ/YscJ/HrcJ family type III secretion inner membrane ring protein	dddddd	2
0.30756	0.00295885	n646_rs04550(N/A|-15.78280|0.002147752|5|33|35|65|N/A)	ix91_rs08645(N/A|-3.65362|0.7599186|118|132|70|87|GeneID:23444822)	vv_rs09970(N/A|-15.17750|0.003277841|5|27|35|59|GeneID:2624884)	jv59_rs08880(N/A|-6.44074|0.2501941|176|183|57|64|N/A)	vs_rs08390(N/A|-7.46192|0.1494888|160|168|64|72|GeneID:7161361)	vp1872(N/A|-14.27560|0.008099747|6|34|35|65|GeneID:1189379)	vibhar_rs08980(N/A|-9.54124|0.1419644|11|33|35|59|GeneID:5555204)	membrane protein	dddddd	0
0.261145	0.00139448	n646_rs04750(N/A|-15.90940|0.001937994|138|192|25|74|N/A)	ix91_rs08595(N/A|-9.19425|0.04259718|147|179|56|86|GeneID:23444812)	vv_rs10165(N/A|-11.11990|0.05573367|150|180|36|62|GeneID:2624925)	jv59_rs08825(N/A|-3.71958|0.7540012|147|160|72|87|N/A)	vs_rs09015(N/A|-5.50067|0.406537|284|291|62|69|GeneID:7161485)	vp1920(N/A|-19.94960|6.449619e-05|165|211|32|74|GeneID:1189427)	vibhar_rs12720(N/A|-18.85800|0.0001834897|138|192|25|74|GeneID:5555223)	peptidase	dddddd	0
0.527614	0.00932859	n646_rs04790(N/A|-10.65520|0.07405263|140|156|42|59|N/A)	ix91_rs04235(N/A|-9.75837|0.02754455|145|156|61|72|GeneID:23443940)	vv_rs06315(N/A|-10.66500|0.07292384|139|154|11|25|GeneID:2624055)	jv59_rs11230(N/A|-8.28006|0.08013145|139|154|11|25|N/A)	vs_rs09055(N/A|-6.85711|0.2102485|139|154|11|25|GeneID:7161494)	vp1928(N/A|-7.41881|0.372143|108|114|39|45|GeneID:1189435)	vibhar_rs12760(N/A|-9.90504|0.1174233|247|255|37|45|GeneID:5555031)	cytochrome c nitrite reductase pentaheme subunit	dddddd	0
0.261145	0.00137916	n646_rs04895(sirA|-10.72500|0.07109355|220|251|39|72|N/A)	ix91_rs06145(sirA|-9.04417|0.04763958|45|84|54|89|GeneID:23444322)	vv_rs06205(sirA|-11.90740|0.03422552|227|252|38|63|GeneID:2624033)	jv59_rs04960(sirA|-10.10330|0.02028608|121|129|57|65|N/A)	vs_rs09160(sirA|-8.04640|0.1048743|122|128|39|45|GeneID:7161513)	vp1945(N/A|-9.39922|0.1522800|226|244|43|64|GeneID:1189456)	vibhar_rs12865(sirA|-10.88590|0.06843944|226|251|39|64|GeneID:5555734)	DNA-binding response regulator	dddddd	0
0.0394835	2.05322e-05	n646_rs04930(N/A|-12.11360|0.03029653|151|181|21|47|N/A)	ix91_rs08820(N/A|-9.53654|0.03279237|151|162|55|66|GeneID:23444857)	vv_rs06165(N/A|-13.81530|0.00931456|151|181|21|47|GeneID:2624024)	jv59_rs09080(N/A|-9.10679|0.04427927|151|162|56|67|N/A)	vs_rs09195(N/A|-10.56100|0.01748373|151|159|39|47|GeneID:7161520)	vp1953(N/A|-14.90570|0.005169452|151|181|21|47|GeneID:1189464)	vibhar_rs12900(N/A|-14.53250|0.006592806|151|181|21|47|GeneID:5555921)	threonylcarbamoyl-AMP synthase	dddddd	0
0.470003	0.00757675	n646_rs04935(N/A|-8.55105|0.2280237|148|173|28|50|N/A)	ix91_rs08825(N/A|-9.78392|0.02699007|47|76|60|86|GeneID:23444858)	vv_rs06160(N/A|-7.43831|0.3642018|140|155|43|55|GeneID:2624023)	jv59_rs09085(N/A|-7.75214|0.1140693|61|76|61|76|N/A)	vs_rs09200(N/A|-8.83707|0.0625584|123|175|26|77|GeneID:7161521)	vp1954(N/A|-12.10610|0.03352915|48|63|41|56|GeneID:1189465)	vibhar_rs12905(N/A|-11.28730|0.05426194|49|64|41|56|GeneID:5556014)	phosphatase	dddddd	0
0.470003	0.00680941	n646_rs05015(N/A|-12.72980|0.02023608|141|184|14|59|N/A)	ix91_rs06090(N/A|-6.57614|0.2347813|140|156|61|79|GeneID:23444311)	vv_rs06105(N/A|-13.01020|0.01648062|129|159|39|71|GeneID:2624012)	jv59_rs04890(N/A|-5.88028|0.3348340|128|156|62|89|N/A)	vs_rs05375(N/A|-6.22475|0.2914716|107|115|65|73|GeneID:23366082)	vp1971(N/A|-14.40660|0.007388339|132|159|39|75|GeneID:1189482)	vibhar_rs12970(N/A|-10.27880|0.09604244|130|157|41|70|GeneID:5554562)	acyl-CoA thioesterase	dddddd	0
0.347377	0.00388383	n646_rs05085(N/A|-12.67480|0.02099149|22|46|25|63|N/A)	ix91_rs05615(N/A|-6.94843|0.1903048|55|67|52|64|GeneID:23444216)	dddddd	jv59_rs04495(N/A|-5.60162|0.3827652|244|259|59|73|N/A)	vs_rs05320(N/A|-15.12240|0.0001594951|127|172|28|73|GeneID:7160722)	vp1983(N/A|-5.30175|0.7237488|244|258|40|53|GeneID:1189494)	vibhar_rs13075(N/A|-7.21845|0.4062736|244|259|39|53|GeneID:5556350)	Derived by automated computational analysis using gene prediction method: Protein Homology.	dddddd	1
0.609694	0.0141089	n646_rs05485(N/A|-9.05969|0.1772547|117|151|25|72|N/A)	ix91_rs09545(N/A|-5.25683|0.4467248|1|17|1|18|GeneID:23445002)	vv_rs10180(N/A|-10.70690|0.07116846|117|151|25|72|GeneID:2624929)	jv59_rs09810(N/A|-8.28464|0.0798793|52|78|35|61|N/A)	vs_rs04675(N/A|-9.11898|0.05150613|116|125|1|10|GeneID:7160598)	vp2072(nhaB|-9.23726|0.1650868|117|150|26|72|GeneID:1189583)	vibhar_rs13685(N/A|-8.30215|0.2583513|117|170|21|72|GeneID:5555000)	Na+/H+ antiporter NhaB	dddddd	0
0.208322	0.000920818	n646_rs05530(N/A|-15.93610|0.001896232|128|174|29|70|N/A)	ix91_rs09570(N/A|-6.32225|0.2690982|162|171|54|63|GeneID:23445007)	vv_rs10225(N/A|-10.05650|0.1029330|131|159|38|68|GeneID:2624938)	jv59_rs09835(N/A|-7.30022|0.1518299|21|37|58|74|N/A)	vs_rs04640(N/A|-7.31337|0.1629549|149|156|42|49|GeneID:7160591)	vp2081(N/A|-15.02040|0.004754598|128|174|29|70|GeneID:1189592)	vibhar_rs13730(N/A|-17.50710|0.0006318154|128|174|29|70|GeneID:5555195)	Derived by automated computational analysis using gene prediction method: Protein Homology.	dddddd	0
0.298759	0.00279649	n646_rs05590(moaC|-10.41020|0.0853084|147|172|25|53|N/A)	ix91_rs10655(moaC|-2.76924|0.8935824|62|69|13|20|GeneID:23445224)	vv_rs06050(moaC|-15.16200|0.00331904|151|172|25|47|GeneID:2624000)	jv59_rs03650(moaC|-9.19386|0.04147982|143|161|57|75|N/A)	vs_rs04580(moaC|-9.92288|0.02871890|151|163|35|47|GeneID:7160579)	vp2094(moaC|-10.05130|0.1087040|147|179|26|53|GeneID:1189605)	vibhar_rs13785(moaC|-9.54264|0.1418624|147|172|25|53|GeneID:5556172)	cyclic pyranopterin monophosphate synthase accessory protein	dddddd	0
0.607344	0.0132649	n646_rs06135(N/A|-12.90680|0.01796952|25|73|29|72|N/A)	ix91_rs04760(N/A|-8.69940|0.06120617|163|180|54|72|GeneID:23444045)	vv_rs11500(N/A|-6.69995|0.4810845|163|174|42|53|GeneID:2625218)	jv59_rs10725(N/A|-11.22810|0.007660574|163|180|55|73|N/A)	vs_rs04255(N/A|-7.60839|0.1370898|254|262|39|47|GeneID:7160513)	vp2178(N/A|-9.23388|0.1653631|49|67|35|52|GeneID:1189691)	vibhar_rs14395(N/A|-7.53278|0.3590465|163|174|42|53|GeneID:5553384)	Derived by automated computational analysis using gene prediction method: Protein Homology.	dddddd	0
0.14416	0.000449798	n646_rs06145(N/A|-13.80630|0.009628119|124|136|35|47|N/A)	ix91_rs04750(N/A|-9.88097|0.02497189|131|140|54|63|GeneID:23444043)	vv_rs11510(N/A|-14.64760|0.004982832|124|136|35|47|GeneID:2625220)	jv59_rs10735(N/A|-9.71169|0.02781137|130|139|55|64|N/A)	vs_rs04245(N/A|-4.86366|0.5231921|222|241|51|72|GeneID:7160511)	vp2180(N/A|-14.20360|0.008516844|124|136|35|47|GeneID:1189693)	vibhar_rs14405(N/A|-14.05900|0.00920728|126|136|35|45|GeneID:5553621)	adenine phosphoribosyltransferase	dddddd	0
0.179284	0.000699237	n646_rs06205(N/A|-12.99850|0.01688837|132|157|41|67|N/A)	ix91_rs04475(N/A|-9.40737|0.03623308|127|159|58|91|GeneID:23443988)	vv_rs11565(N/A|-7.61720|0.3384548|151|159|39|47|GeneID:2625235)	jv59_rs11000(N/A|-8.02229|0.09545192|151|157|61|67|N/A)	vs_rs04180(N/A|-10.99230|0.01228607|151|159|39|47|GeneID:7160498)	vp2192(N/A|-13.14800|0.01734893|129|159|39|72|GeneID:1189705)	vibhar_rs14475(N/A|-12.42850|0.02710666|132|157|41|67|GeneID:5553734)	aspartate-semialdehyde dehydrogenase	dddddd	0
0.582018	0.0110471	n646_rs06240(N/A|-7.91715|0.3056593|109|121|42|53|N/A)	ix91_rs04435(N/A|-13.46840|0.0007430369|238|250|52|64|GeneID:23443980)	vv_rs11590(N/A|-12.20400|0.02827551|236|260|23|47|GeneID:2625240)	jv59_rs11040(N/A|-9.13195|0.04345389|151|169|50|67|N/A)	vs_rs04150(N/A|-4.41014|0.6105337|7|21|53|67|GeneID:7160491)	vp2199(N/A|-8.53902|0.2304394|236|249|34|47|GeneID:1189712)	vibhar_rs14510(N/A|-10.24190|0.09799312|236|260|23|47|GeneID:5553536)	Derived by automated computational analysis using gene prediction method: Protein Homology.	dddddd	0
0.179284	0.000695593	n646_rs06390(N/A|-12.26630|0.02745265|144|158|40|55|N/A)	ix91_rs04615(N/A|-9.22789|0.04153253|137|158|59|86|GeneID:23444016)	vv_rs11730(N/A|-11.85980|0.03527749|144|158|40|55|GeneID:2625269)	jv59_rs10870(N/A|-8.29472|0.0793267|141|158|60|79|N/A)	vs_rs03905(N/A|-8.25937|0.09162962|149|158|40|49|GeneID:7160441)	vp2229(N/A|-12.61060|0.02449877|144|165|35|55|GeneID:1189742)	vibhar_rs14660(N/A|-11.90140|0.03758376|144|158|40|55|GeneID:5554175)	chemotaxis protein CheA	dddddd	0
0.0629699	4.91185e-05	n646_rs06395(N/A|-17.73780|0.0003955135|138|166|42|74|N/A)	ix91_rs04610(N/A|-4.89234|0.517363|144|154|77|87|GeneID:23444015)	vv_rs11735(N/A|-15.84140|0.001892397|138|166|42|74|GeneID:2625270)	jv59_rs10875(N/A|-8.58052|0.06495735|144|166|62|88|N/A)	dddddd	vp2230(N/A|-17.22690|0.0008371065|138|154|58|74|GeneID:1189743)	vibhar_rs14665(N/A|-17.81640|0.0004812551|138|166|42|74|GeneID:5554189)	protein phosphatase	dddddd	1
0.609694	0.0140957	n646_rs06440(N/A|-7.78951|0.3232502|48|55|37|44|N/A)	ix91_rs04385(N/A|-3.04322|0.8581157|159|165|57|63|GeneID:23443970)	vv_rs11780(N/A|-9.29159|0.1547899|149|163|42|59|GeneID:2625279)	jv59_rs11085(N/A|-4.20003|0.6603273|84|90|59|65|N/A)	vs_rs03855(N/A|-14.21750|0.0005003475|251|277|40|67|GeneID:7160431)	vp2239(fliP|-8.88228|0.1961889|120|162|10|43|GeneID:1189752)	vibhar_rs14710(N/A|-12.54790|0.02513515|48|59|33|44|GeneID:5554264)	flagellar biosynthetic protein FliP	dddddd	0
0.0856656	0.000133644	n646_rs06455(N/A|-13.57120|0.01137150|144|166|31|55|N/A)	ix91_rs04370(N/A|-7.85398|0.1089769|144|164|52|74|GeneID:23443967)	vv_rs11795(N/A|-12.88070|0.01801086|135|166|31|68|GeneID:2625282)	jv59_rs11100(N/A|-8.15753|0.08713241|151|164|53|67|N/A)	vs_rs03840(N/A|-9.86579|0.02997972|135|166|31|69|GeneID:7160428)	vp2242(fliM|-13.75800|0.01156462|144|166|31|55|GeneID:1189755)	vibhar_rs14725(N/A|-13.45350|0.01392119|144|166|31|55|GeneID:5553979)	flagellar motor switch protein FliM	dddddd	0
0.607344	0.0131252	n646_rs06940(N/A|-7.27030|0.4012326|2|15|56|69|N/A)	ix91_rs11535(N/A|-10.42920|0.01586714|163|171|56|64|GeneID:23445400)	vv_rs12275(N/A|-9.10498|0.1702237|6|36|29|69|GeneID:2625379)	jv59_rs02630(N/A|-6.23883|0.2788074|163|171|57|65|N/A)	vs_rs11120(N/A|-9.56810|0.0373695|280|289|66|75|GeneID:7161905)	vp2332(N/A|-9.73586|0.1282571|151|171|37|57|GeneID:1189845)	vibhar_rs15190(N/A|-8.39897|0.2472553|163|171|37|45|GeneID:5556452)	tRNA (N6-threonylcarbamoyladenosine(37)-N6)-methyltransferase TrmO	dddddd	0
0.140922	0.000289058	n646_rs07360(N/A|-10.65550|0.07403968|150|157|41|48|N/A)	ix91_rs11990(N/A|-9.56027|0.03219223|150|157|60|67|GeneID:23445491)	vv_rs12775(N/A|-10.47040|0.08157468|150|157|41|48|GeneID:2625488)	jv59_rs02180(N/A|-9.42801|0.03470435|150|157|61|68|N/A)	vs_rs11590(N/A|-11.83040|0.005925537|150|157|41|48|GeneID:7162001)	vp2437(N/A|-10.63150|0.07931739|150|157|41|48|GeneID:1189950)	vibhar_rs15785(N/A|-10.65820|0.07785033|150|157|41|48|GeneID:5553153)	nucleoside transporter NupC	dddddd	0
0.23965	0.00112161	n646_rs07665(N/A|-10.19300|0.09650025|47|75|39|63|N/A)	ix91_rs02345(N/A|-8.44932|0.07299945|67|123|11|64|GeneID:23443562)	vv_rs13115(N/A|-11.06890|0.05746598|45|73|39|63|GeneID:2625563)	jv59_rs01590(N/A|-7.76862|0.1128534|68|74|59|65|N/A)	vs_rs11880(N/A|-8.71645|0.06787331|65|71|39|45|GeneID:7162056)	vp2495(N/A|-13.25180|0.01620904|39|75|39|66|GeneID:1190010)	vibhar_rs16090(N/A|-13.46090|0.01385228|37|73|39|66|GeneID:5556149)	aconitate hydratase B	dddddd	0
0.261145	0.0015004	n646_rs08055(N/A|-16.80060|0.0009163887|130|175|25|65|N/A)	ix91_rs12545(N/A|-10.19640|0.0192956|151|164|54|66|GeneID:23445602)	vv_rs13510(N/A|-6.72525|0.4768425|137|164|35|65|GeneID:2625646)	jv59_rs12855(N/A|-10.59260|0.01345118|151|166|53|67|N/A)	vs_rs12330(N/A|-6.04818|0.3174486|151|157|41|47|GeneID:7162135)	vp2569(N/A|-14.18630|0.008619939|115|166|33|72|GeneID:1190093)	vibhar_rs16540(N/A|-15.03550|0.004573909|141|164|35|55|GeneID:5554000)	pyridoxine 5'-phosphate synthase	dddddd	0
0.640078	0.0155591	n646_rs08105(N/A|-12.92050|0.01780409|170|215|6|47|N/A)	ix91_rs12595(N/A|-6.55457|0.2375702|26|32|58|64|GeneID:23445612)	vv_rs13560(N/A|-8.35696|0.2444668|7|39|23|65|GeneID:2625657)	jv59_rs12905(N/A|-12.09000|0.003367026|204|215|53|64|N/A)	vs_rs12380(N/A|-6.98589|0.1959656|171|183|55|67|GeneID:7162146)	vp2580(N/A|-8.14825|0.2746556|170|215|6|61|GeneID:1190104)	vibhar_rs16590(N/A|-7.45948|0.3697643|22|43|26|55|GeneID:5553528)	L-aspartate oxidase	dddddd	0
0.579171	0.0107808	n646_rs08510(N/A|-10.62610|0.07531779|189|199|35|45|N/A)	ix91_rs12960(N/A|-5.43814|0.413076|59|72|58|73|GeneID:23445685)	vv_rs13975(N/A|-9.86352|0.1144028|267|296|27|59|GeneID:2625748)	jv59_rs13215(N/A|-8.81965|0.05471019|189|197|57|65|N/A)	vs_rs12820(N/A|-8.00966|0.1073119|189|195|39|45|GeneID:7162217)	vp2643(N/A|-9.72781|0.1287924|229|248|24|47|GeneID:1190188)	vibhar_rs17015(N/A|-10.63080|0.0790556|189|199|35|45|GeneID:5556185)	LPS export ABC transporter permease LptF	dddddd	0
0.579171	0.010578	n646_rs09035(N/A|-9.57992|0.1351080|143|160|37|55|N/A)	ix91_rs13430(N/A|-9.92067|0.02418520|53|64|52|64|GeneID:23445779)	vv_rs14370(N/A|-4.84210|0.7941982|61|89|20|46|GeneID:2625832)	dddddd	dddddd	vp2739(N/A|-6.55608|0.5092138|34|54|34|53|GeneID:1190289)	vibhar_rs00100(N/A|-6.77738|0.477543|43|54|34|46|GeneID:5554397)	primosomal replication protein N	dddddd	2
0.146273	0.000494423	n646_rs09215(N/A|-13.91810|0.008887981|136|161|37|65|N/A)	ix91_rs13485(N/A|-9.12299|0.04493069|128|162|54|87|GeneID:23445790)	vv_rs14625(N/A|-13.12920|0.01517847|138|161|37|59|GeneID:2625883)	jv59_rs00450(N/A|-10.83110|0.01093314|133|161|57|84|N/A)	vs_rs13340(N/A|-5.84264|0.3494353|137|145|6|14|GeneID:7162324)	vp2775(N/A|-14.67420|0.006109183|136|161|37|65|GeneID:1190325)	vibhar_rs00280(N/A|-11.65140|0.04372129|138|162|35|59|GeneID:5553936)	sulfurtransferase	dddddd	0
0.594668	0.012215	n646_rs09255(N/A|-9.02463|0.1804391|239|269|41|71|N/A)	ix91_rs01100(N/A|-8.71498|0.06052861|47|53|58|64|GeneID:23443313)	vv_rs14665(N/A|-11.79840|0.03667675|62|150|6|101|GeneID:2625891)	jv59_rs13890(N/A|-8.21401|0.08384364|226|243|57|73|N/A)	vs_rs13380(N/A|-6.12277|0.3063025|103|109|39|45|GeneID:7162332)	vp2784(N/A|-12.55390|0.02539057|232|249|37|53|GeneID:1190334)	vibhar_rs00320(N/A|-7.79695|0.3219984|92|112|21|41|GeneID:5555202)	DNA-binding protein	dddddd	0
0.644441	0.0166073	n646_rs09320(N/A|-8.41620|0.2431807|128|165|26|65|N/A)	ix91_rs01035(N/A|-5.86221|0.3394852|136|143|55|62|GeneID:23443300)	vv_rs14730(N/A|-17.59290|0.0003813404|117|165|26|72|GeneID:2625904)	jv59_rs13955(N/A|-10.15310|0.01947197|117|150|35|74|N/A)	vs_rs13455(N/A|-4.94844|0.5070974|118|138|50|74|GeneID:7162347)	vp2798(N/A|-7.08885|0.4221915|154|165|26|37|GeneID:1190348)	vibhar_rs00385(N/A|-7.55254|0.3561891|128|165|26|65|GeneID:5555484)	glutamine amidotransferase	dddddd	0
0.334739	0.00353897	n646_rs09385(N/A|-12.04840|0.03158979|266|297|39|68|N/A)	ix91_rs13525(N/A|-7.22102|0.1620011|161|167|60|66|GeneID:23445798)	vv_rs14800(N/A|-10.89100|0.063882|270|297|39|63|GeneID:2625918)	jv59_rs00410(N/A|-7.25402|0.1561971|161|167|61|67|N/A)	vs_rs01260(N/A|-7.88963|0.1156031|161|167|41|47|GeneID:7159923)	vp2815(N/A|-12.04840|0.03473271|266|297|39|68|GeneID:1190365)	vibhar_rs00445(N/A|-11.61560|0.04466987|266|297|39|68|GeneID:5555725)	protease modulator HflK	dddddd	0
0.640381	0.015914	n646_rs09565(N/A|-10.59090|0.07687339|185|214|29|53|N/A)	ix91_rs14040(N/A|-3.89315|0.7156811|206|220|4|20|GeneID:23445901)	vv_rs14995(N/A|-11.01020|0.05951789|194|206|35|47|GeneID:2625960)	jv59_rs14280(N/A|-6.79752|0.2048459|36|46|53|63|N/A)	vs_rs01130(N/A|-7.11902|0.1819810|14|43|37|68|GeneID:7159905)	vp2843(N/A|-11.77120|0.04107221|194|206|35|47|GeneID:1190406)	vibhar_rs00650(N/A|-13.16710|0.01684025|194|206|35|47|GeneID:5555011)	fumarate reductase subunit D	dddddd	0
0.296357	0.00246579	n646_rs09660(N/A|-8.87395|0.1946462|117|157|40|66|N/A)	ix91_rs00990(N/A|-8.33279|0.07912006|126|162|56|92|GeneID:23443291)	vv_rs15085(N/A|-13.71250|0.01003689|118|177|26|66|GeneID:2625979)	jv59_rs14020(N/A|-12.35990|0.002563279|130|150|53|74|N/A)	vs_rs13740(N/A|-6.61097|0.2396583|280|287|37|44|GeneID:7162406)	vp2864(N/A|-8.77047|0.2068835|140|157|40|59|GeneID:1190427)	vibhar_rs00755(N/A|-9.64018|0.1349018|280|294|26|44|GeneID:5555193)	C4-dicarboxylate ABC transporter	dddddd	0
0.475846	0.00783646	n646_rs09880(N/A|-5.94370|0.6332128|260|267|26|33|N/A)	ix91_rs00820(N/A|-12.31860|0.002684886|215|228|52|64|GeneID:23443257)	vv_rs15230(N/A|-9.99353|0.1065643|247|270|23|45|GeneID:2626009)	jv59_rs14190(N/A|-9.96915|0.02263103|188|233|28|73|N/A)	vs_rs13920(N/A|-9.73508|0.03305021|51|59|39|47|GeneID:7162441)	vp2915(N/A|-5.23587|0.7344671|218|224|39|45|GeneID:1190490)	vibhar_rs01035(N/A|-8.06181|0.2874299|250|270|23|43|GeneID:5553886)	IclR family transcriptional regulator	dddddd	0
0.396593	0.00525904	n646_rs09895(N/A|-6.64112|0.5074532|49|85|7|47|N/A)	ix91_rs13680(N/A|-13.10110|0.001142885|71|85|7|21|GeneID:23445829)	vv_rs15255(N/A|-13.01070|0.01647495|12|64|12|65|GeneID:2626016)	jv59_rs00280(N/A|-14.54660|0.0002000827|69|84|7|22|N/A)	vs_rs13935(N/A|-3.65877|0.7504899|23|39|26|43|GeneID:7162444)	vp2920(N/A|-12.21050|0.03144631|30|85|7|74|GeneID:1190495)	vibhar_rs01060(N/A|-8.07412|0.2858874|43|85|7|43|GeneID:5555660)	regulator of sigma D	dddddd	0
0.470003	0.00752286	n646_rs10415(N/A|-9.72106|0.1252283|137|161|25|51|N/A)	ix91_rs14520(N/A|-13.40200|0.0008044141|52|70|6|24|GeneID:23445997)	vv_rs15405(N/A|-9.66179|0.1275144|150|158|40|48|GeneID:2626049)	jv59_rs15895(N/A|-9.03421|0.04673727|150|158|60|68|N/A)	vs_rs14375(N/A|-5.64955|0.3811118|151|157|41|47|GeneID:7162521)	vp2996(N/A|-9.81001|0.1234137|137|161|25|51|GeneID:1190588)	vibhar_rs01555(N/A|-9.67108|0.1327568|137|161|25|51|GeneID:5555867)	ferredoxin	dddddd	0
0.261145	0.00156171	n646_rs10445(N/A|-14.37120|0.006390499|150|170|26|48|N/A)	ix91_rs14550(N/A|-8.24947|0.08375654|150|159|58|67|GeneID:23446003)	vv_rs15435(N/A|-6.71550|0.4784757|20|26|37|43|GeneID:2626055)	jv59_rs15865(N/A|-9.13317|0.04341421|150|159|59|68|N/A)	vs_rs14405(N/A|-8.94182|0.05823535|150|159|39|48|GeneID:7162527)	vp3003(N/A|-14.06610|0.009368255|150|170|26|48|GeneID:1190595)	vibhar_rs01585(N/A|-13.68240|0.01192809|150|170|26|48|GeneID:5555860)	guanosine-5'-triphosphate 3'-diphosphate pyrophosphatase	dddddd	0
0.401266	0.00560603	n646_rs10810(N/A|-10.54350|0.07901244|64|83|26|45|N/A)	ix91_rs15070(N/A|-7.34825|0.1499666|64|70|58|64|GeneID:23446107)	vv_rs15785(N/A|-12.45060|0.02404975|54|83|26|55|GeneID:2626129)	jv59_rs15305(N/A|-7.74200|0.1148228|64|70|59|65|N/A)	vs_rs14755(N/A|-7.28168|0.1659468|64|70|39|45|GeneID:7162592)	vp3071(N/A|-10.22930|0.09883155|94|113|26|45|GeneID:1190670)	vibhar_rs01980(N/A|-10.18370|0.1011389|64|83|26|45|GeneID:5553627)	ATP synthase subunit alpha	dddddd	0
0.298759	0.00267972	n646_rs10970(N/A|-11.57760|0.04250304|211|234|20|45|N/A)	ix91_rs00060(N/A|-8.51356|0.06979999|211|218|57|64|GeneID:23443105)	vv_rs00380(N/A|-14.11600|0.0074627|211|234|20|45|GeneID:2622772)	jv59_rs15165(N/A|-4.55559|0.587578|187|197|11|22|N/A)	vs_rs00175(N/A|-7.25790|0.1682199|211|217|39|45|GeneID:7159733)	vp0025(N/A|-11.64130|0.04438416|211|234|20|45|GeneID:1187481)	vibhar_rs02125(N/A|-13.64730|0.01221578|211|234|20|45|GeneID:5553214)	sulfurtransferase TusA	dddddd	0
0.14315	0.000409426	n646_rs11395(tatA|-16.00780|0.001788137|139|186|26|75|N/A)	ix91_rs14805(tatA|-5.92820|0.3287558|17|29|61|72|GeneID:23446054)	vv_rs01215(tatA|-16.65450|0.0009267365|139|186|26|75|GeneID:2622947)	jv59_rs15585(tatA|-5.15691|0.4661169|2|15|60|73|N/A)	vs_rs00455(tatA|-5.52113|0.402994|33|40|41|48|GeneID:7159776)	vp0098(tatA|-17.95590|0.0004438691|139|186|26|75|GeneID:1187565)	vibhar_rs02645(tatA|-18.39950|0.0002831700|139|186|26|75|GeneID:5554778)	protein translocase TatA	dddddd	0
0.298759	0.00279121	n646_rs11425(N/A|-10.36660|0.08746015|130|161|1|29|N/A)	ix91_rs14785(N/A|-5.84331|0.3425959|256|268|52|64|GeneID:23446050)	vv_rs01235(N/A|-18.19620|0.0002067130|103|166|1|55|GeneID:2622952)	jv59_rs15605(N/A|-7.84500|0.1073571|40|51|62|73|N/A)	vs_rs00475(N/A|-6.34262|0.2749245|140|160|1|21|GeneID:7159780)	vp0104(N/A|-11.21880|0.05686216|3|50|26|75|GeneID:1187571)	vibhar_rs02665(N/A|-9.27012|0.1628931|116|161|1|34|GeneID:5554747)	delta-aminolevulinic acid dehydratase	dddddd	0
0.14315	0.000387307	n646_rs11460(N/A|-10.59120|0.07686001|136|172|40|74|N/A)	ix91_rs14750(N/A|-11.86290|0.004263154|151|172|59|80|GeneID:23446043)	vv_rs01265(N/A|-13.52840|0.01145771|149|172|40|63|GeneID:2622959)	jv59_rs15640(N/A|-8.25145|0.08172194|20|26|59|65|N/A)	vs_rs00515(N/A|-10.09430|0.02520771|19|25|39|45|GeneID:7159788)	vp0114(N/A|-11.19450|0.0576661|151|172|40|61|GeneID:1187581)	vibhar_rs02700(N/A|-7.42174|0.3753544|33|39|39|45|GeneID:5554542)	coproporphyrinogen III oxidase	dddddd	0
0.0285909	7.43393e-06	n646_rs11640(N/A|-12.40720|0.02504493|151|169|29|47|N/A)	ix91_rs00425(N/A|-11.37330|0.006830395|146|165|52|72|GeneID:23443178)	vv_rs01440(N/A|-16.96400|0.000697053|151|172|26|47|GeneID:2623001)	jv59_rs14805(N/A|-11.72660|0.004803614|151|165|53|67|N/A)	vs_rs00690(N/A|-8.40075|0.08363241|151|158|40|47|GeneID:7159826)	vp0150(N/A|-12.42560|0.02751762|151|169|29|47|GeneID:1187617)	vibhar_rs02890(N/A|-13.95240|0.009913298|129|169|29|65|GeneID:5554721)	RNA-binding transcriptional accessory protein	dddddd	0
0.382758	0.00472952	n646_rs12275(rpmJ|-9.15551|0.1687804|235|241|39|45|N/A)	ix91_rs01250(rpmJ|-8.97601|0.0500945|235|241|58|64|GeneID:23443343)	vv_rs02205(rpmJ|-8.98013|0.1812134|235|241|39|45|GeneID:23638864)	jv59_rs13740(rpmJ|-8.89450|0.05180443|235|241|59|65|N/A)	vs_rs13200(rpmJ|-10.10380|0.02502465|233|241|39|47|GeneID:7162297)	vp0278(rpmJ|-9.15551|0.1718741|235|241|39|45|GeneID:1187745)	vibhar_rs03540(rpmJ|-8.79885|0.2051419|235|241|39|45|GeneID:5555448)	50S ribosomal protein L36	dddddd	0
0.280658	0.00197403	n646_rs12295(N/A|-10.15860|0.09838413|226|240|40|55|N/A)	ix91_rs01270(N/A|-8.41349|0.07483725|226|240|59|74|GeneID:23443347)	vv_rs02225(N/A|-11.22890|0.05218368|226|240|40|55|GeneID:2623166)	jv59_rs13720(N/A|-8.41621|0.07291802|226|240|60|75|N/A)	vs_rs13180(N/A|-9.40096|0.04217674|234|240|40|46|GeneID:7162293)	vp0282(N/A|-10.15810|0.1026845|226|240|40|55|GeneID:1187749)	vibhar_rs03560(N/A|-10.16760|0.1020242|226|240|40|55|GeneID:5555485)	DNA-directed RNA polymerase subunit alpha	dddddd	0
0.470003	0.00722991	n646_rs12750(N/A|-8.14600|0.2757568|277|284|37|44|N/A)	ix91_rs02080(N/A|-7.89612|0.1060223|26|34|56|64|GeneID:23443509)	vv_rs02980(N/A|-9.97278|0.1077842|277|292|26|44|GeneID:2623334)	jv59_rs01325(N/A|-5.97190|0.3198948|276|289|53|65|N/A)	vs_rs01865(N/A|-10.40080|0.01985946|12|32|25|45|GeneID:7160038)	vp0409(N/A|-7.92673|0.3022292|275|284|37|46|GeneID:1187877)	vibhar_rs04040(N/A|-12.30580|0.02927709|275|285|36|46|GeneID:5555843)	2-succinyl-6-hydroxy-2 4-cyclohexadiene-1-carboxylate synthase	dddddd	0
0.532666	0.0095564	n646_rs13040(N/A|-9.75005|0.1232759|141|151|5|15|N/A)	ix91_rs12050(N/A|-10.40390|0.01621171|49|59|52|62|GeneID:23445503)	vv_rs03260(N/A|-8.14004|0.2698903|142|151|5|14|GeneID:2623393)	jv59_rs02120(N/A|-8.58772|0.06462628|49|59|53|63|N/A)	vs_rs02160(N/A|-7.68846|0.1306685|141|151|5|15|GeneID:7160096)	vp0470(N/A|-9.83652|0.1217198|141|151|5|15|GeneID:1187938)	vibhar_rs04325(N/A|-9.76367|0.1264993|141|151|5|15|GeneID:5554261)	carbamoyl-phosphate synthase small subunit	dddddd	0
0.470003	0.00726173	n646_rs13095(N/A|-10.24570|0.09367443|131|159|39|66|N/A)	ix91_rs12295(N/A|-7.54315|0.1329142|206|213|56|63|GeneID:23445552)	vv_rs03315(N/A|-8.55900|0.2223876|151|159|39|47|GeneID:2623407)	jv59_rs01880(N/A|-9.33383|0.03730304|151|159|59|67|N/A)	vs_rs02205(N/A|-11.11610|0.01107265|151|159|39|47|GeneID:7160105)	vp0481(gltD|-6.54820|0.5105458|279|286|37|44|GeneID:1187949)	vibhar_rs04380(N/A|-7.87444|0.3116135|138|157|41|59|GeneID:5554279)	glutamate synthase subunit beta	dddddd	0
0.591802	0.0118984	n646_rs13165(N/A|-11.98470|0.03290113|111|151|40|72|N/A)	ix91_rs12420(N/A|-7.67607|0.1222043|134|151|59|74|GeneID:23445577)	vv_rs03385(N/A|-9.17638|0.1641800|133|151|40|56|GeneID:2623421)	jv59_rs12715(N/A|-8.84835|0.05357976|130|151|60|79|N/A)	vs_rs02270(N/A|-6.06658|0.3146758|144|151|40|47|GeneID:7160118)	vp0496(N/A|-10.33340|0.09342149|111|151|40|72|GeneID:1187964)	vibhar_rs04455(N/A|-11.35560|0.05212779|111|151|40|72|GeneID:5553628)	threonine synthase	dddddd	0
0.498007	0.00854615	n646_rs13190(N/A|-4.61669|0.849704|189|200|2|12|N/A)	ix91_rs12015(N/A|-9.27771|0.03999816|268|276|56|64|GeneID:23445496)	vv_rs03405(N/A|-6.20055|0.566972|35|56|51|71|GeneID:2623425)	jv59_rs02155(N/A|-4.49096|0.6008677|201|216|59|73|N/A)	vs_rs02315(N/A|-16.23850|3.09948e-05|125|171|13|66|GeneID:7160134)	vp0501(N/A|-13.37210|0.01497328|21|29|37|45|GeneID:1187969)	vibhar_rs04480(N/A|-8.05232|0.2886230|222|241|42|63|GeneID:5553659)	cation-binding protein	dddddd	0
0.298759	0.00276859	n646_rs13470(N/A|-9.95515|0.1101832|7|17|37|46|N/A)	ix91_rs02785(N/A|-9.29501|0.03947696|8|18|56|65|GeneID:23443650)	vv_rs03670(N/A|-10.10360|0.1002856|7|17|37|46|GeneID:2623481)	jv59_rs12445(N/A|-7.37895|0.1446124|13|23|57|66|N/A)	vs_rs02585(N/A|-9.90590|0.02908895|6|12|40|46|GeneID:7160191)	vp0558(N/A|-10.03030|0.1099222|7|17|37|46|GeneID:1188026)	vibhar_rs04760(N/A|-10.03550|0.1095419|7|17|37|46|GeneID:5556274)	membrane protein	dddddd	0
0.470003	0.00746513	n646_rs13605(N/A|-17.09600|0.0007075004|112|157|4|45|N/A)	ix91_rs03315(N/A|-6.51249|0.2430785|228|253|58|83|GeneID:23443756)	vv_rs03815(N/A|-8.38424|0.2413958|198|213|37|52|GeneID:2623514)	jv59_rs11950(N/A|-6.34159|0.2639775|228|250|61|84|N/A)	dddddd	vp0578(N/A|-6.31799|0.549855|134|163|39|64|GeneID:1188053)	vibhar_rs04915(N/A|-9.52282|0.1433125|115|146|11|45|GeneID:5554086)	polyphosphate kinase 2	dddddd	1
0.14315	0.00036322	n646_rs13725(N/A|-12.77060|0.01969174|255|283|39|75|N/A)	ix91_rs02890(N/A|-10.38700|0.01644553|275|283|58|66|GeneID:23443671)	vv_rs03930(N/A|-10.37020|0.08636274|252|286|37|67|GeneID:2623538)	jv59_rs12345(N/A|-4.24369|0.6514765|219|241|53|73|N/A)	vs_rs02810(N/A|-11.41550|0.008565732|281|289|39|47|GeneID:7160233)	vp0602(N/A|-13.44210|0.01429425|255|283|39|75|GeneID:1188077)	vibhar_rs05035(N/A|-14.87140|0.005159804|261|283|39|63|GeneID:5554980)	Fe-S assembly protein IscX	dddddd	0
0.280658	0.00186605	n646_rs13770(N/A|-12.27770|0.02725034|18|42|32|55|N/A)	ix91_rs03450(N/A|-8.11519|0.09170725|18|40|52|74|GeneID:23443783)	vv_rs03975(N/A|-6.15890|0.5742566|125|150|6|32|GeneID:2623547)	jv59_rs11835(N/A|-10.24080|0.01810846|30|53|53|75|N/A)	vs_rs02855(N/A|-9.24397|0.04717155|38|57|25|45|GeneID:7160243)	vp0612(engA|-13.30110|0.01569183|18|42|32|55|GeneID:1188087)	vibhar_rs05085(N/A|-14.64560|0.006078495|4|41|25|55|GeneID:5555608)	ribosome biogenesis GTPase Der	dddddd	0
0.330091	0.00334726	n646_rs14045(N/A|-8.45831|0.2383694|101|107|37|43|N/A)	ix91_rs11785(N/A|-10.20010|0.01923639|100|108|56|64|GeneID:23445450)	dddddd	jv59_rs02385(N/A|-8.22697|0.08310399|104|110|57|63|N/A)	vs_rs11380(N/A|-7.13308|0.1805498|101|108|37|44|GeneID:7161958)	vp0672(N/A|-8.88090|0.1963182|63|108|37|71|GeneID:1188147)	vibhar_rs05490(N/A|-9.97592|0.1130837|99|107|37|45|GeneID:5553794)	adenine permease	dddddd	1
0.382758	0.004943	n646_rs14235(N/A|-7.92841|0.3041387|208|225|35|53|N/A)	ix91_rs11485(N/A|-6.91322|0.1942188|134|156|61|85|GeneID:23445390)	vv_rs04525(N/A|-13.70790|0.01007036|129|156|42|66|GeneID:2623673)	jv59_rs02685(N/A|-11.94860|0.003872395|132|156|62|88|N/A)	vs_rs11175(N/A|-6.72668|0.2254848|149|156|42|49|GeneID:7161916)	vp0710(N/A|-7.92989|0.3018232|208|225|35|53|GeneID:1188185)	vibhar_rs05700(N/A|-10.20240|0.1001188|58|81|25|45|GeneID:5555506)	PTS trehalose transporter subunit IIBC	dddddd	0
0.382758	0.00497605	n646_rs14255(N/A|-9.09522|0.1740735|5|21|25|41|N/A)	ix91_rs11445(N/A|-8.17194|0.08827344|109|130|52|72|GeneID:23445382)	vv_rs04535(N/A|-14.09460|0.007582566|231|278|2|52|GeneID:2623675)	jv59_rs02720(N/A|-11.06380|0.008890278|238|248|53|63|N/A)	vs_rs11155(N/A|-6.40404|0.2665571|281|288|39|46|GeneID:7161912)	vp0714(N/A|-7.89062|0.3068952|278|292|35|51|GeneID:1188189)	vibhar_rs05710(N/A|-8.69356|0.2156573|279|292|35|48|GeneID:5555424)	membrane protein	dddddd	0
0.320623	0.00316788	n646_rs14600(N/A|-12.75610|0.01988365|6|27|37|59|N/A)	ix91_rs11075(N/A|-6.34606|0.2657415|24|31|57|64|GeneID:23445308)	vv_rs04920(N/A|-13.49260|0.01175416|185|216|37|66|GeneID:2623761)	jv59_rs03120(N/A|-11.67680|0.005038181|10|33|57|81|N/A)	vs_rs03725(N/A|-7.86467|0.1173915|208|214|39|45|GeneID:7160405)	vp0782(flgH|-3.68307|0.9294356|222|233|51|63|GeneID:1188279)	vibhar_rs06110(N/A|-11.10950|0.06018506|4|27|37|61|GeneID:5553191)	flagellar basal body L-ring protein	dddddd	0
0.382758	0.0047543	n646_rs14830(N/A|-11.69070|0.03961099|129|182|1|53|N/A)	ix91_rs03950(N/A|-8.03324|0.09686164|111|165|68|113|GeneID:23443883)	vv_rs05120(N/A|-9.78353|0.1194608|129|171|10|53|GeneID:2623805)	jv59_rs11505(N/A|-8.27792|0.0802495|232|239|58|65|N/A)	vs_rs10605(N/A|-6.40426|0.2665274|160|171|10|20|GeneID:7161804)	vp0828(N/A|-12.84920|0.02104782|129|182|1|53|GeneID:1188325)	vibhar_rs06310(N/A|-13.21700|0.01629471|129|182|1|53|GeneID:5554355)	transcriptional regulator	dddddd	0
0.609694	0.0138137	n646_rs15090(N/A|-8.85877|0.1961250|123|157|41|74|N/A)	ix91_rs16265(N/A|-8.57721|0.06674799|104|157|60|111|GeneID:23446346)	vv_rs05400(N/A|-8.11085|0.2734477|252|288|8|42|GeneID:2623862)	dddddd	vs_rs03550(N/A|-7.57643|0.1397226|56|62|39|45|GeneID:7160370)	vp0881(N/A|-8.39268|0.2463381|123|168|26|74|GeneID:1188379)	dddddd	beta-ketoacyl-ACP synthase II	dddddd	2
0.633448	0.0149991	n646_rs15140(N/A|-10.32480|0.08956707|170|180|60|70|N/A)	ix91_rs16315(N/A|-4.51387|0.5931666|153|161|12|20|GeneID:23446356)	vv_rs05450(N/A|-12.02550|0.03173476|37|45|37|45|GeneID:2623872)	dddddd	vs_rs03600(N/A|-6.55055|0.2473062|43|63|25|45|GeneID:7160380)	vp0891(N/A|-12.26580|0.03039084|170|192|42|70|GeneID:1188389)	dddddd	(3R)-hydroxymyristoyl-ACP dehydratase	dddddd	2
0.347377	0.00386939	n646_rs15255(N/A|-10.25960|0.0929411|144|158|40|54|N/A)	ix91_rs10270(N/A|-7.84428|0.1096665|172|186|56|71|GeneID:23445147)	vv_rs05585(N/A|-10.33010|0.08834516|144|158|40|54|GeneID:2623900)	jv59_rs10630(N/A|-7.92543|0.1018114|145|158|60|73|N/A)	vs_rs10330(N/A|-9.17522|0.04951504|149|158|40|49|GeneID:7161749)	vp0917(clpP|-9.98650|0.1125005|120|134|40|54|GeneID:1188415)	vibhar_rs06700(N/A|-10.40220|0.08975974|144|158|40|54|GeneID:5553005)	ATP-dependent Clp protease proteolytic subunit	dddddd	0
0.591802	0.0117781	n646_rs15730(N/A|-13.18380|0.01488222|86|124|1|47|N/A)	dddddd	vv_rs17640(N/A|-14.45340|0.005785668|120|164|1|42|GeneID:2621271)	dddddd	vs_rs21940(N/A|-4.90719|0.5149128|125|139|41|55|GeneID:25120413)	vpa1445(N/A|-14.39490|0.007449475|88|125|1|45|GeneID:1192141)	vibhar_rs19270(N/A|-11.37650|0.05148979|88|126|1|45|GeneID:5557427)	calcium-binding protein	dddddd	2
0.524798	0.00914234	n646_rs15735(N/A|-7.94421|0.3020135|210|225|57|74|N/A)	dddddd	vv_rs17635(N/A|-13.78850|0.009498208|145|172|41|67|GeneID:2621270)	dddddd	dddddd	vpa1446(N/A|-8.32289|0.2541978|210|225|57|74|GeneID:1192142)	vibhar_rs19265(N/A|-7.09886|0.4250669|143|155|43|55|GeneID:5557507)	helix-turn-helix transcriptional regulator	dddddd	3
0.644441	0.0165967	n646_rs15985(N/A|-3.74347|0.941079|48|61|39|53|N/A)	dddddd	vv_rs21590(N/A|-11.26100|0.05117673|175|194|25|45|GeneID:2622118)	dddddd	vs_rs21285(N/A|-7.84333|0.1189384|288|294|39|45|GeneID:7138662)	vpa1496(N/A|-7.95970|0.2980107|78|91|35|46|GeneID:1192192)	vibhar_rs19000(N/A|-14.83020|0.005317309|235|248|40|53|GeneID:5558674)	prolyl endopeptidase	dddddd	2
0.401266	0.00545998	n646_rs16180(N/A|-8.53549|0.2297355|130|169|37|69|N/A)	dddddd	dddddd	jv59_rs03565(N/A|-4.04084|0.6922303|15|27|75|88|N/A)	dddddd	vpa1539(N/A|-8.43419|0.2417485|126|169|37|74|GeneID:1192235)	vibhar_rs18465(N/A|-14.81260|0.005385924|73|145|16|74|GeneID:5558043)	Derived by automated computational analysis using gene prediction method: Protein Homology.	dddddd	3
0.380585	0.00445302	n646_rs16255(N/A|-9.93502|0.1114137|161|196|25|53|N/A)	dddddd	dddddd	jv59_rs03495(N/A|-5.15156|0.4671628|269|275|82|88|N/A)	dddddd	vpa1554(N/A|-20.83180|2.460734e-05|94|150|9|70|GeneID:1192250)	vibhar_rs18385(N/A|-15.69760|0.002776621|95|150|9|70|GeneID:5558147)	flagellar protein	dddddd	3
0.640381	0.0159846	n646_rs16965(N/A|-9.97506|0.1089776|21|40|27|48|N/A)	ix91_rs16005(N/A|-11.41280|0.00658156|129|156|61|84|GeneID:23446294)	vv_rs22950(N/A|-7.28026|0.3878580|124|148|21|45|GeneID:2622425)	jv59_rs22535(N/A|-9.80874|0.02574731|13|25|53|65|N/A)	vs_rs08100(N/A|-7.88351|0.1160395|150|156|42|48|GeneID:7161302)	vpa1691(N/A|-7.50524|0.3596109|135|142|38|45|GeneID:1192387)	vibhar_rs17540(N/A|-7.44268|0.3722468|192|211|25|45|GeneID:5557762)	MFS transporter	dddddd	0
0.588209	0.0113176	n646_rs17070(N/A|-9.53928|0.1380705|151|159|39|47|N/A)	ix91_rs21580(N/A|-2.85568|0.883027|293|299|61|67|GeneID:23447409)	vv_rs23340(N/A|-12.86410|0.01821595|123|146|16|38|GeneID:2622513)	dddddd	vs_rs14855(N/A|-7.33753|0.1607023|150|159|39|48|GeneID:7137323)	vpa1733(N/A|-13.75880|0.01155836|140|159|39|65|GeneID:1192429)	vibhar_rs27410(N/A|-13.47390|0.01373198|128|159|39|72|GeneID:5558827)	HlyD family type I secretion periplasmic adaptor subunit	dddddd	1
0.296357	0.00232955	n646_rs17125(N/A|-10.38050|0.0867691|1|51|26|70|N/A)	ix91_rs02700(N/A|-9.25383|0.04072738|286|296|56|66|GeneID:23443633)	vv_rs23400(N/A|-12.14500|0.02937980|282|296|37|52|GeneID:2622528)	jv59_rs12530(N/A|-8.82055|0.05467443|282|296|57|71|N/A)	dddddd	vpa1741(N/A|-10.49120|0.08570709|280|296|37|55|GeneID:1192437)	dddddd	RpiR family transcriptional regulator	dddddd	2
0.208322	0.000887786	n646_rs18010(tnaA|-11.61650|0.04148769|189|198|37|46|N/A)	ix91_rs21605(tnaA|-9.75838|0.02754433|190|198|56|64|GeneID:23447414)	vv_rs21900(tnaA|-9.84930|0.1152887|198|206|38|46|GeneID:2622187)	jv59_rs24305(tnaA|-6.81828|0.2024095|127|135|53|61|N/A)	vs_rs05915(tnaA|-10.15760|0.02400979|199|205|39|45|GeneID:7160842)	vpa0192(tnaA|-12.37130|0.02846524|190|198|37|45|GeneID:1190879)	vibhar_rs25850(tnaA|-12.16230|0.03201336|190|198|37|45|GeneID:5558109)	L-cysteine desulfhydrase	dddddd	0
0.470003	0.00754255	n646_rs19385(N/A|-9.49381|0.1414487|79|88|42|51|N/A)	ix91_rs19480(N/A|-7.17945|0.1660926|115|124|61|70|GeneID:23446989)	vv_rs21260(N/A|-9.45420|0.1422775|109|118|42|51|GeneID:2622050)	jv59_rs19580(N/A|-8.69600|0.05981947|114|123|62|71|N/A)	vs_rs17635(N/A|-9.68552|0.03428424|43|79|41|77|GeneID:7137903)	vpa1198(N/A|-9.26432|0.1628884|87|96|42|51|GeneID:1191894)	vibhar_rs20250(N/A|-8.61823|0.2234300|17|41|51|74|GeneID:5557406)	nitrate reductase	dddddd	0
0.591802	0.011744	n646_rs19655(N/A|-12.87070|0.01841213|253|299|14|59|N/A)	ix91_rs04805(N/A|-5.15018|0.4670272|284|299|14|29|GeneID:23444054)	dddddd	jv59_rs20035(N/A|-6.79660|0.2049544|113|122|56|65|N/A)	vs_rs19535(N/A|-8.33751|0.08713404|251|299|14|62|GeneID:7138293)	vp1392(N/A|-11.68890|0.04314387|253|299|14|59|GeneID:1188899)	vibhar_rs22370(N/A|-9.69226|0.1313031|253|299|14|59|GeneID:5556507)	ClpV1 family T6SS ATPase	dddddd	1
0.0856656	0.000116065	n646_rs20335(N/A|-12.90720|0.01796467|253|281|37|72|N/A)	dddddd	vv_rs18910(N/A|-9.23601|0.1592646|111|142|24|53|GeneID:2622623)	jv59_rs17115(N/A|-8.00658|0.09646018|16|55|26|64|N/A)	vs_rs18935(N/A|-14.44270|0.0003813579|231|269|15|55|GeneID:7138170)	vpa0680(N/A|-11.53830|0.04717736|249|290|24|71|GeneID:1191369)	dddddd	arylsulfatase	dddddd	2
0.296357	0.00241182	n646_rs20385(N/A|-11.07270|0.05784816|129|159|39|71|N/A)	dddddd	dddddd	dddddd	vs_rs20400(N/A|-6.37760|0.2701376|128|159|39|72|GeneID:7138479)	vpa0691(N/A|-11.08200|0.06152027|129|159|39|71|GeneID:1191380)	vibhar_rs23310(N/A|-10.36880|0.09142422|151|159|39|47|GeneID:5556817)	riboflavin-specific deaminase	dddddd	3
0.609694	0.0141014	n646_rs20955(N/A|-9.12155|0.1717457|141|181|28|75|N/A)	ix91_rs19405(N/A|-9.18984|0.04273849|74|109|52|89|GeneID:23446974)	vv_rs19290(N/A|-10.67800|0.07237525|270|285|37|53|GeneID:2622591)	jv59_rs19510(N/A|-7.55893|0.1291459|111|133|59|84|N/A)	dddddd	vpa0855(N/A|-8.27660|0.2595103|223|237|25|45|GeneID:1191544)	vibhar_rs22540(N/A|-9.93009|0.1158738|173|187|28|44|GeneID:5558540)	bifunctional metallophosphatase/5'-nucleotidase	dddddd	1
0.365159	0.00417759	n646_rs21335(N/A|-9.63109|0.1314535|3|21|28|44|N/A)	ix91_rs19700(N/A|-8.08619|0.0935045|141|152|10|21|GeneID:23447033)	vv_rs19945(N/A|-12.91410|0.01760446|132|169|28|66|GeneID:2621752)	jv59_rs19810(N/A|-8.33834|0.07697271|141|152|10|21|N/A)	vs_rs18155(N/A|-5.59262|0.3907353|5|22|29|45|GeneID:7138004)	vpa0941(N/A|-11.17030|0.05847669|3|21|28|44|GeneID:1191630)	vibhar_rs21665(N/A|-14.43370|0.007074327|118|169|28|74|GeneID:5557549)	anaerobic ribonucleoside triphosphate reductase	dddddd	0
0.261145	0.00149302	n646_rs21865(N/A|-12.09920|0.03057798|126|178|22|73|N/A)	ix91_rs20290(N/A|-8.32916|0.07931746|148|165|54|69|GeneID:23447151)	vv_rs20225(N/A|-10.33610|0.08804609|148|163|36|50|GeneID:2621812)	jv59_rs18850(N/A|-9.19369|0.04148514|160|189|59|88|N/A)	vs_rs09790(N/A|-7.86297|0.1175141|143|193|11|55|GeneID:7161642)	vpa1063(N/A|-12.47680|0.02665025|126|178|22|73|GeneID:1191758)	vibhar_rs21080(N/A|-12.10520|0.03316469|126|178|22|73|GeneID:5558800)	glycosyl transferase	dddddd	0
0.644441	0.016424	n646_rs22205(N/A|-9.99102|0.1080193|44|52|37|45|N/A)	dddddd	dddddd	jv59_rs23035(N/A|-7.60554|0.1253677|44|52|57|65|N/A)	dddddd	vpa0628(N/A|-13.46550|0.01407358|190|208|25|45|GeneID:1191317)	vibhar_rs20710(N/A|-11.37500|0.05153535|190|208|25|45|GeneID:5558297)	cytochrome ubiquinol oxidase subunit I	dddddd	3
0.401266	0.00563401	n646_rs22265(N/A|-8.21158|0.2675785|107|118|59|72|N/A)	ix91_rs20405(N/A|-8.56359|0.06739135|125|154|63|87|GeneID:23447174)	dddddd	jv59_rs18685(N/A|-6.56604|0.2335134|208|218|53|63|N/A)	dddddd	vpa0616(N/A|-6.04964|0.5962986|106|114|51|59|GeneID:1191305)	vibhar_rs20650(N/A|-20.48870|3.413141e-05|104|145|17|69|GeneID:5558372)	gamma-carboxygeranoyl-CoA hydratase	dddddd	2
0.640078	0.0156441	n646_rs23110(N/A|-10.23740|0.0941147|183|226|26|66|N/A)	ix91_rs16815(N/A|-7.79427|0.1132789|18|26|56|64|GeneID:23446456)	vv_rs21910(N/A|-11.15840|0.05445635|262|282|33|53|GeneID:2622189)	dddddd	vs_rs05795(N/A|-6.33490|0.2759886|64|72|66|74|GeneID:7160817)	vpa0467(N/A|-8.35858|0.2501559|210|226|26|42|GeneID:1191155)	dddddd	elongation factor 3	dddddd	2

## Sheet: IntaRNA-200-100
target_name	target_region_len	target_hyb_len	target_start_pos	target_end_pos	target_seed_start_pos	target_seed_end_pos	target_ED	sRNA_name	sRNA_hyb_len	sRNA_start_pos	sRNA_end_pos	sRNA_seed_start_pos	sRNA_seed_end_pos	sRNA_ED	hybrid_energy	energy
N646_RS20160	300	20	143	162	156	162	2.86382	misc_RNA_3465	20	38	57	38	44	3.90474	-27.8	-20.9999
N646_RS08055	300	46	180	225	210	216	10.031	misc_RNA_3465	41	25	65	33	39	6.40957	-37.3	-20.8521
N646_RS22305	300	33	248	280	273	279	6.54733	misc_RNA_3465	30	22	51	23	29	7.51708	-34.6	-20.5504
N646_RS06395	300	29	188	216	198	204	7.55319	misc_RNA_3465	33	42	74	58	64	5.8861	-33.4	-19.9623
N646_RS23140	300	71	5	75	53	59	16.5061	misc_RNA_3465	70	6	75	23	29	14.1066	-50	-19.3697
N646_RS11395	300	48	189	236	230	236	12.4565	misc_RNA_3465	50	26	75	26	32	6.4559	-38	-19.1273
N646_RS15680	300	33	124	156	150	156	7.14578	misc_RNA_3465	30	16	45	16	22	10.3052	-36.2	-18.7227
N646_RS17200	300	43	74	116	83	89	15.4713	misc_RNA_3465	42	6	47	31	37	10.8629	-44.7	-18.3743
N646_RS23280	300	26	184	209	203	209	6.00315	misc_RNA_3465	27	39	65	39	45	6.30752	-30.7	-18.3691
N646_RS10455	300	32	88	119	106	112	8.30612	misc_RNA_3465	41	26	66	33	39	6.41352	-32.9	-18.1963
N646_RS14960	300	24	193	216	210	216	3.70843	misc_RNA_3465	25	21	45	21	27	6.50649	-28	-17.7862
N646_RS02435	300	48	141	188	182	188	8.44437	misc_RNA_3465	39	20	58	20	26	9.16026	-35.1	-17.5205
N646_RS18970	300	29	184	212	187	193	6.6838	misc_RNA_3465	31	35	65	56	62	6.3683	-30.3	-17.2946
N646_RS14315	300	45	178	222	187	193	7.89255	misc_RNA_3465	44	28	71	56	62	6.44767	-31.5	-17.1802
N646_RS13215	300	27	155	181	165	171	5.93723	misc_RNA_3465	28	26	53	35	41	4.25666	-27.2	-17.0243
N646_RS22760	300	43	3	45	39	45	9.19424	misc_RNA_3465	47	26	72	26	32	6.4559	-32.6	-16.9101
N646_RS05015	300	53	191	243	203	209	12.4897	misc_RNA_3465	59	1	59	39	45	13.4754	-42.7	-16.7726
N646_RS00080	300	34	193	226	215	221	3.83434	misc_RNA_3465	47	26	72	32	38	6.4559	-27	-16.7019
N646_RS10410	300	49	222	270	227	233	7.62198	misc_RNA_3465	49	26	74	63	69	6.4559	-30.7	-16.6139
N646_RS09105	300	26	268	293	287	293	10.5684	misc_RNA_3465	24	40	63	40	46	5.97286	-33	-16.4871
N646_RS13870	300	18	51	68	62	68	4.14641	misc_RNA_3465	19	35	53	35	41	3.62603	-24.2	-16.4653
N646_RS04750	300	55	188	242	228	234	14.2879	misc_RNA_3465	50	25	74	32	38	6.45594	-37.2	-16.4273
N646_RS21185	300	14	54	67	61	67	3.24312	misc_RNA_3465	14	38	51	38	44	3.54835	-23.2	-16.3953
N646_RS19700	300	65	141	205	151	157	10.5743	misc_RNA_3465	70	6	75	57	63	14.1066	-41	-16.3471
N646_RS22035	300	38	3	40	34	40	9.34549	misc_RNA_3465	37	32	68	32	38	6.39294	-32	-16.3004
N646_RS17300	300	39	172	210	204	210	6.39848	misc_RNA_3465	38	26	63	26	32	6.08184	-28.6	-16.1336
N646_RS08825	300	17	282	298	285	291	0.07141	misc_RNA_3465	18	26	43	33	39	3.18958	-19.4	-16.1003
N646_RS04550	300	36	48	83	75	81	12.9506	misc_RNA_3465	38	35	72	37	43	6.42425	-35.4	-16.0371
N646_RS21320	300	34	1	34	21	27	5.69452	misc_RNA_3465	36	28	63	37	43	6.07699	-27.8	-15.9877
N646_RS05900	300	57	129	185	152	158	15.571	misc_RNA_3465	53	3	55	26	32	12.0177	-43.6	-15.9714
N646_RS13605	300	46	162	207	192	198	15.2304	misc_RNA_3465	42	4	45	10	16	10.8637	-42	-15.9047
N646_RS19320	300	41	59	99	93	99	8.40668	misc_RNA_3465	41	25	65	25	31	6.40957	-30.7	-15.8469
N646_RS17190	300	40	179	218	203	209	10.3728	misc_RNA_3465	40	26	65	39	45	6.40943	-32.6	-15.8239
N646_RS05845	300	47	3	49	43	49	9.16415	misc_RNA_3465	43	9	51	9	15	11.8364	-36.7	-15.7244
N646_RS21210	300	27	203	229	222	228	7.81416	misc_RNA_3465	30	35	64	36	42	6.05191	-29.6	-15.695
N646_RS10520	300	35	154	188	176	182	7.78958	misc_RNA_3465	39	30	68	36	42	6.40404	-29.8	-15.6537
N646_RS06205	300	32	177	208	202	208	10.0049	misc_RNA_3465	35	40	74	40	46	6.37534	-32	-15.5964
N646_RS20885	300	36	189	224	218	224	7.9751	misc_RNA_3465	38	38	75	38	44	6.41573	-29.9	-15.508
N646_RS04690	300	16	36	51	45	51	3.99655	misc_RNA_3465	16	37	52	37	43	3.5963	-23.1	-15.4828
N646_RS00310	300	32	128	159	130	136	9.28915	misc_RNA_3465	32	14	45	37	43	10.3164	-35	-15.3705
N646_RS15730	300	39	136	174	168	174	12.8701	misc_RNA_3465	47	1	47	1	7	10.8665	-39.1	-15.3532
N646_RS16615	300	36	11	46	40	46	9.65789	misc_RNA_3465	34	41	74	41	47	6.07682	-31	-15.2932
N646_RS13320	300	20	1	20	14	20	2.10196	misc_RNA_3465	20	26	45	26	32	3.21322	-20.5	-15.2331
N646_RS02765	300	34	38	71	42	48	9.59214	misc_RNA_3465	34	40	73	63	69	6.34958	-31.2	-15.2088
N646_RS13305	300	36	121	156	150	156	10.3043	misc_RNA_3465	31	40	70	40	46	6.34334	-31.8	-15.1762
N646_RS02130	300	17	13	29	23	29	4.11472	misc_RNA_3465	18	35	52	35	41	3.61215	-22.9	-15.1486
N646_RS03680	300	38	195	232	226	232	5.76297	misc_RNA_3465	46	20	65	20	26	9.78687	-30.7	-15.1336
N646_RS16065	300	59	164	222	216	222	9.94651	misc_RNA_3465	54	1	54	1	7	11.908	-36.9	-15.042
N646_RS06705	300	57	190	246	240	246	13.9545	misc_RNA_3465	55	11	65	11	17	14.0349	-43	-15.0102
N646_RS02780	300	32	188	219	213	219	8.78327	misc_RNA_3465	39	37	75	37	43	6.41963	-30.2	-14.9936
N646_RS13655	300	46	131	176	170	176	10.8875	misc_RNA_3465	42	25	66	25	31	6.41363	-32.3	-14.9671
N646_RS15000	300	21	270	290	280	286	7.11405	misc_RNA_3465	22	53	74	58	64	3.89722	-26	-14.9507
N646_RS12505	300	50	248	297	291	297	7.20835	misc_RNA_3465	35	28	62	28	34	6.04049	-28.2	-14.9158
N646_RS14250	300	12	255	266	260	266	1.74796	misc_RNA_3465	12	34	45	34	40	2.64248	-19.3	-14.9086
N646_RS11125	300	11	201	211	205	211	2.72695	misc_RNA_3465	11	37	47	37	43	2.18616	-19.8	-14.8987
N646_RS01285	300	49	101	149	143	149	15.0064	misc_RNA_3465	44	29	72	29	35	6.44773	-36.4	-14.8959
N646_RS12680	300	41	137	177	171	177	9.11784	misc_RNA_3465	40	34	73	34	40	6.42677	-30.4	-14.8933
N646_RS14325	300	17	135	151	145	151	3.32644	misc_RNA_3465	20	34	53	34	40	3.62718	-21.8	-14.8702
N646_RS09980	300	26	171	196	190	196	3.63449	misc_RNA_3465	29	27	55	27	33	4.3664	-22.9	-14.8604
N646_RS00470	300	54	185	238	217	223	12.8668	misc_RNA_3465	59	7	65	27	33	14.053	-41.8	-14.8546
N646_RS17270	300	68	132	199	132	138	24.1791	misc_RNA_3465	64	11	74	68	74	14.0895	-53.1	-14.8217
N646_RS14710	300	41	182	222	198	204	11.5228	misc_RNA_3465	41	28	68	44	50	6.40796	-32.7	-14.8051
N646_RS07260	300	41	53	93	56	62	8.54726	misc_RNA_3465	49	26	74	65	71	6.4559	-29.8	-14.7872
N646_RS15185	300	21	194	214	199	205	3.53537	misc_RNA_3465	28	41	68	57	63	6.01672	-24.3	-14.7809
N646_RS09215	300	29	183	211	205	211	8.34139	misc_RNA_3465	28	37	64	37	43	6.02606	-29.1	-14.765
N646_RS11860	300	45	103	147	141	147	10.5707	misc_RNA_3465	34	27	60	27	33	5.83323	-31.2	-14.748
N646_RS03815	300	27	153	179	173	179	3.51701	misc_RNA_3465	25	25	49	25	31	3.21889	-21.4	-14.7103
N646_RS00875	300	45	186	230	224	230	9.718	misc_RNA_3465	49	26	74	26	32	6.4559	-30.9	-14.6934
N646_RS22365	300	33	201	233	227	233	5.18433	misc_RNA_3465	22	26	47	26	32	3.21546	-23.1	-14.6785
N646_RS14910	300	59	152	210	204	210	13.5239	misc_RNA_3465	71	1	71	1	7	14.1066	-42.3	-14.6662
N646_RS10675	300	41	184	224	218	224	10.0045	misc_RNA_3465	41	26	66	26	32	6.41352	-31.1	-14.665
N646_RS06470	300	17	34	50	44	50	4.10617	misc_RNA_3465	16	37	52	37	43	3.5963	-22.3	-14.6441
N646_RS03435	300	51	189	239	233	239	10.0841	misc_RNA_3465	50	26	75	26	32	6.4559	-31.2	-14.6419
N646_RS11430	300	57	12	68	62	68	8.22212	misc_RNA_3465	54	12	65	12	18	14.0319	-36.9	-14.6225
N646_RS20245	300	40	76	115	109	115	9.91253	misc_RNA_3465	42	26	67	26	32	6.41568	-30.9	-14.6214
N646_RS09485	300	25	62	86	76	82	4.23885	misc_RNA_3465	27	29	55	34	40	4.35674	-23.2	-14.5795
N646_RS03430	300	26	7	32	15	21	3.44056	misc_RNA_3465	21	36	56	43	49	3.88799	-21.9	-14.5725
N646_RS03530	300	47	152	198	192	198	11.7906	misc_RNA_3465	40	14	53	14	20	11.8308	-38.2	-14.566
N646_RS21110	300	28	89	116	110	116	5.12243	misc_RNA_3465	24	25	48	25	31	3.2174	-22.9	-14.5199
N646_RS20635	300	34	218	251	228	234	2.86717	misc_RNA_3465	35	40	74	60	66	6.37534	-23.7	-14.4936
N646_RS10445	300	22	200	221	215	221	6.05041	misc_RNA_3465	24	25	48	25	31	3.2174	-23.7	-14.4818
N646_RS06135	300	42	98	139	133	139	14.4082	misc_RNA_3465	46	8	53	8	14	11.8825	-40.7	-14.4524
N646_RS10200	300	37	69	105	70	76	11.0412	misc_RNA_3465	39	34	72	65	71	6.42653	-31.9	-14.4481
N646_RS05495	300	32	68	99	93	99	6.72233	misc_RNA_3465	35	25	59	25	31	5.82366	-27	-14.4043
N646_RS19820	300	78	180	257	251	257	13.6032	misc_RNA_3465	72	3	74	3	9	14.1065	-42.1	-14.3994
N646_RS14445	300	28	254	281	275	281	5.47555	misc_RNA_3465	29	38	66	38	44	6.3402	-26.2	-14.3652
N646_RS05530	300	41	184	224	218	224	7.7736	misc_RNA_3465	39	29	67	29	35	6.40777	-28.5	-14.3173
N646_RS14830	300	54	179	232	210	216	9.19314	misc_RNA_3465	53	1	53	14	20	11.9078	-35.4	-14.3124
N646_RS05840	300	25	184	208	202	208	3.76397	misc_RNA_3465	28	48	75	48	54	3.96626	-22	-14.3109
N646_RS13415	300	31	189	219	213	219	2.30884	misc_RNA_3465	31	25	55	25	31	4.36697	-21	-14.304
N646_RS02885	300	67	35	101	73	79	12.8656	misc_RNA_3465	63	10	72	32	38	14.083	-41.3	-14.3016
N646_RS16150	300	41	191	231	225	231	7.4589	misc_RNA_3465	44	31	74	31	37	6.45244	-28.2	-14.2999
N646_RS11500	300	28	104	131	125	131	5.65118	misc_RNA_3465	29	28	56	28	34	5.37599	-25.3	-14.2963
N646_RS02950	300	14	54	67	61	67	5.36754	misc_RNA_3465	14	38	51	38	44	3.54835	-23.2	-14.2515
N646_RS07750	300	41	183	223	198	204	7.44321	misc_RNA_3465	42	27	68	44	50	6.41533	-28.1	-14.2378
N646_RS13920	300	12	231	242	236	242	3.10312	misc_RNA_3465	12	3	14	3	9	1.44564	-18.8	-14.2226
N646_RS22595	300	20	53	72	66	72	3.34788	misc_RNA_3465	20	25	44	25	31	3.20967	-20.8	-14.2051
N646_RS06610	300	43	149	191	184	190	9.54947	misc_RNA_3465	40	13	52	14	20	11.8364	-35.6	-14.1932
N646_RS20715	300	19	277	295	289	295	2.0993	misc_RNA_3465	21	37	57	37	43	3.90625	-20.2	-14.1919
N646_RS21040	300	33	172	204	189	195	8.82347	misc_RNA_3465	35	11	45	20	26	10.3415	-33.3	-14.1776
N646_RS05620	300	35	181	215	209	215	4.29384	misc_RNA_3465	32	34	65	34	40	6.37061	-24.8	-14.1726
N646_RS15750	300	17	96	112	106	112	3.78766	misc_RNA_3465	19	38	56	38	44	3.8857	-21.8	-14.1704
N646_RS00680	300	24	200	223	216	222	5.63354	misc_RNA_3465	27	36	62	37	43	5.99406	-25.8	-14.1631
N646_RS03930	300	33	18	50	29	35	10.3197	misc_RNA_3465	36	39	74	57	63	6.39873	-30.9	-14.1567
N646_RS20955	300	43	189	231	217	223	6.81204	misc_RNA_3465	47	28	74	38	44	6.45561	-27.4	-14.1511
N646_RS03150	300	27	200	226	220	226	3.84882	misc_RNA_3465	29	34	62	34	40	6.01639	-24	-14.1313
N646_RS05170	300	26	54	79	57	63	5.47994	misc_RNA_3465	25	26	50	41	47	3.22083	-22.8	-14.1171
N646_RS15960	300	66	200	265	242	248	13.9071	misc_RNA_3465	62	1	62	22	28	13.6978	-41.7	-14.1146
N646_RS17830	300	25	136	160	140	146	6.34464	misc_RNA_3465	27	42	68	58	64	5.81976	-26.3	-14.1012
N646_RS22015	300	58	100	157	151	157	15.38	misc_RNA_3465	46	4	49	4	10	10.8695	-40.3	-14.0952
N646_RS03870	300	50	1	50	44	50	4.31445	misc_RNA_3465	35	10	44	10	16	10.6633	-29.1	-14.0869
N646_RS06985	300	45	146	190	184	190	12.2049	misc_RNA_3465	51	19	69	19	25	12.9539	-39.2	-14.0834
N646_RS14070	300	33	189	221	215	221	4.44622	misc_RNA_3465	34	42	75	42	48	5.88674	-24.4	-14.067
N646_RS08770	300	49	103	151	142	148	5.47901	misc_RNA_3465	48	25	72	29	35	6.45593	-26	-14.0494
N646_RS05175	300	20	137	156	150	156	3.6759	misc_RNA_3465	18	29	46	29	35	3.20719	-20.9	-14.0178
N646_RS21335	300	19	53	71	55	61	5.01673	misc_RNA_3465	17	28	44	36	42	3.20198	-22.2	-13.9801
N646_RS19975	300	9	68	76	70	76	1.46105	misc_RNA_3465	9	37	45	37	43	1.78345	-17.2	-13.9496
N646_RS17675	300	44	13	56	49	55	12.1342	misc_RNA_3465	40	13	52	14	20	11.8364	-37.9	-13.8955
N646_RS01135	300	42	226	267	261	267	5.47457	misc_RNA_3465	42	1	42	1	7	10.8373	-30.2	-13.8929
N646_RS02200	300	43	35	77	71	77	11.3214	misc_RNA_3465	39	37	75	37	43	6.41963	-31.6	-13.8616
N646_RS23055	300	45	72	116	85	91	14.9204	misc_RNA_3465	36	13	48	29	35	10.3464	-39.1	-13.8528
N646_RS00575	300	47	22	68	62	68	9.60798	misc_RNA_3465	46	26	71	26	32	6.4559	-29.9	-13.8359
N646_RS16575	300	45	101	145	107	113	8.96246	misc_RNA_3465	41	30	70	58	64	6.4425	-29.2	-13.8307
N646_RS15200	300	38	35	72	58	64	7.31291	misc_RNA_3465	45	27	71	37	43	6.45553	-27.6	-13.8192
N646_RS15390	300	31	266	296	281	287	7.93878	misc_RNA_3465	28	26	53	32	38	4.25666	-26	-13.7864
N646_RS06425	300	48	89	136	130	136	16.3593	misc_RNA_3465	50	25	74	25	31	6.45594	-36.6	-13.778
N646_RS01635	300	67	194	260	254	260	14.4026	misc_RNA_3465	66	1	66	1	7	14.0643	-42.2	-13.7295
N646_RS20760	300	30	122	151	129	135	6.35306	misc_RNA_3465	33	21	53	40	46	7.55904	-27.6	-13.7288
N646_RS07265	300	12	43	54	48	54	2.84098	misc_RNA_3465	12	40	51	40	46	3.49234	-20.1	-13.7178
N646_RS07825	300	39	178	216	210	216	5.7756	misc_RNA_3465	49	25	73	25	31	6.45593	-25.9	-13.7007
N646_RS06865	300	33	257	289	273	279	7.26084	misc_RNA_3465	26	41	66	49	55	6.00752	-27	-13.6827
N646_RS07735	300	24	153	176	159	165	5.64164	misc_RNA_3465	23	28	50	38	44	3.21794	-22.5	-13.6815
N646_RS05740	300	32	73	104	86	92	4.94819	misc_RNA_3465	30	37	66	44	50	6.34484	-25	-13.6801
N646_RS13835	300	45	231	275	269	275	14.4661	misc_RNA_3465	43	1	43	1	7	10.8406	-39	-13.6731
N646_RS22915	300	63	162	224	218	224	18.6314	misc_RNA_3465	48	6	53	6	12	11.8966	-44.2	-13.6491
N646_RS18335	300	25	132	156	147	153	5.55964	misc_RNA_3465	25	35	59	38	44	5.76857	-25	-13.6455
N646_RS00125	300	47	243	289	255	261	9.98953	misc_RNA_3465	46	25	70	52	58	6.45488	-30.1	-13.621
N646_RS20845	300	41	180	220	206	212	11.0157	misc_RNA_3465	46	27	72	37	43	6.4556	-31.1	-13.6015
N646_RS02860	300	34	187	220	214	220	4.59827	misc_RNA_3465	38	25	62	25	31	6.04571	-24.2	-13.5987
N646_RS11740	300	50	184	233	210	216	11.8266	misc_RNA_3465	55	21	75	37	43	9.82997	-35.2	-13.5727
N646_RS05785	300	15	113	127	121	127	6.23551	misc_RNA_3465	15	31	45	31	37	3.0245	-22.8	-13.5386
N646_RS06620	300	17	144	160	154	160	4.64489	misc_RNA_3465	22	22	43	22	28	6.46961	-24.6	-13.5314
N646_RS20720	300	52	145	196	190	196	6.41139	misc_RNA_3465	47	20	66	20	26	9.79094	-29.7	-13.5309
N646_RS18890	300	38	109	146	140	146	12.1333	misc_RNA_3465	38	36	73	36	42	6.40563	-32	-13.5097
N646_RS21085	300	20	134	153	147	153	5.99502	misc_RNA_3465	19	37	55	37	43	3.66241	-23.1	-13.4888
N646_RS04930	300	26	187	212	206	212	4.17738	misc_RNA_3465	27	36	62	36	42	5.99406	-23.7	-13.4821
N646_RS15140	300	28	220	247	223	229	5.1191	misc_RNA_3465	31	40	70	61	67	6.34334	-24.9	-13.4723
N646_RS22360	300	50	173	222	179	185	11.4787	misc_RNA_3465	48	25	72	60	66	6.45593	-31.4	-13.4651
N646_RS01545	300	44	94	137	125	131	9.14083	misc_RNA_3465	45	29	73	35	41	6.44776	-29	-13.4533
N646_RS13585	300	22	43	64	45	51	5.60798	misc_RNA_3465	21	43	63	55	61	5.44452	-24.5	-13.4491
N646_RS18340	300	24	190	213	194	200	4.13381	misc_RNA_3465	26	50	75	65	71	3.95732	-21.5	-13.4152
N646_RS09015	300	29	162	190	184	190	6.19154	misc_RNA_3465	30	26	55	26	32	4.3669	-24	-13.4125
N646_RS06695	300	69	9	77	55	61	16.2268	misc_RNA_3465	70	6	75	32	38	14.1066	-43.7	-13.3912
N646_RS15035	300	13	259	271	265	271	2.50183	misc_RNA_3465	13	41	53	41	47	3.42538	-19.3	-13.3874
N646_RS14025	300	50	149	198	192	198	6.38885	misc_RNA_3465	31	25	55	25	31	4.36697	-24.1	-13.3725
N646_RS07030	300	23	253	275	269	275	8.9489	misc_RNA_3465	21	26	46	26	32	3.2139	-25.5	-13.3588
N646_RS17055	300	31	250	280	274	280	6.9143	misc_RNA_3465	28	28	55	28	34	4.35694	-24.6	-13.3392
N646_RS05085	300	25	72	96	81	87	2.81486	misc_RNA_3465	39	25	63	35	41	6.08194	-22.2	-13.3238
N646_RS02270	300	27	259	285	279	285	6.07076	misc_RNA_3465	27	26	52	26	32	4.23633	-23.6	-13.3097
N646_RS19210	300	56	163	218	212	218	10.3143	misc_RNA_3465	42	27	68	27	33	6.41533	-30	-13.2924
N646_RS18485	300	17	37	53	47	53	2.04258	misc_RNA_3465	21	25	45	25	31	3.21328	-18.5	-13.2856
N646_RS18625	300	40	1	40	12	18	6.68608	misc_RNA_3465	32	12	43	27	33	10.3193	-30.3	-13.2802
N646_RS15610	300	15	17	31	19	25	3.9038	misc_RNA_3465	14	35	48	40	46	2.99871	-20.2	-13.2668
N646_RS04895	300	33	267	299	285	291	7.73202	misc_RNA_3465	35	41	75	49	55	6.07715	-27.1	-13.2586
N646_RS20965	300	33	229	261	255	261	7.24426	misc_RNA_3465	23	24	46	24	30	6.21933	-26.7	-13.2515
N646_RS12010	300	29	192	220	212	218	5.04283	misc_RNA_3465	32	40	71	42	48	6.34455	-24.6	-13.2471
N646_RS22985	300	22	201	222	216	222	4.22208	misc_RNA_3465	23	25	47	25	31	3.21551	-20.7	-13.2297
N646_RS06390	300	15	194	208	202	208	3.1569	misc_RNA_3465	16	40	55	40	46	3.60042	-20	-13.2225
N646_RS04790	300	17	190	206	200	206	2.35567	misc_RNA_3465	18	42	59	42	48	4.79057	-20.4	-13.2137
N646_RS02460	300	31	73	103	97	103	8.36467	misc_RNA_3465	26	30	55	30	36	4.33467	-25.9	-13.198
N646_RS06910	300	40	176	215	208	214	8.8896	misc_RNA_3465	37	35	71	36	42	6.421	-28.5	-13.1919
N646_RS03895	300	27	199	225	215	221	4.13518	misc_RNA_3465	22	42	63	47	53	5.4886	-22.8	-13.165
N646_RS16210	300	20	260	279	273	279	6.84577	misc_RNA_3465	31	14	44	14	20	10.3135	-30.3	-13.0964
N646_RS08085	300	36	31	66	54	60	9.05496	misc_RNA_3465	45	9	53	15	21	11.8665	-34	-13.0799
N646_RS19440	300	31	145	175	157	163	4.28389	misc_RNA_3465	29	25	53	38	44	4.25673	-21.6	-13.0792
N646_RS10705	300	25	5	29	23	29	5.24111	misc_RNA_3465	23	21	43	21	27	6.48103	-24.8	-13.078
N646_RS13740	300	12	43	54	45	51	3.26191	misc_RNA_3465	12	1	12	4	10	1.44808	-17.8	-13.078
N646_RS06185	300	37	116	152	139	145	9.83189	misc_RNA_3465	36	10	45	14	20	10.6682	-33.6	-13.0752
N646_RS19505	300	40	241	280	273	279	10.1971	misc_RNA_3465	31	13	43	14	20	10.3165	-33.6	-13.0689
N646_RS14120	300	36	169	204	195	201	7.05828	misc_RNA_3465	27	42	68	44	50	5.81976	-25.9	-13.0657
N646_RS00140	300	18	223	240	225	231	1.80308	misc_RNA_3465	16	28	43	35	41	3.14826	-18	-13.0629
N646_RS04565	300	34	195	228	222	228	8.8089	misc_RNA_3465	36	18	53	18	24	11.5051	-33.4	-13.061
N646_RS03415	300	47	172	218	212	218	5.83765	misc_RNA_3465	45	30	74	30	36	6.45489	-25.3	-13.0394
N646_RS10715	300	29	180	208	202	208	6.58172	misc_RNA_3465	35	40	74	40	46	6.37534	-26	-13.0351
N646_RS17950	300	38	4	41	31	37	12.6257	misc_RNA_3465	32	28	59	32	38	5.80143	-31.5	-13.0292
N646_RS17160	300	15	135	149	143	149	5.49564	misc_RNA_3465	15	61	75	61	67	1.69666	-20.2	-13.0224
N646_RS02055	300	35	51	85	79	85	6.52341	misc_RNA_3465	33	12	44	12	18	10.336	-29.9	-13.0186
N646_RS05865	300	27	201	227	205	211	5.30151	misc_RNA_3465	27	21	47	37	43	6.51261	-24.8	-13.0136

## Sheet: Common targets
Supplementary Table 3 Details of common targets predicted by IntaRNA and target RNA2
	IntaRNA																targetRNA2
Target gene name	target_hyb_len	target_start_pos	target_end_pos	target_seed_start_pos	target_seed_end_pos	target_ED	sRNA_name	sRNA_hyb_len	sRNA_start_pos	sRNA_end_pos	sRNA_seed_start_pos	sRNA_seed_end_pos	sRNA_ED	p-value	hybrid_energy	energy	mRNA_start	mRNA_stop	sRNA_start	sRNA_stop	p-value	Synonym Energy	Gene	Products	Pathway	PM action	GO Component	GO Function	GO Process	KEGG
BAU10_07960	27	105	131	125	131	1.8303	srvg23535	25	20	44	20	26	6.505	0.0123526	-22.3	-13.9187	9	27	25	44	0.012	-11.25	exsE	Type III secretion regulator ExsE	Virulence	-	-	-	-	-
BAU10_08945	26	-13	12	6	12	4.38198	srvg23535	27	36	62	36	42	5.99406	0.0892314	-23.7	-13.2796	-46	-30	88	103	0.035	-9.12	-	threonylcarbamoyl-AMP synthase	Transcription	-	-	GO:0003723//RNA binding	-	K07566//tRNA threonylcarbamoyladenosine biosynthesis protein
BAU10_02460	13	127	139	133	139	5.99444	srvg23535	13	35	47	35	41	2.64704	0.0072104	-22.4	-13.8011	-16	-2	13	27	0.045	-8.56	dxs	1-deoxy-D-xylulose-5-phosphate synthase	Thiamine metabolism/Terpenoid backbone biosynthesis/Metabolic pathways/Biosynthesis of secondary metabolites/Biosynthesis of antibiotics	-	-	GO:0046872//metal ion binding;GO:0019842//vitamin binding;GO:0016744	GO:0006772//thiamine metabolic process;GO:0052863;GO:0006721//terpenoid metabolic process	K01662//1-deoxy-D-xylulose-5-phosphate synthase [EC:2.2.1.7]
BAU10_15400	11	1	11	5	11	2.59871	srvg23535	11	37	47	37	43	2.18616	0.0134671	-19.8	-15.0077	120	132	19	31	0.05	-8.3	-	ABC transporter permease	Quorum sensing	osmatic/pH stress	GO:0031224//intrinsic to membrane	-	GO:0051234//establishment of localization	K02034//peptide/nickel transport system permease protein
BAU10_07225	34	-13	20	14	20	4.62874	srvg23535	38	25	62	25	31	6.04571	0.0132189	-24.2	-13.5686	-1	13	35	48	0.044	-8.59	copB	ATPase P	Copper ion transmembrane transport	-	GO:0031224//intrinsic to membrane	GO:0043169//cation binding;GO:0032550;GO:0043682//copper-transporting ATPase activity	GO:0035434//copper ion transmembrane transport	K01533//Cu2+-exporting ATPase [EC:3.6.3.4]
BAU10_22390	59	-36	22	16	22	9.81467	srvg23535	54	1	54	1	7	11.908	0.0118594	-36.9	-15.2011	-13	5	57	74	0.011	-11.44	araC	aminotransferase	Metabolic pathways	L-cysteine (Nitrogen source)	-	GO:0043168;GO:0016769//transferase activity, transferring nitrogenous groups	-	K11325//L-cysteine/cystine lyase;K04127//isopenicillin-N epimerase [EC:5.1.1.17]
BAU10_14655	49	22	70	43	49	8.18714	srvg23535	49	26	74	50	56	6.4559	0.0067321	-30.7	-16.0315	-23	-9	12	26	0.046	-8.51	fre, ubiB	NAD(P)H-flavin reductase	Riboflavin metabolism/Porphyrin and chlorophyll metabolism/Metabolic pathways	-	-	GO:0016723//oxidoreductase activity, oxidizing metal ions, NAD or NADP as acceptor	GO:0044237//cellular metabolic process	K05368//aquacobalamin reductase / NAD(P)H-flavin reductase [EC:1.16.1.3 1.5.1.41]
BAU10_17580	24	122	145	134	140	2.83192	srvg23535	24	28	51	33	39	4.2171	0.0114758	-22.3	-15.2507	18	34	62	78	0.017	-10.67	aas	acyl-phosphate glycerol 3-phosphate acyltransferase	Fatty acid degradation/Glycerophospholipid metabolism	-	GO:0031224//intrinsic to membrane	GO:0015645//fatty acid ligase activity;GO:0008374//O-acyltransferase activity	-	K00680//[EC:2.3.1.-];K05939//acyl-[acyl-carrier-protein]-phospholipid O-acyltransferase / long-chain-fatty-acid--[acyl-carrier-protein] ligase [EC:2.3.1.40 6.2.1.20]
BAU10_22080	17	-104	-88	-94	-88	3.42167	srvg23535	19	38	56	38	44	3.8857	0.0187281	-21.8	-14.4934	-5	12	36	52	0.009	-11.75	mcp	chemotaxis protein	Two-component system/Bacterial chemotaxis	osmatic/pH stress	GO:0031224//intrinsic to membrane	GO:0060089	GO:0007154//cell communication;GO:0042221//response to chemical stimulus	K03406//methyl-accepting chemotaxis protein
BAU10_10410	43	-51	-9	-16	-10	9.5029	srvg23535	40	13	52	14	20	11.8364	0.0172104	-35.6	-14.232	49	63	60	75	0.023	-10.06	gcvR	glycine cleavage system transcriptional repressor	Biofilm formation	-	-	GO:0016209//antioxidant activity;GO:0003824//catalytic activity;GO:0031406//carboxylic acid binding	-	K03567//glycine cleavage system transcriptional repressor
BAU10_10195	29	-12	16	-2	4	7.46251	srvg23535	33	42	74	58	64	5.8861	0.0002344	-33.4	-20.0779	126	140	34	48	0.002	-13.95	cheZ	protein phosphatase	Bacterial chemotaxis	-	GO:0043232	GO:0016791//phosphatase activity	GO:0006935//chemotaxis;GO:0048870//cell motility	K03414//chemotaxis protein CheZ
BAU10_18400	9	-132	-124	-130	-124	0.94994	srvg23535	9	37	45	37	43	1.78345	0.0187281	-17.2	-14.4934	-61	-49	33	45	0.044	-8.61	maa	maltose acetyltransferase	Metabolic pathways	-	-	GO:0016413//O-acetyltransferase activity	-	K00661//maltose O-acetyltransferase [EC:2.3.1.79]
BAU10_22015	33	-76	-44	-50	-44	9.25289	srvg23535	30	16	45	16	22	10.3052	0.0061698	-35.7	-16.1551	-8	6	56	69	0.033	-9.26	kdpD	histidine kinase	Two-component system	osmatic/pH stress	-	GO:0060089;GO:0004673//protein histidine kinase activity;GO:0032550	GO:0006796//phosphate-containing compound metabolic process;GO:0007165//signal transduction	K07646//two-component system, OmpR family, sensor histidine kinase KdpD [EC:2.7.13.3]
BAU10_16085	50	-25	24	18	24	6.40337	srvg23535	47	25	71	25	31	6.45593	0.0051243	-27.2	-14.3741	-59	-45	16	30	0.018	-10.53	opsX	glycosyl transferase	-	-	-	GO:0016740//transferase activity	-	K12982//heptosyltransferase I [EC:2.4.-.-]
BAU10_19325	36	-11	24	18	24	7.80396	srvg23535	38	38	75	38	44	6.41573	0.0086157	-29.9	-15.6758	-103	-88	37	53	0.009	-11.75	-	flavodoxin	-	-	-	-	-	-
BAU10_03555	21	-6	14	-1	5	3.44592	srvg23535	28	41	68	57	63	6.01672	0.0145645	-24.3	-14.8872	11	26	61	76	0.047	-8.43	-	FAD-dependent oxidoreductase	-	-	-	GO:0003824//catalytic activity	-	K00540//[EC:1.-.-.-]
BAU10_03760	34	-7	26	15	21	4.06047	srvg23535	47	26	72	32	38	6.4559	0.0048606	-27	-16.4874	129	146	27	44	0.001	-14.77	-	hypothetical protein	-	-	-	-	-	-
BAU10_19400	37	25	61	55	61	8.2912	srvg23535	28	24	51	24	30	7.2372	0.0034786	-29	-13.493	-134	-124	36	46	0.005	-12.63	-	hypothetical protein	-	-	-	-	-	-
BAU10_18585	20	-57	-38	-44	-38	9.3068	srvg23535	20	38	57	38	44	3.90474	0.0129165	-28.3	-15.0715	-53	-38	37	51	0.02	-10.28	-	hypothetical protein	-	-	-	-	-	-
BAU10_07805	47	-48	-2	-8	-2	11.6673	srvg23535	40	14	53	14	20	11.8308	0.0184539	-38	-14.5168	17	29	59	71	0.043	-8.66	-	hypothetical protein	-	-	-	-	-	-
BAU10_19060	34	18	51	28	34	3.28024	srvg23535	35	40	74	60	66	6.37534	0.0174235	-23.7	-14.0721	-6	13	48	67	0.041	-8.79	-	hypothetical protein	-	-	-	-	-	-
BAU10_02660	17	-65	-49	-55	-49	5.01903	srvg23535	20	34	53	34	40	3.62718	0.0942301	-21.7	-13.0866	36	51	36	51	0.036	-9.07	-	hypothetical protein	-	-	-	-	-	-
